# Supplementary material for: Identification of human glucocorticoid response markers using integrated multi-omic analysis from a randomized crossover trial
Source: eLife journal article supplement (doi:10.7554/elife.62236), 2021-04-05
Supplement: repstand1 [file elife-62236-repstand1-v1.pdf]

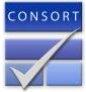

# CONSORT 2010 checklist of information to include when reporting a randomised trial\*

| Section/Topic                    | Item No | Checklist item                                                                                                                                                                              | Reported on page No    |
|----------------------------------|---------|---------------------------------------------------------------------------------------------------------------------------------------------------------------------------------------------|------------------------|
| <b>Title and abstract</b>        |         |                                                                                                                                                                                             |                        |
|                                  | 1a      | Identification as a randomised trial in the title                                                                                                                                           | Page 1                 |
|                                  | 1b      | Structured summary of trial design, methods, results, and conclusions (for specific guidance see CONSORT for abstracts)                                                                     | Page 3                 |
| <b>Introduction</b>              |         |                                                                                                                                                                                             |                        |
| Background and objectives        | 2a      | Scientific background and explanation of rationale                                                                                                                                          | Pages 4-5, Figure 1A   |
|                                  | 2b      | Specific objectives or hypotheses                                                                                                                                                           | Page 5                 |
| <b>Methods</b>                   |         |                                                                                                                                                                                             |                        |
| Trial design                     | 3a      | Description of trial design (such as parallel, factorial) including allocation ratio                                                                                                        | Page 44                |
|                                  | 3b      | Important changes to methods after trial commencement (such as eligibility criteria), with reasons                                                                                          | NA                     |
| Participants                     | 4a      | Eligibility criteria for participants                                                                                                                                                       | Page 45                |
|                                  | 4b      | Settings and locations where the data were collected                                                                                                                                        | Page 46                |
| Interventions                    | 5       | The interventions for each group with sufficient details to allow replication, including how and when they were actually administered                                                       | Pages 46-47, Figure 1B |
| Outcomes                         | 6a      | Completely defined pre-specified primary and secondary outcome measures, including how and when they were assessed                                                                          | Page 46-47             |
|                                  | 6b      | Any changes to trial outcomes after the trial commenced, with reasons                                                                                                                       | NA                     |
| Sample size                      | 7a      | How sample size was determined                                                                                                                                                              | Page 45                |
|                                  | 7b      | When applicable, explanation of any interim analyses and stopping guidelines                                                                                                                | NA                     |
| <b>Randomisation:</b>            |         |                                                                                                                                                                                             |                        |
| Sequence generation              | 8a      | Method used to generate the random allocation sequence                                                                                                                                      | Page 46                |
|                                  | 8b      | Type of randomisation; details of any restriction (such as blocking and block size)                                                                                                         | Page 46                |
| Allocation concealment mechanism | 9       | Mechanism used to implement the random allocation sequence (such as sequentially numbered containers), describing any steps taken to conceal the sequence until interventions were assigned | Page 46                |
| Implementation                   | 10      | Who generated the random allocation sequence, who enrolled participants, and who assigned participants to interventions                                                                     | Page 46                |

|                                                      |     |                                                                                                                                                   |                              |
|------------------------------------------------------|-----|---------------------------------------------------------------------------------------------------------------------------------------------------|------------------------------|
| Blinding                                             | 11a | If done, who was blinded after assignment to interventions (for example, participants, care providers, those assessing outcomes) and how          | Page 46-47                   |
|                                                      | 11b | If relevant, description of the similarity of interventions                                                                                       | Pages 46-47                  |
| Statistical methods                                  | 12a | Statistical methods used to compare groups for primary and secondary outcomes                                                                     | Pages 49-54                  |
|                                                      | 12b | Methods for additional analyses, such as subgroup analyses and adjusted analyses                                                                  | NA                           |
| <b>Results</b>                                       |     |                                                                                                                                                   |                              |
| Participant flow (a diagram is strongly recommended) | 13a | For each group, the numbers of participants who were randomly assigned, received intended treatment, and were analysed for the primary outcome    | Page 8, CONSORT flow diagram |
|                                                      | 13b | For each group, losses and exclusions after randomisation, together with reasons                                                                  | Page 8                       |
| Recruitment                                          | 14a | Dates defining the periods of recruitment and follow-up                                                                                           | Page 8                       |
|                                                      | 14b | Why the trial ended or was stopped                                                                                                                | Page 45                      |
| Baseline data                                        | 15  | A table showing baseline demographic and clinical characteristics for each group                                                                  | Table 1 (pages 10-11)        |
| Numbers analysed                                     | 16  | For each group, number of participants (denominator) included in each analysis and whether the analysis was by original assigned groups           | CONSORT flow diagram         |
| Outcomes and estimation                              | 17a | For each primary and secondary outcome, results for each group, and the estimated effect size and its precision (such as 95% confidence interval) | Pages 8-35                   |
|                                                      | 17b | For binary outcomes, presentation of both absolute and relative effect sizes is recommended                                                       | NA                           |
| Ancillary analyses                                   | 18  | Results of any other analyses performed, including subgroup analyses and adjusted analyses, distinguishing pre-specified from exploratory         | NA                           |
| Harms                                                | 19  | All important harms or unintended effects in each group (for specific guidance see CONSORT for harms)                                             | Page 9                       |
| <b>Discussion</b>                                    |     |                                                                                                                                                   |                              |
| Limitations                                          | 20  | Trial limitations, addressing sources of potential bias, imprecision, and, if relevant, multiplicity of analyses                                  | Pages 40-41                  |
| Generalisability                                     | 21  | Generalisability (external validity, applicability) of the trial findings                                                                         | Page 41                      |
| Interpretation                                       | 22  | Interpretation consistent with results, balancing benefits and harms, and considering other relevant evidence                                     | Pages 37-40                  |
| <b>Other information</b>                             |     |                                                                                                                                                   |                              |
| Registration                                         | 23  | Registration number and name of trial registry                                                                                                    | Page 45                      |
| Protocol                                             | 24  | Where the full trial protocol can be accessed, if available                                                                                       | By request                   |
| Funding                                              | 25  | Sources of funding and other support (such as supply of drugs), role of funders                                                                   | Page 56                      |

\*We strongly recommend reading this statement in conjunction with the CONSORT 2010 Explanation and Elaboration for important clarifications on all the items. If relevant, we also recommend reading CONSORT extensions for cluster randomised trials, non-inferiority and equivalence trials, non-pharmacological treatments, herbal interventions, and pragmatic trials. Additional extensions are forthcoming: for those and for up to date references relevant to this checklist, see [www.consort-statement.org](http://www.consort-statement.org).
