# Supplementary material for: Identification of human glucocorticoid response markers using integrated multi-omic analysis from a randomized crossover trial
Source: eLife journal article supplement (doi:10.7554/elife.62236), 2021-04-05

**CONSORT 2010 Flow Diagram**

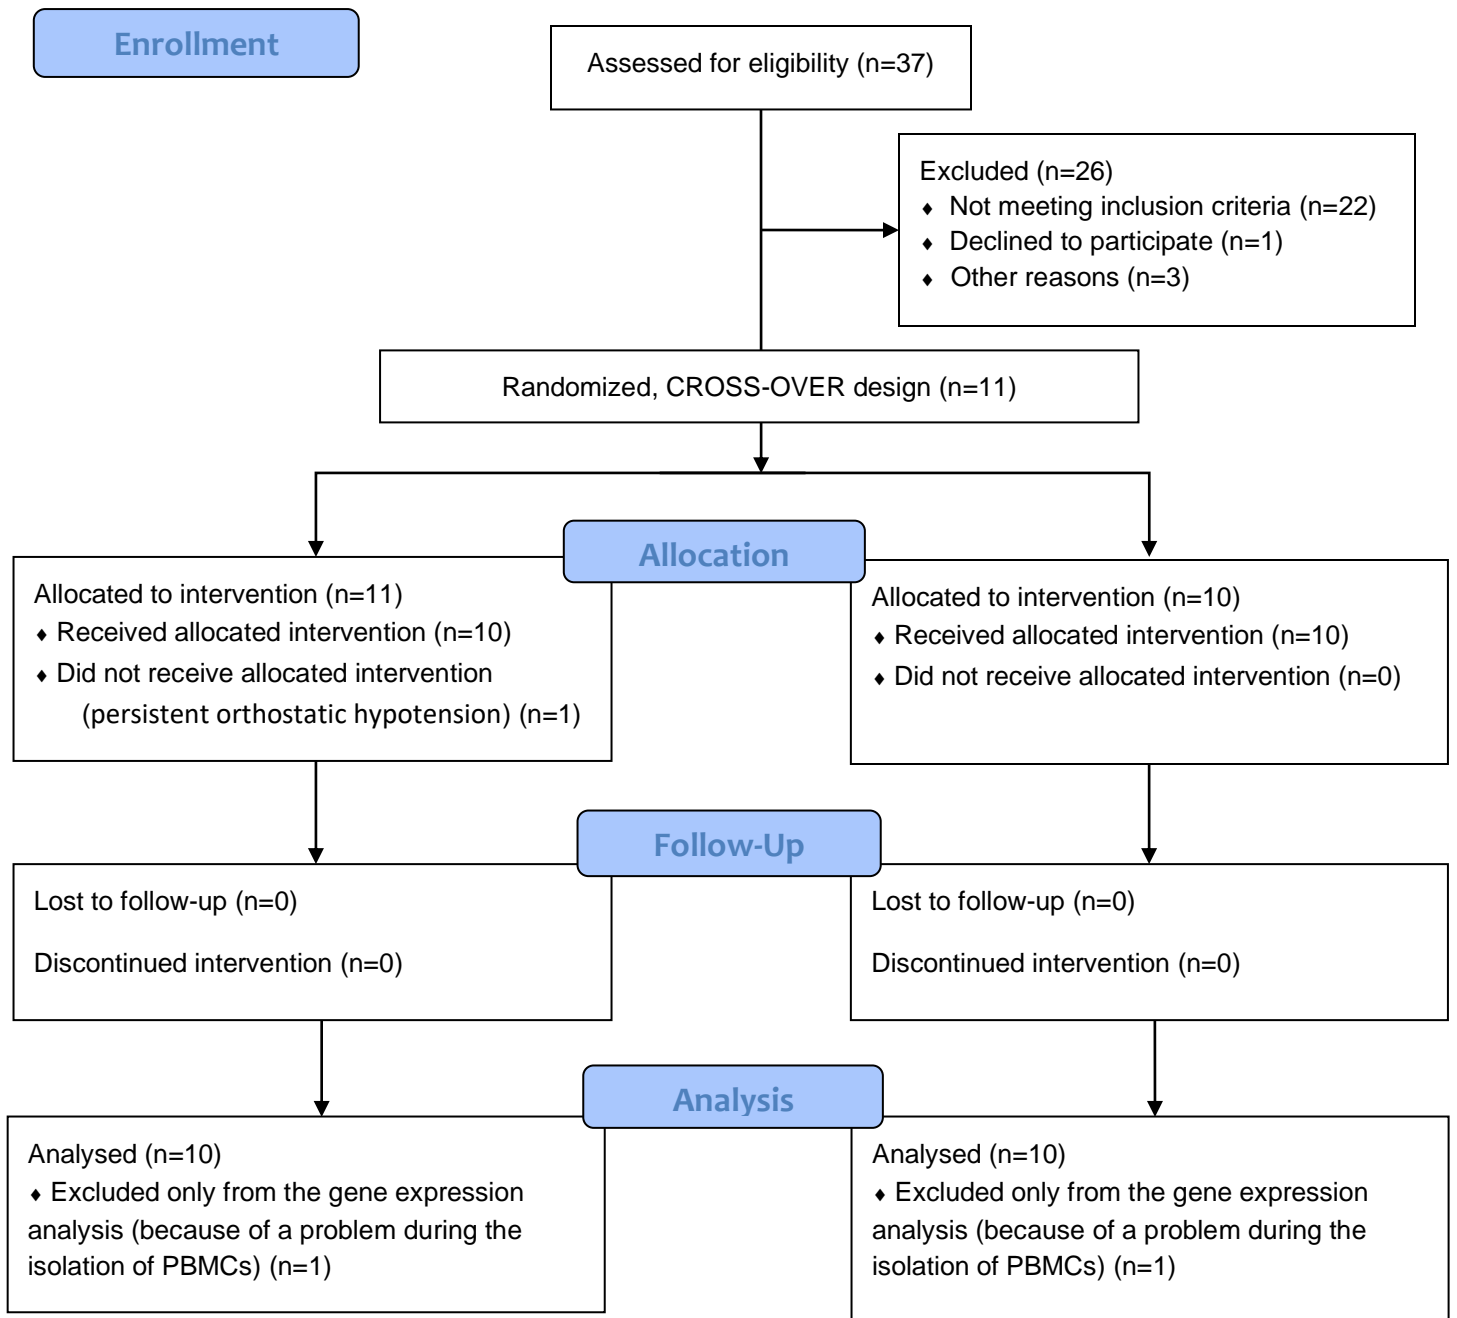

Supplement: repstand2 [file elife-62236-repstand2-v1.pdf]
