# Supplementary material for: Identification of human glucocorticoid response markers using integrated multi-omic analysis from a randomized crossover trial
Source: eLife. 2021 Apr 6;10:e62236. doi: 10.7554/eLife.62236 (PMC8024021; doi:10.7554/eLife.62236)
Supplement: Supplementary file 1. — (1) S file 1a. Transcriptomic analysis of peripheral blood mononuclear cells and adipose tissue from 7 AM (morning of the second intervention day) treated with hydrocortisone and saline (control). (2) S file 1b. miRNA with differential expression in plasma samples from 7 AM (morning of the second intervention day) treated with hydrocortisone and saline (control). (3) S file 1c. Gas chromatography-mass spectrometry (GC-MS) of serum samples from 7 AM (morning of the second intervention day) treated with hydrocortisone and saline (control). (4) S file 1d. Liquid chromatography-mass spectrometry (LC-MS) of serum samples from 7 AM (morning of the second intervention day) treated with hydrocortisone and saline (control). (5) S file 1e. The set of 59 genes with fold changes in the same directions in peripheral blood mononuclear cells (PBMCs) and adipose tissue transcriptomic data sets from 7 AM (morning of the second intervention day) treated with hydrocortisone and saline (control). (6) S file 1f. The order of the 11 clusters of ‘omic data in the correlation matrix. (7) S file 1g. Analysis of all ‘omic sets at 7 AM (morning of the second intervention day) treated with hydrocortisone and saline (control). (8) S file 1h. Biological pathways associated with differential gene expression in PBMCs between hydrocortisone and saline treated patients at 7 AM on the second intervention day. (9) S file 1i. The central gene in each network module arranged in hierarchical order as ranked by network centrality score. (10) S file 1j. Causal network analysis of the differential gene expression in PBMCs associated with glucocorticoid action. [file elife-62236-supp1.xlsx]

## Sheet: S file 1a - Transcriptomic Data
Supplementary file 1a. Transcriptomic analysis of peripheral blood mononuclear cells (PBMCs) and adipose tissue from 7 AM (morning of the second intervention day) treated with hydrocortisone and saline (control). Paired t-test with false discovery rate modified P-value (q) < 0.2, equivalent to P < 0.001.
PBMC						Adipose tissue
ID	Gene symbol	P-value	Fold change	FDR		ID	Gene symbol	P-value	Fold change	FDR
16821541	CRISPLD2	2.04264e-07	2.0728	1.18824e-07		16731441	ZBTB16	3.99e-08	5.47512	7.58975e-08	OVERLAP
17113147	TSC22D3	3.53664e-07	1.85709	1.74523e-07		16840846	PER1	8.44e-08	2.83567	1.31117e-07
16705961	DDIT4	3.31796e-06	2.95293	9.22367e-07		16950825	TIMP4	8.6e-07	2.08102	2.35521e-06
16669796	TXNIP	2.63467e-07	1.41691	1.54486e-06		16669796	TXNIP	2.8e-06	2.10458	2.96099e-06
16757160	ALDH2	1.46586e-06	1.42655	4.38088e-06		17068093	TACC1	8.57e-07	1.62841	2.96099e-06
16760928	CLEC4E	1.27963e-05	1.91852	5.32103e-06		17085449	---	2.06e-06	2.08866	2.96099e-06
16775386	LOC105370259	1.07914e-05	0.603622	5.80637e-06		16664359	CYP4B1	2.59e-06	2.13903	2.96099e-06
16763410	NELL2	1.77509e-06	0.724616	5.96996e-06		17125130	---	2.92e-06	2.29026	3.1036e-06
16889807	CD28	4.60653e-06	0.726285	7.10248e-06		17068134	---	4.34e-06	2.57068	3.3709e-06
16836311	NOG	1.71463e-05	0.633434	7.10248e-06		16879094	VIT	7.64e-06	2.0792	7.10718e-06
16663033	SMAP2	1.10877e-05	1.4351	9.17816e-06		17117533	ZBTB16	1.13e-05	3.13242	7.10718e-06
16782026	TRAJ49 /// TRAV20	1.09736e-05	0.713555	1.15815e-05		16863423	HIF3A	1.17e-05	1.92843	1.08377e-05
16923179	UBASH3A	6.70933e-06	0.757903	1.4716e-05		16906749	HECW2	1.34e-05	2.10786	1.08412e-05
17018497	FKBP5	3.04194e-05	1.54511	1.4716e-05		17068136	---	1.44e-05	2.70592	1.08412e-05
16777685	FLT3	6.04738e-05	2.04194	1.4716e-05		17019749	ADGRF5	1.11e-05	1.55792	1.86783e-05
16903140	CXCR4	5.39031e-05	1.70827	1.60338e-05		16993574	BTNL9	4.9e-05	1.76018	4.37941e-05
17106493	IL13RA1	5.92934e-05	1.81446	1.60338e-05		16690925	LOC105378909	6.07e-05	2.49424	4.37941e-05
16989202	TCF7	1.8196e-05	0.73603	1.61962e-05		16666326	ST6GALNAC3	6.2e-05	1.63087	4.47968e-05
17061210	DPY19L2P2	1.99175e-06	0.792853	1.87832e-05		16738400	APLNR	6.09e-05	-1.85149	4.6429e-05
16666357	AK5	2.621e-05	0.733178	1.87832e-05		16937725	SYN2	8.15e-05	2.34377	4.6429e-05
17106067	VSIG1	2.02935e-05	0.734674	1.91142e-05		17094761	KLF9	8.1e-05	1.95144	5.37516e-05
17056227	JAZF1	4.11627e-05	1.42759	1.98949e-05		16681142	TNFRSF25	3e-05	-1.44554	5.37516e-05
16864129	FLT3LG	3.41159e-05	0.71351	2.02274e-05		17059828	TFPI2	9.89e-05	-2.31676	5.96261e-05
17052625	TRBV24-1	0.000108242	0.564224	2.02274e-05		16815128	TBC1D24	2.81e-05	-1.40483	6.082e-05
16853631	EPB41L3	4.06096e-05	1.37902	2.07113e-05		17069338	CLVS1	5.93e-05	-1.57922	6.082e-05
17005197	RNF144B	7.47455e-05	1.55324	2.07113e-05		16664388	CYP4X1	0.000107365	1.61744	7.10559e-05
16782066	TRAC /// TRAJ29 /// TRDV2	9.10439e-05	0.605563	2.07113e-05		16672505	ATP1A2	0.000147301	2.34876	7.45169e-05
16781901	TRAV16	9.31211e-05	0.630657	2.07113e-05		16891575	ACSL3	2.52e-05	-1.31176	7.93882e-05
16882834	MAL	9.42779e-05	0.638211	2.07113e-05		16741725	PDE2A	8.04e-05	1.39207	7.93882e-05
16762992	LOC105369724	2.30575e-05	1.33391	2.09173e-05		17094453	LOC100133920 /// LOC101928195 /// LOC102724580 /// LOC102724904 /// LOC286297	0.000119963	1.76707	7.93882e-05
17011279	PRDM1	8.54776e-05	1.44511	2.63409e-05		16947715	SERPINI1	0.000141349	-2.32621	7.93882e-05
16860087	ZNF101	4.3993e-05	0.76897	3.36218e-05		17059955	PDK4	0.000181616	1.99124	7.93882e-05
16782090	TRAJ17	9.61175e-05	0.69304	3.36218e-05		16756649	ACACB	9.23e-05	1.54829	7.99747e-05
16999421	MARCH3	9.81537e-05	0.714813	3.36218e-05		16702175	PFKFB3	0.000171094	1.94321	9.12719e-05
16961250	WDR49	0.000161795	1.51555	3.36218e-05		17125250	---	0.000181447	1.95771	9.86323e-05
16781961	TRAV26-2	0.000167932	0.59435	3.36218e-05		16991208	GPX3	0.00020317	2.53555	9.86323e-05
17017224	LTB	0.000170368	0.632354	3.47517e-05		16703251	KIAA1217	2.82e-05	1.25261	0.000100092
17101292	STS	3.63652e-05	1.3061	3.54425e-05		16851067	CIDEA	0.000190682	1.52683	0.000122188
16782038	TRAJ43	0.000110071	0.69563	3.54425e-05		17067566	RBPMS	0.000136658	1.45757	0.000125744
16763608	PCED1B-AS1	2.78445e-05	0.78405	3.72514e-05		17075060	MIR548V	0.00036155	2.03585	0.00016701
16984287	PTGER4	1.8019e-05	1.25033	3.76833e-05		16859711	MAST3	0.000254917	-1.42876	0.0001778
16782018	TRAJ54	9.07978e-05	0.732639	3.76976e-05		16658536	PER3	0.000306586	-1.64773	0.0001778
16782044	TRAC /// TRAJ40 /// TRAV20	0.000163601	0.657096	3.76976e-05		16995500	LIFR	0.000378167	1.82526	0.0001778
16762126	LDHB	2.06089e-06	0.827053	3.86541e-05		16998823	NREP	0.000159828	-1.35708	0.000185542
16976211	IGFBP7	1.55413e-05	1.2355	3.86541e-05		17083433	IL33	0.000226579	-1.43957	0.000185542
16651007	---	0.000114749	1.38642	3.86541e-05		17094240	LOC101928195	0.000322406	1.48369	0.000203856
16827280	MIR328	0.000142768	1.39452	3.86541e-05		16968213	ANXA3	0.000364036	1.55534	0.000214364
17119050	---	0.000142768	1.39452	3.86541e-05		16729290	TSKU	0.000381774	1.67059	0.000214821
16788194	LOC105370652	0.000170391	0.694343	3.86541e-05		16845249	RAMP2-AS1	0.000354657	1.54095	0.000216201
16699643	SUSD4	0.000176128	0.683618	3.86541e-05		16919265	ZHX3	0.00041156	1.45683	0.00022439
16967863	AREG	0.000214331	1.86603	3.86541e-05		17068613	---	0.000462416	-1.47941	0.00022439
16781954	TRAV29DV5	0.0002302	0.66564	3.86541e-05		16814738	TMEM204	0.000447325	1.38873	0.00022724
16782020	TRAJ53	0.000258487	0.58447	3.97415e-05		16997393	ZBED3	0.000284038	1.29414	0.000227776
16781986	TRAV41	0.000240538	0.639044	4.1289e-05		16655801	---	0.000314771	-1.39853	0.000227776
16901161	TBC1D8	0.000151952	1.37151	4.13011e-05		16683960	MAP3K6	0.000328214	1.47367	0.000227776
16901568	EDAR	0.000156139	0.742469	4.13011e-05		17125112	---	0.000383528	1.5375	0.000227776
16651795	---	0.000236633	1.52412	4.30438e-05		16819539	ADGRG1	0.000424494	1.53092	0.000227776
16957312	GCSAM	0.000178553	0.720886	4.55952e-05		17092003	VLDLR-AS1	0.000431336	-1.59866	0.000227776
16912376	LOC105372589	0.000266425	0.620777	4.55952e-05		17076861	CEBPD	0.000442892	1.42385	0.000227776
16750416	PCED1B	0.00026979	0.679197	4.75151e-05		16880001	GTF2A1L /// STON1 /// STON1-GTF2A1L	0.000461543	1.50988	0.000227776
16731441	ZBTB16	0.000311439	1.60444	5.14896e-05		16681304	ERRFI1	0.000506758	2.10779	0.000227776
16975157	RELL1	0.000115245	1.30479	5.26664e-05		16763666	RAPGEF3	0.000510026	1.55096	0.000227776
16791444	GZMB	0.000231025	1.42856	5.26664e-05		16877555	RHOB	0.00051049	1.50847	0.000227776
16880122	SPTBN1	5.16801e-05	0.795312	5.41446e-05		17012447	LAMA2	0.000537115	2.03989	0.000227776
16969612	LEF1-AS1	0.000234164	0.708309	5.82267e-05		16856133	PQLC1	0.000330154	1.32369	0.00022785
17052252	TBXAS1	0.000164822	1.34087	5.86938e-05		16731461	NNMT	0.000651105	1.58837	0.00022785
16782058	TRAJ33 /// YME1L1	0.000182014	0.756784	5.94957e-05		16991192	GPX3	0.000705665	1.60385	0.000237524
16840846	PER1	0.000396507	1.63833	5.99933e-05		16715103	TYSND1	0.000186286	-1.25881	0.000254357
17021478	AKIRIN2	3.15377e-06	1.18535	5.99933e-05		16731605	SIDT2	0.00063428	1.33223	0.000254357
16761370	KLRC1	0.000224656	1.35219	6.09521e-05		17078452	HEY1	0.000728765	1.67474	0.000254357
16858970	ADGRE5	5.67599e-05	1.23421	6.14554e-05		16935593	TCF20	3.69e-05	1.17537	0.000257589
16793532	RTN1	0.000151637	1.30558	6.14554e-05		16675398	CFH	0.000577352	1.38041	0.000266196
16782114	TRAJ4	0.000215992	0.751669	6.14554e-05		17123028	---	0.000267023	1.21003	0.000268835
16782062	TRAJ31	0.000199675	0.746183	6.16896e-05		17094876	ZFAND5	0.000393588	1.36632	0.000268835
16782116	TRAC /// TRAJ3	0.000148308	0.775425	6.5034e-05		16935427	TOB2	0.000610462	1.36907	0.000268835
16980031	MAML3	0.000136977	1.29006	6.50355e-05		16978236	ADH1B	0.000779937	2.07847	0.000268835
16840113	CXCL16	0.000316073	1.41091	6.50355e-05		16944798	KALRN	0.000621407	1.38212	0.000277972
16782082	TRAJ21	0.000264114	0.722119	6.67346e-05		16883921	C2orf40	0.000390482	-1.24976	0.000287587
16670114	BCL9	0.00023229	0.763478	6.82796e-05		16938133	GALNT15	0.000788913	1.83087	0.000296263
16782122	TRAC /// TRAJ17 /// TRAV20 /// TRDV2	0.000107054	0.808808	6.85708e-05		16939439	MYRIP	0.000436488	1.37737	0.000299866
16782080	TRAJ22	0.000235175	0.750423	6.85708e-05		16942270	PTPRG	0.000687795	1.4169	0.000299866
16761316	LOC105369656	0.000319011	1.38678	6.85708e-05		16980727	---	0.000727264	-1.39881	0.000299866
17106200	MIR3978	0.000366599	1.42061	6.85708e-05		16699371	LOC102723886	0.000802667	-1.49956	0.000299866
17110670	PIM2	0.000379133	0.707101	6.85708e-05		16986473	ZBED3-AS1	0.00092252	1.61332	0.000299866
16782022	TRAJ52	0.000419482	0.680462	6.85708e-05		16996882	---	3.14e-05	1.15642	0.000317925
16703036	PLXDC2	0.000184153	1.31679	7.35283e-05		16985597	---	0.000141592	1.17686	0.000317925
16883753	---	0.000409212	1.44188	7.3877e-05		16721519	OR2AG1	0.00017842	-1.19751	0.000317925
16657383	---	0.000497931	1.46025	7.65562e-05		16818165	BCKDK	0.000196296	-1.23016	0.000317925
16782102	TRAC /// TRAJ10	0.000265761	0.755393	7.7281e-05		16771310	---	0.000383771	-1.26521	0.000317925
16775389	LOC101927121	0.00050834	0.6634	7.73979e-05		16666755	CLCA2	0.000673205	-1.32055	0.000318216
16718622	ABLIM1	0.000120465	0.810135	7.80451e-05		16889268	AOX1	0.000921479	1.74219	0.000318817
16749583	FAR2	0.000289868	1.33122	7.80451e-05		16785147	---	0.000250851	1.21256	0.000328068
16904484	SNORA70F	0.000666478	0.536635	7.95404e-05		16994597	FAM134B	0.000824947	1.39755	0.000331556
16910552	---	0.000581822	0.637732	8.04098e-05		16742812	---	0.000950445	-1.57671	0.000331556
17094761	KLF9	0.000521717	1.41182	8.24342e-05		16894001	RNASEH1	5.65e-05	-1.16206	0.000345018
16744939	TMPRSS4-AS1	7.04165e-05	1.21502	8.24342e-05		16778652	TSC22D1	0.000167892	1.17012	0.000345018
16782034	TRAJ45	0.000433193	0.734835	8.24342e-05		17014625	RPS6KA2-AS1	0.000463336	-1.25085	0.000345018
16667760	S1PR1	0.00043688	0.734775	8.24342e-05		16801789	TPM1	0.000976646	1.46687	0.000357878
16753670	IRAK3	0.000481427	1.46291	8.24342e-05		16774303	RGCC	0.000937048	-1.3978	0.00037441
16854509	DSC1	0.000517577	0.698779	8.24342e-05		16677723	HLX	0.000666814	-1.25068	0.000409939
16781827	TRAV2	0.000564246	0.688842	8.24342e-05		16703581	LINC01517	8.3e-05	1.15667	0.000414008
17126196	---	0.000427312	1.3531	8.32668e-05		16770848	NOS1	0.000247027	-1.18301	0.0004236
16738819	MS4A6A	0.00020039	1.27146	8.4872e-05		16850676	LOC105372013	0.00028201	1.18435	0.000424149
16782030	TRAJ47	0.00050768	0.7155	8.63056e-05		17022388	CD164	0.000590158	-1.2627	0.000427589
16768438	BTG1 /// LINC01619	0.00026688	1.28025	9.34199e-05		17066299	LOC105379311	0.000321355	1.18883	0.000428687
17014208	SYTL3	0.000214672	1.25651	9.432e-05		16717625	MRPL43	0.000663014	-1.23917	0.000448113
16926260	AATBC	0.000234082	1.25513	9.432e-05		16976029	KDR	0.000912634	-1.32768	0.000448113
16782070	TRAJ27	0.000285905	0.779986	9.432e-05		16982183	SORBS2	0.000967909	1.30476	0.000482825
16782112	TRAJ5	0.000560478	0.730348	9.432e-05		16697281	LINC01350	0.00054859	1.19934	0.000528097
16813825	LINS1	0.000132361	0.822945	9.90418e-05		16778392	FOXO1	0.000896909	1.28166	0.000544663
16971019	GAB1	0.000271952	1.25935	9.90418e-05		16805804	FAM138E	0.000688174	1.21377	0.000544663
16857736	MCEMP1	0.000496059	1.35209	0.000101304		16710228	PSTK	0.000541295	1.17404	0.00062095
17115677	GAB3	0.000180762	1.24417	0.000102571		16697668	---	0.000869995	1.21823	0.00062095
17024335	HIVEP2	0.000331588	0.786352	0.00010454		16781414	BMS1P17 /// BMS1P18	0.000498131	1.16443	0.000632406
16757831	CCDC64	0.000492234	0.758668	0.000105806		16869065	---	0.00017986	1.1429	0.000633311
16698697	FCMR	0.000518545	0.752727	0.000105806		17097914	PHF19	0.000335397	-1.17233	0.000633311
16760792	CD163	0.000816401	1.56089	0.000105806		17075014	MTUS1	0.000677107	1.18818	0.000633311
16725432	CD6	6.31479e-05	0.844995	0.000108825		17028297	---	0.000849894	-1.19895	0.000633311
17121922	---	0.00052323	0.742336	0.000108825		16968098	CXCL13	0.0001176	1.13635	0.000671493
16781967	TRAV35	0.00086164	0.642138	0.000108825		17027575	---	0.000592641	1.16297	0.000684108
16849148	RNF157	0.000585096	0.749633	0.000108862		16880293	---	0.000338326	1.15016	0.000719733
17052615	TRBV19	0.000742584	0.709455	0.000111066		16853611	---	0.000713197	1.17519	0.000719733
16991125	NDST1	0.000126742	1.20592	0.000114191		17013771	---	0.000860688	1.18624	0.000754814
17045269	EPDR1 /// NME8	0.000331609	1.27534	0.000114191		17051575	---	0.000581706	1.15752	0.000877109
16747236	LTBR	0.000166619	1.21605	0.000115851		16733377	FLI1	0.000747958	-1.17007	0.00093622
16734291	KRTAP5-4	0.000700028	1.3782	0.000116262		16712503	---	0.000620118	1.15626	0.000955084
17052671	TRBJ2-1 /// TRBV20OR9-2 /// TRBV25OR9-2 /// TRBV3-1 /// TRBV7-2	0.000784676	0.727999	0.000117673		17120192	---	0.000508696	1.14338	0.00110483
17056248	CPVL	0.000365723	1.27655	0.000118106		16967957	LOC101928809	0.000168486	1.11838	0.00118171
16978834	LEF1	0.000390029	0.79554	0.000118106		17071542	ODF1	0.00057559	1.12963	0.00127713
16928988	TCN2	0.000464458	1.29802	0.000118106		16986450	AGGF1	0.000677477	-1.14887	0.00127713
16683300	TCEA3	0.000473271	0.789062	0.000118106		16884369	LOC105373559	0.00070991	1.1408	0.00132679
17050350	LRRN3	0.000847212	0.722682	0.000118106		16768936	TMPO-AS1	0.000647639	-1.13175	0.00194946
16782014	TRAJ57	0.000854171	0.694355	0.000118106		16794257	---	0.000530602	-1.12528	0.00224372
16735732	---	0.00088622	1.46564	0.000118106		16844555	KRTAP3-1	0.000545249	1.10764	0.00262632
17063764	TRBV7-8	0.000951631	0.658467	0.000118106		16671671	TRIM46	0.000183255	1.09933	0.00266797
16781920	TRAV21	0.00100271	0.676297	0.000118106		16787451	LINC00642	0.000817002	1.11206	0.00269402
16911283	PLCB1	0.00104771	1.56512	0.000118106		16942616	LOC105377153	0.000737166	1.0994	0.0040538
17026762	---	0.00105575	0.656631	0.000118106		16702283	LOC105376391	0.000788849	1.09639	0.00457092
17029082	---	0.00105575	0.656631	0.000118106		16808710	---	0.000245782	1.08374	0.00595522
17031867	---	0.00105575	0.656631	0.000118106		16826460	SALL1	0.000810153	1.08848	0.00640382
17034339	---	0.00105575	0.656631	0.000118106		16977362	---	0.000720179	1.07824	0.0101366
17036587	---	0.00105575	0.656631	0.000118106
17039380	---	0.00105575	0.656631	0.000118106
17041863	---	0.00105575	0.656631	0.000118106
17052685	TRBC2 /// TRBV3-1 /// TRBV6-5 /// TRBV7-2	0.000161625	0.839221	0.000118893
16889160	PLCL1	0.000461664	0.77061	0.000118893
17122752	---	0.000724997	1.35715	0.00012112
16761726	PLBD1	0.000309868	1.26419	0.000121298
16781912	OR6C4 /// TRAV19 /// TRAV20	0.000625992	0.773886	0.000121298
16830041	ZFP3	0.00026777	0.820857	0.000126048
17081373	SLA	0.000370183	1.24672	0.000126048
16885546	PTPN18	0.000445206	1.24891	0.000126048
16782056	TRAJ34	0.000663005	0.770287	0.000126048
16945135	---	0.000877002	0.722806	0.000126048
16883756	---	0.000945183	1.40239	0.000126048
16925328	KCNE1	0.000948159	1.41155	0.000126048
16748227	KLRF1	0.00100219	1.43741	0.000126048
16890837	SLC11A1	0.00102375	1.53718	0.000126048
17123436	---	4.32256e-05	0.850564	0.000126222
16752244	DGKA	0.000121941	0.842849	0.000126222
17118988	---	0.000192905	1.19713	0.000126222
16911040	CDC25B	0.000266662	0.832659	0.000126222
16765657	TESPA1	0.000275924	0.823707	0.000126222
16805495	IGF1R	0.000281886	0.823677	0.000126222
17025417	AGPAT4	0.000425011	1.2376	0.000126222
16958354	---	0.000434343	1.25035	0.000126222
16782251	C14orf119	0.000498456	0.806063	0.000126222
16731795	CD3E	0.000519614	0.80215	0.000126222
17124752	---	0.000564489	1.26202	0.000126222
16980470	NR3C2	0.000570422	0.778172	0.000126222
16782050	TRAJ37	0.000619163	0.785038	0.000126222
17025177	DYNLT1	0.000683044	1.30565	0.000126222
16986777	RASGRF2	0.00068364	0.773887	0.000126222
16747439	GPR162	0.00069105	1.31667	0.000126222
17052683	TRBJ2-7 /// TRBV20OR9-2	0.000723155	0.779292	0.000126222
17119662	---	0.000723155	0.779292	0.000126222
16781877	TRAC /// TRAV8-4	0.000960955	0.728202	0.000126222
17119608	---	0.000962446	1.35647	0.000126222
16782028	TRAJ48	0.000986876	0.7244	0.000126222
16818842	CYLD	8.02232e-05	0.846442	0.000128948
16691436	LOC101929099	0.000274621	1.21672	0.000130074
16887702	ITGA6	0.000310912	0.822432	0.000132168
16850923	RAB31	0.000179487	1.1897	0.000135534
16756228	C12orf45	0.000188572	0.841933	0.000135534
16672669	LY9	0.000367645	0.826571	0.000137028
17098698	FAM102A	0.000603576	0.798547	0.000140189
17013507	SAMD5	0.000716587	1.27995	0.000141491
16904278	DPP4	0.000450281	0.817832	0.000146167
16889829	ICOS	0.00102811	0.754735	0.000146167
16695974	GPA33	0.000401893	0.823406	0.000146505
16944396	---	5.79449e-05	0.854172	0.000149219
16782092	TRAJ16	0.00107734	0.736649	0.000149987
17018995	OARD1	0.000388186	0.847238	0.00015018
16980974	FAM198B	0.000911859	1.31913	0.000152371
16943719	TRAT1	0.000605012	0.817355	0.000155798
17085901	ANXA1	0.00040323	1.23497	0.000156418
17124842	---	0.000509371	0.82082	0.000157579
16743816	PDGFD	0.000988454	1.30224	0.000162777
16660810	RCAN3	0.000863679	0.795297	0.000165488
16865554	NCR1	0.000533227	1.22089	0.000171217
16779839	KCTD12	0.000509763	1.2277	0.000172671
16844616	KRTAP4-4	0.000722027	1.24836	0.000175397
17119702	---	0.000779966	0.809961	0.000178085
17011593	FIG4	0.000182511	1.17662	0.000178637
16717005	PIK3AP1	0.000335507	1.19737	0.000186397
16839497	---	0.000188733	0.846854	0.000191893
16890027	LOC105373850 /// LOC105376761	0.000792458	0.792028	0.00019301
17093245	AQP3	0.000985498	0.801032	0.000195895
16870733	ZNF14	0.000485502	0.829905	0.000201823
16769777	CORO1C	0.000193743	1.17969	0.000201862
16753751	DYRK2	0.000362865	0.836072	0.000201967
16814528	CHTF18	0.000506041	1.194	0.000229707
16688949	LINC01461	0.000390349	1.17527	0.000235244
16807459	RMDN3	0.000719268	1.19713	0.000250232
16752703	NAB2	0.000821327	1.21733	0.000254275
17027801	---	0.000810749	1.19406	0.000256394
17033344	---	0.000810749	1.19406	0.000256394
16661497	THEMIS2	0.000773959	1.20985	0.000258187
16780509	DOCK9	0.00097136	0.819892	0.000296352
16657514	LINC01128	0.00103729	0.826245	0.000296352
16876810	---	0.000495679	0.842939	0.000309179
17119904	---	0.000666094	0.844599	0.00032148
17067190	DPYSL2	0.000924295	1.19762	0.000321747
17075082	ASAH1	0.00061977	1.19063	0.000328557
16871117	---	0.00021512	0.861786	0.000329123
16947287	TIPARP	0.000911452	1.20353	0.000329123
17026272	---	0.000976525	1.20265	0.000329123
17084493	GALT	0.000441324	0.850965	0.000331146
17122096	---	0.000825762	0.841778	0.000331903
17014364	IGF2R	0.00105273	1.19906	0.000334098
16916439	NSFL1C	0.000781575	1.19404	0.000336794
16960573	P2RY13	0.000993529	1.20529	0.000348962
16858386	LDLR	0.000810993	0.845366	0.000352811
16984562	PARP8	0.000248041	1.15281	0.000355549
16709739	EMX2	7.61146e-05	0.875779	0.000361127
16785086	SNAPC1	0.000325645	0.872434	0.00037948
16724633	PTPRJ	0.000438834	1.16192	0.00037948
16724744	OR5L1	0.00034603	0.857208	0.000413029
17030627	---	0.00101932	1.17494	0.000420905
17035425	---	0.00101932	1.17494	0.000420905
16837587	CD300A	0.00102343	1.18171	0.000434065
16819181	OGFOD1	0.000491279	0.861786	0.000440291
16832768	CPD	0.000726549	1.16543	0.000454274
17053401	GIMAP1 /// GIMAP1-GIMAP5 /// GIMAP5	0.00104532	0.850482	0.000485483
17095043	RFK	0.000540659	0.862449	0.000513443
16926813	IL17RA	0.000535897	1.14895	0.000556652
16967614	DCK /// MOB1B	0.000327558	0.880138	0.000577218
17071651	DCAF13	0.000875675	0.850841	0.000577218
16808109	TP53BP1	0.000354094	0.876037	0.000581449
17017025	LINC00243	0.000673913	0.867347	0.000585585
17034150	---	0.000673913	0.867347	0.000585585
16971167	SMAD1	0.000569018	1.14648	0.000593833
16946841	RNF13	0.000806931	1.1498	0.000622192
17120908	---	0.000132542	0.886066	0.0006369
17121884	---	0.000985227	0.859681	0.0006369
16993421	---	0.000262582	1.12952	0.000651184
16788339	EVL	0.00104792	0.863251	0.000670447
16935955	NUP50-AS1	0.00104149	1.15532	0.000683115
16985440	MAST4	0.000685011	0.875045	0.000683558
16971425	---	0.000636377	0.879889	0.000720393
16815425	ZNF75A	0.000760509	0.874034	0.000734147
17020231	---	0.000340374	0.883199	0.000784344
17089735	SPTAN1	0.000823373	0.875877	0.000784344
16871546	TYROBP	0.000742821	1.14441	0.000824984
16762921	FAM60A	0.000217281	0.892404	0.000833704
16843049	SSH2	0.000175314	1.12386	0.000854712
17101856	NHS	0.000869097	1.13298	0.00114753
16778392	FOXO1	0.000427291	0.891312	0.00116731
16935274	ENTHD1	0.000857426	0.882758	0.00126426
17121140	---	0.000802579	1.12476	0.00142614
17007844	---	0.00102087	0.894636	0.00154946
16851565	TTC39C	0.000868867	0.887488	0.00155508
16837326	PRKAR1A	0.000613311	1.11481	0.0015705
16855342	STARD6	0.000856786	0.891983	0.00174361
17074773	DEFB109P1	0.00044995	1.1058	0.00215651
17071815	---	0.000834371	0.895411	0.00224202
16692566	RNVU1-17	0.000306518	0.905267	0.00242424
16968246	BMP2K	0.000976666	1.10257	0.00336993
16824555	GDE1	0.000674162	1.09383	0.00461203
17035686	---	0.000705977	1.09017	0.00471969
17038418	---	0.000705977	1.09017	0.00471969
17040967	---	0.000705977	1.09017	0.00471969
16860691	KIAA0355	0.000870573	0.915738	0.0048796
16763512	SLC38A1	0.000749891	0.916668	0.00528776
16685099	KIAA0319L	0.000283512	1.08428	0.00562365
16665447	USP1	0.000807624	0.919444	0.00631983
16853120	TSHZ1	0.000274685	0.925516	0.00720354
16937351	ARPC4 /// ARPC4-TTLL3 /// TTLL3	4.05265e-05	1.0646	0.0150988
16792287	FBXO33	0.000888569	1.06436	0.0203919

## Sheet: S file 1b - miRNA
Supplementary file 1b. miRNA with differential expression in plasma samples from 7 AM (morning of the second intervention day) treated with hydrocortisone and saline (control). Paired t-test and Wilcoxon test P-values presented. Gene targets in the the 234 genes with differential gene expression were derived from ingenuity pathway analysis and the overlaps are shown in the Venn diagram and table.
																																	ID	Symbol	Exp Fold Change	Source	Confidence	ID	Symbol	Exp P-value	Exp Fold Change	Pathway
Assay	Average dcq morning_day2_treatment_P	Fold change morning_day2_treatment_C / morning_day2_treatment_P	t-test P-value	Wilcoxon test P-value																													hsa-miR-122-5p	miR-122-5p (miRNAs w/seed GGAGUGU)	-3.214	TargetScan Human	Moderate (predicted)	17075082	ASAH1	0.001	1.191	Ceramide Degradation,Sphingosine and Sphingosine-1-phosphate Metabolism,Sphingosine-1-phosphate Signaling
hsa-miR-425-3p	-2.25072	1.4637	0.0062588	0.00413518																													hsa-miR-122-5p	miR-122-5p (miRNAs w/seed GGAGUGU)	-3.214	TargetScan Human	Moderate (predicted)	16725432	CD6	0	-1.183
hsa-miR-186-5p	-4.65941	2.17376	0.00435443	0.00519604																													hsa-miR-122-5p	miR-122-5p (miRNAs w/seed GGAGUGU)	-3.214	TargetScan Human	Moderate (predicted)	16854509	DSC1	0.001	-1.431
hsa-miR-15b-5p	-0.0816317	1.63566	0.0161378	0.0114962																													hsa-miR-122-5p	miR-122-5p (miRNAs w/seed GGAGUGU)	-3.214	TargetScan Human	High (predicted)	17098698	FAM102A	0.001	-1.252
hsa-miR-550a-5p	-8.63249	4.37977	0.000594877	0.015873																													hsa-miR-122-5p	miR-122-5p (miRNAs w/seed GGAGUGU)	-3.214	TargetScan Human	High (predicted)	17018497	FKBP5	0	1.545	Glucocorticoid Receptor Signaling,NRF2-mediated Oxidative Stress Response
hsa-miR-95-3p	-5.20511	-4.9484	0.00692379	0.015873																													hsa-miR-122-5p	miR-122-5p (miRNAs w/seed GGAGUGU)	-3.214	TargetScan Human	High (predicted)	16805495	IGF1R	0	-1.214	Cardiac Hypertrophy Signaling,Estrogen-Dependent Breast Cancer Signaling,Glioblastoma Multiforme Signaling,Glioma Signaling,Growth Hormone Signaling,Hepatic Fibrosis / Hepatic Stellate Cell Activation,Huntington's Disease Signaling,IGF-1 Signaling,Myc Mediated Apoptosis Signaling,NF-κB Signaling,PTEN Signaling,RhoA Signaling,Role of NFAT in Cardiac Hypertrophy,STAT3 Pathway,Synaptic Long Term Dep…
hsa-miR-16-1-3p	-5.56141	2.6278	0.0359449	0.0172119																													hsa-miR-122-5p	miR-122-5p (miRNAs w/seed GGAGUGU)	-3.214	TargetScan Human	Moderate (predicted)	16999421	MARCH3	0	-1.399
hsa-miR-576-5p	-5.24326	1.93376	0.0216297	0.0232306																													hsa-miR-122-5p	miR-122-5p (miRNAs w/seed GGAGUGU)	-3.214	TargetScan Human	Moderate (predicted)	17081373	SLA	0	1.247
hsa-miR-122-5p	0.4428	-3.21425	0.0319423	0.0432571																													hsa-miR-200a-3p	miR-141-3p (and other miRNAs w/seed AACACUG)	-2.142	TargetScan Human	Moderate (predicted)	16858970	ADGRE5	0	1.234
hsa-miR-200a-3p	-6.51141	-2.14249	0.0261547	0.0464007																													hsa-miR-200a-3p	miR-141-3p (and other miRNAs w/seed AACACUG)	-2.142	TargetScan Human	Moderate (predicted)	16670114	BCL9	0	-1.31	Regulation of the Epithelial-Mesenchymal Transition Pathway,Wnt/β-catenin Signaling
																																	hsa-miR-200a-3p	miR-141-3p (and other miRNAs w/seed AACACUG)	-2.142	TargetScan Human	Moderate (predicted)	16760792	CD163	0.001	1.561	Glucocorticoid Receptor Signaling
																																	hsa-miR-200a-3p	miR-141-3p (and other miRNAs w/seed AACACUG)	-2.142	TargetScan Human	High (predicted)	16911040	CDC25B	0	-1.201	3-phosphoinositide Biosynthesis,3-phosphoinositide Degradation,Cell Cycle: G2/M DNA Damage Checkpoint Regulation,D-myo-inositol (1,4,5,6)-Tetrakisphosphate Biosynthesis,D-myo-inositol (3,4,5,6)-tetrakisphosphate Biosynthesis,D-myo-inositol-5-phosphate Metabolism,Mitotic Roles of Polo-Like Kinase,Molecular Mechanisms of Cancer,p38 MAPK Signaling,Protein Kinase A Signaling,Superpathway of Inositol …
																																	hsa-miR-200a-3p	miR-141-3p (and other miRNAs w/seed AACACUG)	-2.142	TargetScan Human	High (predicted)	16769777	CORO1C	0	1.18
																																	hsa-miR-200a-3p	miR-141-3p (and other miRNAs w/seed AACACUG)	-2.142	TargetScan Human	High (predicted)	16832768	CPD	0.001	1.165
																																	hsa-miR-200a-3p	miR-141-3p (and other miRNAs w/seed AACACUG)	-2.142	TargetScan Human	High (predicted)	17018497	FKBP5	0	1.545	Glucocorticoid Receptor Signaling,NRF2-mediated Oxidative Stress Response
																																	hsa-miR-200a-3p	miR-141-3p (and other miRNAs w/seed AACACUG)	-2.142	TargetScan Human	High (predicted)	16971019	GAB1	0	1.259	14-3-3-mediated Signaling,3-phosphoinositide Biosynthesis,Actin Cytoskeleton Signaling,Acute Myeloid Leukemia Signaling,Aldosterone Signaling in Epithelial Cells,AMPK Signaling,Amyotrophic Lateral Sclerosis Signaling,Angiopoietin Signaling,Antiproliferative Role of Somatostatin Receptor 2,Axonal Guidance Signaling,B Cell Receptor Signaling,Breast Cancer Regulation by Stathmin1,Cardiac Hypertrophy…
																																	hsa-miR-200a-3p	miR-141-3p (and other miRNAs w/seed AACACUG)	-2.142	TargetScan Human	High (predicted)	16805495	IGF1R	0	-1.214	Cardiac Hypertrophy Signaling,Estrogen-Dependent Breast Cancer Signaling,Glioblastoma Multiforme Signaling,Glioma Signaling,Growth Hormone Signaling,Hepatic Fibrosis / Hepatic Stellate Cell Activation,Huntington's Disease Signaling,IGF-1 Signaling,Myc Mediated Apoptosis Signaling,NF-κB Signaling,PTEN Signaling,RhoA Signaling,Role of NFAT in Cardiac Hypertrophy,STAT3 Pathway,Synaptic Long Term Dep…
																																	hsa-miR-200a-3p	miR-141-3p (and other miRNAs w/seed AACACUG)	-2.142	TargetScan Human	High (predicted)	16887702	ITGA6	0	-1.216	Agranulocyte Adhesion and Diapedesis,Agrin Interactions at Neuromuscular Junction,Caveolar-mediated Endocytosis Signaling,CDK5 Signaling,Germ Cell-Sertoli Cell Junction Signaling,Granulocyte Adhesion and Diapedesis,Integrin Signaling,Leukocyte Extravasation Signaling,NF-κB Activation by Viruses,Paxillin Signaling,Reelin Signaling in Neurons,Role of Tissue Factor in Cancer,Virus Entry via Endocyti…
																																	hsa-miR-200a-3p	miR-141-3p (and other miRNAs w/seed AACACUG)	-2.142	TargetScan Human	Moderate (predicted)	17056227	JAZF1	0	1.428
																																	hsa-miR-200a-3p	miR-141-3p (and other miRNAs w/seed AACACUG)	-2.142	TargetScan Human	High (predicted)	16779839	KCTD12	0.001	1.228
																																	hsa-miR-200a-3p	miR-141-3p (and other miRNAs w/seed AACACUG)	-2.142	TargetScan Human	Moderate (predicted)	16672669	LY9	0	-1.21
																																	hsa-miR-200a-3p	miR-141-3p (and other miRNAs w/seed AACACUG)	-2.142	TargetScan Human	Moderate (predicted)	16819181	OGFOD1	0	-1.16
																																	hsa-miR-200a-3p	miR-141-3p (and other miRNAs w/seed AACACUG)	-2.142	TargetScan Human	Moderate (predicted)	16889160	PLCL1	0	-1.298	14-3-3-mediated Signaling,Aldosterone Signaling in Epithelial Cells,Antioxidant Action of Vitamin C,Axonal Guidance Signaling,Cardiac Hypertrophy Signaling,Cellular Effects of Sildenafil (Viagra),CREB Signaling in Neurons,Dendritic Cell Maturation,Dopamine-DARPP32 Feedback in cAMP Signaling,Endothelin-1 Signaling,Gap Junction Signaling,Glioblastoma Multiforme Signaling,GPCR-Mediated Integration o…
																																	hsa-miR-200a-3p	miR-141-3p (and other miRNAs w/seed AACACUG)	-2.142	TargetScan Human	Moderate (predicted)	17011279	PRDM1	0	1.445
																																	hsa-miR-200a-3p	miR-141-3p (and other miRNAs w/seed AACACUG)	-2.142	TargetScan Human	High (predicted)	16837326	PRKAR1A	0.001	1.115	AMPK Signaling,Amyloid Processing,Androgen Signaling,Axonal Guidance Signaling,BMP signaling pathway,Breast Cancer Regulation by Stathmin1,Calcium Signaling,cAMP-mediated signaling,Cardiac Hypertrophy Signaling,Cardiac β-adrenergic Signaling,CDK5 Signaling,Cellular Effects of Sildenafil (Viagra),Colorectal Cancer Metastasis Signaling,Corticotropin Releasing Hormone Signaling,CREB Signaling in Neu…
																																	hsa-miR-200a-3p	miR-141-3p (and other miRNAs w/seed AACACUG)	-2.142	TargetScan Human	Moderate (predicted)	16984287	PTGER4	0	1.25	cAMP-mediated signaling,Colorectal Cancer Metastasis Signaling,Eicosanoid Signaling,G-Protein Coupled Receptor Signaling,Gαs Signaling
																																	hsa-miR-15b-5p	miR-16-5p (and other miRNAs w/seed AGCAGCA)	1.636	TargetScan Human	High (predicted)	16757831	CCDC64	0	-1.318
																																	hsa-miR-15b-5p	miR-16-5p (and other miRNAs w/seed AGCAGCA)	1.636	TargetScan Human	High (predicted)	16760792	CD163	0.001	1.561	Glucocorticoid Receptor Signaling
																																	hsa-miR-15b-5p	miR-16-5p (and other miRNAs w/seed AGCAGCA)	1.636	TargetScan Human	High (predicted)	16889807	CD28	0	-1.377	3-phosphoinositide Biosynthesis,Allograft Rejection Signaling,Altered T Cell and B Cell Signaling in Rheumatoid Arthritis,Autoimmune Thyroid Disease Signaling,CD28 Signaling in T Helper Cells,Communication between Innate and Adaptive Immune Cells,Crosstalk between Dendritic Cells and Natural Killer Cells,CTLA4 Signaling in Cytotoxic T Lymphocytes,Graft-versus-Host Disease Signaling,iCOS-iCOSL Sig…
																																	hsa-miR-15b-5p	miR-16-5p (and other miRNAs w/seed AGCAGCA)	1.636	TargetScan Human	Moderate (predicted)	16731795	CD3E	0.001	-1.247	Calcium-induced T Lymphocyte Apoptosis,CCR5 Signaling in Macrophages,CD28 Signaling in T Helper Cells,Cdc42 Signaling,CTLA4 Signaling in Cytotoxic T Lymphocytes,Cytotoxic T Lymphocyte-mediated Apoptosis of Target Cells,Glucocorticoid Receptor Signaling,Hematopoiesis from Pluripotent Stem Cells,iCOS-iCOSL Signaling in T Helper Cells,Lipid Antigen Presentation by CD1,Nur77 Signaling in T Lymphocyte…
																																	hsa-miR-15b-5p	miR-16-5p (and other miRNAs w/seed AGCAGCA)	1.636	TargetScan Human	High (predicted)	16911040	CDC25B	0	-1.201	3-phosphoinositide Biosynthesis,3-phosphoinositide Degradation,Cell Cycle: G2/M DNA Damage Checkpoint Regulation,D-myo-inositol (1,4,5,6)-Tetrakisphosphate Biosynthesis,D-myo-inositol (3,4,5,6)-tetrakisphosphate Biosynthesis,D-myo-inositol-5-phosphate Metabolism,Mitotic Roles of Polo-Like Kinase,Molecular Mechanisms of Cancer,p38 MAPK Signaling,Protein Kinase A Signaling,Superpathway of Inositol …
																																	hsa-miR-15b-5p	miR-16-5p (and other miRNAs w/seed AGCAGCA)	1.636	TargetScan Human	High (predicted)	16832768	CPD	0.001	1.165
																																	hsa-miR-15b-5p	miR-16-5p (and other miRNAs w/seed AGCAGCA)	1.636	TargetScan Human	High (predicted)	16818842	CYLD	0	-1.181
																																	hsa-miR-15b-5p	miR-16-5p (and other miRNAs w/seed AGCAGCA)	1.636	TargetScan Human	High (predicted)	16753751	DYRK2	0	-1.196
																																	hsa-miR-15b-5p	miR-16-5p (and other miRNAs w/seed AGCAGCA)	1.636	TargetScan Human	High (predicted)	16901568	EDAR	0	-1.347
																																	hsa-miR-15b-5p	miR-16-5p (and other miRNAs w/seed AGCAGCA)	1.636	TargetScan Human	High (predicted)	16762921	FAM60A	0	-1.121
																																	hsa-miR-15b-5p	miR-16-5p (and other miRNAs w/seed AGCAGCA)	1.636	TargetScan Human	High (predicted)	16792287	FBXO33	0.001	1.064
																																	hsa-miR-15b-5p	miR-16-5p (and other miRNAs w/seed AGCAGCA)	1.636	TargetScan Human	High (predicted)	17018497	FKBP5	0	1.545	Glucocorticoid Receptor Signaling,NRF2-mediated Oxidative Stress Response
																																	hsa-miR-15b-5p	miR-16-5p (and other miRNAs w/seed AGCAGCA)	1.636	Ingenuity Expert Findings,TargetScan Human	Experimentally Observed,High (predicted)	16777685	FLT3	0	2.042	Acute Myeloid Leukemia Signaling,FLT3 Signaling in Hematopoietic Progenitor Cells
																																	hsa-miR-15b-5p	miR-16-5p (and other miRNAs w/seed AGCAGCA)	1.636	TargetScan Human	High (predicted)	16778392	FOXO1	0	-1.122	14-3-3-mediated Signaling,Adipogenesis pathway,AMPK Signaling,Angiopoietin Signaling,B Cell Receptor Signaling,Cancer Drug Resistance By Drug Efflux,Cell Cycle: G1/S Checkpoint Regulation,Docosahexaenoic Acid (DHA) Signaling,ErbB Signaling,ErbB2-ErbB3 Signaling,FXR/RXR Activation,Glioblastoma Multiforme Signaling,HER-2 Signaling in Breast Cancer,Human Embryonic Stem Cell Pluripotency,IGF-1 Signal…
																																	hsa-miR-15b-5p	miR-16-5p (and other miRNAs w/seed AGCAGCA)	1.636	Ingenuity Expert Findings,TargetScan Human	Experimentally Observed,High (predicted)	16805495	IGF1R	0	-1.214	Cardiac Hypertrophy Signaling,Estrogen-Dependent Breast Cancer Signaling,Glioblastoma Multiforme Signaling,Glioma Signaling,Growth Hormone Signaling,Hepatic Fibrosis / Hepatic Stellate Cell Activation,Huntington's Disease Signaling,IGF-1 Signaling,Myc Mediated Apoptosis Signaling,NF-κB Signaling,PTEN Signaling,RhoA Signaling,Role of NFAT in Cardiac Hypertrophy,STAT3 Pathway,Synaptic Long Term Dep…
																																	hsa-miR-15b-5p	miR-16-5p (and other miRNAs w/seed AGCAGCA)	1.636	TarBase,TargetScan Human	Experimentally Observed,High (predicted)	17014364	IGF2R	0.001	1.199	Glioma Signaling,NF-κB Signaling,PTEN Signaling,STAT3 Pathway
																																	hsa-miR-15b-5p	miR-16-5p (and other miRNAs w/seed AGCAGCA)	1.636	TargetScan Human	High (predicted)	16844616	KRTAP4-4	0.001	1.248
																																	hsa-miR-15b-5p	miR-16-5p (and other miRNAs w/seed AGCAGCA)	1.636	TargetScan Human	High (predicted)	17050350	LRRN3	0.001	-1.384
																																	hsa-miR-15b-5p	miR-16-5p (and other miRNAs w/seed AGCAGCA)	1.636	TargetScan Human	High (predicted)	16672669	LY9	0	-1.21
																																	hsa-miR-15b-5p	miR-16-5p (and other miRNAs w/seed AGCAGCA)	1.636	TargetScan Human	High (predicted)	16724633	PTPRJ	0	1.162	3-phosphoinositide Biosynthesis,3-phosphoinositide Degradation,D-myo-inositol (1,4,5,6)-Tetrakisphosphate Biosynthesis,D-myo-inositol (3,4,5,6)-tetrakisphosphate Biosynthesis,D-myo-inositol-5-phosphate Metabolism,Protein Kinase A Signaling,Superpathway of Inositol Phosphate Compounds
																																	hsa-miR-15b-5p	miR-16-5p (and other miRNAs w/seed AGCAGCA)	1.636	TargetScan Human	High (predicted)	17095043	RFK	0.001	-1.159	Flavin Biosynthesis IV (Mammalian)
																																	hsa-miR-15b-5p	miR-16-5p (and other miRNAs w/seed AGCAGCA)	1.636	TargetScan Human	High (predicted)	17005197	RNF144B	0	1.553
																																	hsa-miR-15b-5p	miR-16-5p (and other miRNAs w/seed AGCAGCA)	1.636	TarBase	Experimentally Observed	16763512	SLC38A1	0.001	-1.091	Glutamate Receptor Signaling
																																	hsa-miR-15b-5p	miR-16-5p (and other miRNAs w/seed AGCAGCA)	1.636	TargetScan Human	High (predicted)	16663033	SMAP2	0	1.435
																																	hsa-miR-15b-5p	miR-16-5p (and other miRNAs w/seed AGCAGCA)	1.636	TargetScan Human	High (predicted)	17113147	TSC22D3	0	1.857	Glucocorticoid Receptor Signaling
																																	hsa-miR-15b-5p	miR-16-5p (and other miRNAs w/seed AGCAGCA)	1.636	TargetScan Human	High (predicted)	16669796	TXNIP	0	1.417	Adipogenesis pathway
																																	hsa-miR-186-5p	miR-186-5p (miRNAs w/seed AAAGAAU)	2.174	TargetScan Human	High (predicted)	16968246	BMP2K	0.001	1.103
																																	hsa-miR-186-5p	miR-186-5p (miRNAs w/seed AAAGAAU)	2.174	TargetScan Human	High (predicted)	16832768	CPD	0.001	1.165
																																	hsa-miR-186-5p	miR-186-5p (miRNAs w/seed AAAGAAU)	2.174	TargetScan Human	High (predicted)	16818842	CYLD	0	-1.181
																																	hsa-miR-186-5p	miR-186-5p (miRNAs w/seed AAAGAAU)	2.174	TargetScan Human	High (predicted)	16792287	FBXO33	0.001	1.064
																																	hsa-miR-186-5p	miR-186-5p (miRNAs w/seed AAAGAAU)	2.174	miRecords	Experimentally Observed	16778392	FOXO1	0	-1.122	14-3-3-mediated Signaling,Adipogenesis pathway,AMPK Signaling,Angiopoietin Signaling,B Cell Receptor Signaling,Cancer Drug Resistance By Drug Efflux,Cell Cycle: G1/S Checkpoint Regulation,Docosahexaenoic Acid (DHA) Signaling,ErbB Signaling,ErbB2-ErbB3 Signaling,FXR/RXR Activation,Glioblastoma Multiforme Signaling,HER-2 Signaling in Breast Cancer,Human Embryonic Stem Cell Pluripotency,IGF-1 Signal…
																																	hsa-miR-186-5p	miR-186-5p (miRNAs w/seed AAAGAAU)	2.174	TargetScan Human	High (predicted)	17024335	HIVEP2	0	-1.272
																																	hsa-miR-186-5p	miR-186-5p (miRNAs w/seed AAAGAAU)	2.174	TargetScan Human	High (predicted)	16805495	IGF1R	0	-1.214	Cardiac Hypertrophy Signaling,Estrogen-Dependent Breast Cancer Signaling,Glioblastoma Multiforme Signaling,Glioma Signaling,Growth Hormone Signaling,Hepatic Fibrosis / Hepatic Stellate Cell Activation,Huntington's Disease Signaling,IGF-1 Signaling,Myc Mediated Apoptosis Signaling,NF-κB Signaling,PTEN Signaling,RhoA Signaling,Role of NFAT in Cardiac Hypertrophy,STAT3 Pathway,Synaptic Long Term Dep…
																																	hsa-miR-186-5p	miR-186-5p (miRNAs w/seed AAAGAAU)	2.174	TargetScan Human	High (predicted)	16860691	KIAA0355	0.001	-1.092
																																	hsa-miR-186-5p	miR-186-5p (miRNAs w/seed AAAGAAU)	2.174	TargetScan Human	High (predicted)	16836311	NOG	0	-1.579	BMP signaling pathway,Factors Promoting Cardiogenesis in Vertebrates,Human Embryonic Stem Cell Pluripotency
																																	hsa-miR-186-5p	miR-186-5p (miRNAs w/seed AAAGAAU)	2.174	TargetScan Human	High (predicted)	17011279	PRDM1	0	1.445
																																	hsa-miR-186-5p	miR-186-5p (miRNAs w/seed AAAGAAU)	2.174	TargetScan Human	Moderate (predicted)	16785086	SNAPC1	0	-1.146
																																	hsa-miR-186-5p	miR-186-5p (miRNAs w/seed AAAGAAU)	2.174	TargetScan Human	High (predicted)	16947287	TIPARP	0.001	1.204	Death Receptor Signaling,Retinoic acid Mediated Apoptosis Signaling,UVA-Induced MAPK Signaling
																																	hsa-miR-186-5p	miR-186-5p (miRNAs w/seed AAAGAAU)	2.174	TargetScan Human	High (predicted)	16669796	TXNIP	0	1.417	Adipogenesis pathway
																																	hsa-miR-550a-5p	miR-550a-5p (and other miRNAs w/seed GUGCCUG)	4.38	TargetScan Human	Moderate (predicted)	16753751	DYRK2	0	-1.196
																																	hsa-miR-550a-5p	miR-550a-5p (and other miRNAs w/seed GUGCCUG)	4.38	TargetScan Human	Moderate (predicted)	16709739	EMX2	0	-1.142
																																	hsa-miR-550a-5p	miR-550a-5p (and other miRNAs w/seed GUGCCUG)	4.38	TargetScan Human	Moderate (predicted)	16788339	EVL	0.001	-1.158
																																	hsa-miR-550a-5p	miR-550a-5p (and other miRNAs w/seed GUGCCUG)	4.38	TargetScan Human	Moderate (predicted)	16805495	IGF1R	0	-1.214	Cardiac Hypertrophy Signaling,Estrogen-Dependent Breast Cancer Signaling,Glioblastoma Multiforme Signaling,Glioma Signaling,Growth Hormone Signaling,Hepatic Fibrosis / Hepatic Stellate Cell Activation,Huntington's Disease Signaling,IGF-1 Signaling,Myc Mediated Apoptosis Signaling,NF-κB Signaling,PTEN Signaling,RhoA Signaling,Role of NFAT in Cardiac Hypertrophy,STAT3 Pathway,Synaptic Long Term Dep…
																																	hsa-miR-550a-5p	miR-550a-5p (and other miRNAs w/seed GUGCCUG)	4.38	TargetScan Human	High (predicted)	16925328	KCNE1	0.001	1.412
																																	hsa-miR-550a-5p	miR-550a-5p (and other miRNAs w/seed GUGCCUG)	4.38	TargetScan Human	Moderate (predicted)	16975157	RELL1	0	1.305
																																	hsa-miR-550a-5p	miR-550a-5p (and other miRNAs w/seed GUGCCUG)	4.38	TargetScan Human	Moderate (predicted)	17013507	SAMD5	0.001	1.28
																																	hsa-miR-550a-5p	miR-550a-5p (and other miRNAs w/seed GUGCCUG)	4.38	TargetScan Human	Moderate (predicted)	16989202	TCF7	0	-1.359	Adipogenesis pathway,PEDF Signaling,Prolactin Signaling
																																	hsa-miR-550a-5p	miR-550a-5p (and other miRNAs w/seed GUGCCUG)	4.38	TargetScan Human	High (predicted)	16851565	TTC39C	0.001	-1.127
																																	hsa-miR-550a-5p	miR-550a-5p (and other miRNAs w/seed GUGCCUG)	4.38	TargetScan Human	Moderate (predicted)	16830041	ZFP3	0	-1.218
																																	hsa-miR-576-5p	miR-576-5p (miRNAs w/seed UUCUAAU)	1.934	TargetScan Human	Moderate (predicted)	16762921	FAM60A	0	-1.121
																																	hsa-miR-576-5p	miR-576-5p (miRNAs w/seed UUCUAAU)	1.934	TargetScan Human	Moderate (predicted)	16753670	IRAK3	0	1.463	Hepatic Cholestasis,IL-1 Signaling,IL-8 Signaling,iNOS Signaling,NF-κB Signaling,p38 MAPK Signaling,Role of Macrophages, Fibroblasts and Endothelial Cells in Rheumatoid Arthritis,Toll-like Receptor Signaling

## Sheet: S file 1c - GC-MS metabolome
Supplementary file 1c. Gas chromatography-mass spectrometry (GC-MS) of serum samples from 7 AM (morning of the second intervention day) treated with hydrocortisone and saline (control). Paired t-test , P < 0.05.
Row annotation 1	P-value	Fold change	FDR
m TRYPTOPHAN,N,N,O-TMS 1 M/z405	1.25354e-05	0.689966	0.00017304
m DOCOSAHEXAENOIC ACID-TMS 1	0.000173569	1.3806	0.51055
RI 2184 M/z 192 1 Kynurenine tri-TMS	0.00060824	0.757977	0.0026694
m OCTADECADIENOIC ACID, 9,12-(Z,Z)-TMS 1	0.00479929	1.40523	0.28302
m TYROSINE,N,O,O-TMS 1 M/z383	0.00682481	0.772565	0.002639
m HEPTADECANOIC ACID-TMS 1 M/z327	0.0103006	1.27445	0.67596
m URACIL-2TMS 1 M/z257	0.0186413	1.13915	0.67596
m CITRIC ACID-4TMS 1 M/z466	0.0193766	1.26833	0.67596
m CHOLESTEROL-TMS 1 M/z458	0.0221521	1.08335	0.28302
m LACTIC ACID, O,O-TMS_1 1 M/z191	0.0231666	1.13284	0.67596
m HEXADECANOIC ACID-TMS 1	0.0241621	1.26244	0.71477
m OCTADECENOIC ACID,-9-(Z)-TMS 1 M/z340	0.0250655	1.54595	0.342
m ARABITOL-5TMS 2 M/z308	0.0256678	0.885088	0.026978
m EICOSATETRAENOIC ACID, 5,8,11,14-(Z,Z,Z,Z,)-TMS 1 M/z91	0.0283523	1.13525	0.67596
RI 1862 M/z 155 1 M/z186	0.0307584	1.1554	0.67596
m GLUTAMINE,N,N,N,O-TMS_3 1 M/z346	0.0325982	1.16074	0.77489
m MALIC ACID-3TMS 1 M/z335	0.032781	1.29532	0.67596
m 2-OXOISOCAPROIC ACID-MEOX TMS 1 M/z216	0.0397209	1.20949	0.98359
m 2-AMINOBUTYRIC ACID, O,N-TMS 2 M/z232	0.042944	1.35226	0.67596
m ASPARAGINE,N,N,O-TMS 1 M/z348	0.0443505	1.20026	0.95204
m GLUTAMINE,N,N,O-TMS_1 1 M/z348	0.0461343	1.21746	0.95204

## Sheet: S file 1d - LC-MS metabolome
Supplementary file 1d. Liquid chromatography-mass spectrometry (LC-MS) of serum samples from 7 AM (morning of the second intervention day) treated with hydrocortisone and saline (control). Paired t-test , P < 0.05.
Mass@RT	Compound name \ sample name	IDENTIFIED with MS/MS	P-value	Fold change	FDR
362.207@4.20	SMC#0236 Cortisol	Yes, manually	3.81122e-08	751.877	5.4982e-07
204.09@1.81	SMC#0134 L-Tryptophan	Yes	1.08897e-05	0.788408	0.053403
204.091@2.08	SMC#0134 L-Tryptophan	Yes	5.09977e-05	0.820182	0.034987
208.084@1.56	SMC#0131 L-Kynurenine	N/A	0.000128783	0.711665	0.020517
181.07@1.00	SMC#0135 DL-Tyrosine	Yes	0.000244291	0.802843	0.033722
181.074@0.79	SMC#0135 DL-Tyrosine	Yes	0.000292134	0.760037	0.033722
280.24@6.87	SMC#0041 Linoleic acid (18:2)	N/A	0.00413283	1.62317	0.033722
278.225@6.62	SMC#0040 α-Linolenic Acid (18:3)	N/A	0.00645214	1.48394	0.03385
165.079@1.61	SMC#0137 Phenylalanine	N/A	0.0115645	1.05396	0.59992
254.224@6.77	SMC#0051 cis-9-palmitoleic acid (16:1)	N/A	0.0127744	1.48594	0.020517
316.226@4.61	SMC#0596 Decanoyl-L-carnitine (C10)	Yes	0.0129532	1.64107	0.033722
165.079@1.41	SMC#0137 Phenylalanine	Yes	0.0158471	1.20266	0.12154
288.213@4.04	SMC#0595 L-Octanoylcarnitine (C8)	N/A	0.0186373	1.58103	0.034987
256.24@7.08	SMC#0050 Palmitic acid (16:0)	N/A	0.0193578	1.3111	0.05733
169.076@1.56	SMC#0498 Norepinephrine (noradrenaline) {expRT}	N/A	0.0198138	0.446701	0.033722
282.256@7.13	SMC#0031 Oleic acid (18:1)	N/A	0.0225732	1.34406	0.05733
400.319@5.88	SMC#0600 Palmitoyl-L-carnitine (C16)	Yes	0.0396795	1.17002	0.21695

## Sheet: S file 1e - The 59 genes
Supplementary file 1e. The set of 59 genes with fold-changes in the same directions in peripheral blood mononuclear cells (PBMCs) and adipose tissue transcriptomic data sets from 7 AM (morning of the second intervention day) treated with hydrocortisone and saline (control).
	Affyemtrix #	meanImp	medianImp	minImp	maxImp	normHits	decision	Gene_symbol		PBMC FC	PBMC P	ADIP FC	ADIP P
	17094876	1.25169	1.40606	-1.001	2.59742	0.69697	Confirmed	ZFAND5		1.09585	0.0112223	1.36632	0.000393588
	16745113	1.38325	1.41121	0	2.56804	0.757576	Confirmed	BCL9L		0.851172	0.0133313	0.82122	0.00608522
	17080897	2.18265	2.12547	1.29264	3.13919	0.989899	Confirmed	MTSS1		1.21223	0.0216225	1.22234	0.0241808
	17083319	0.640205	1.001	-1.001	1.72619	0.353535	Tentative	JAK2		1.30118	0.0079226	1.25629	0.0292297
	16967614	2.18458	2.1975	1.001	3.2613	0.969697	Confirmed	DCK		0.880144	0.000327313	0.848626	0.036714
	16883733	0.655261	1.001	-1.001	1.92634	0.383838	Tentative	IL18RAP		1.31603	0.0146765	1.12875	0.0369778
	16911835	2.17808	2.21308	1.001	3.22118	0.959596	Confirmed	RIN2		1.20998	0.00216814	1.09711	0.0390562
	16658802	1.3465	1.40275	-0.108467	2.28776	0.767677	Confirmed	KIF1B		1.14655	0.0408209	1.08399	0.0404308
	16873398	0.632105	1.001	-1.001	1.73367	0.343434	Tentative	FBXO46		0.873856	0.0320094	0.868303	0.0441793
	17073078	0.624119	1.001	-1.001	1.98957	0.393939	Tentative	DENND3		1.27622	0.00888664	1.16718	0.057961
	17067190	2.2162	2.2112	1.001	3.32678	0.979798	Confirmed	DPYSL2		1.19763	0.000923936	1.10578	0.0599861
	16989202	2.19386	2.19884	1.001	3.48049	0.989899	Confirmed	TCF7		0.736034	1.81851e-05	0.885952	0.0860651
	16723400	1.34591	1.41286	-1.001	2.56686	0.727273	Confirmed	HIPK3		1.13812	0.005156	1.07428	0.102533
	17045258	1.45691	1.41705	-1.001	2.33393	0.838384	Confirmed	EPDR1 /// GPR141		1.32271	0.0126672	1.06343	0.111052
	17024144	1.40317	1.41705	0	2.7119	0.808081	Confirmed	IFNGR1		1.21703	0.00201014	1.11741	0.114953
	16887179	1.37083	1.4139	0	2.6235	0.777778	Confirmed	CERS6		1.07549	0.0144877	1.17506	0.129507
	17123744	2.07173	2.0487	0	3.37785	0.969697	Confirmed	---		1.42766	0.00174086	1.0918	0.137062
	17000854	2.11744	2.18035	0	3.41042	0.959596	Confirmed	TAF7		0.898901	0.0100639	0.829078	0.146798
	17036587	2.22369	2.19597	1.001	3.16096	0.979798	Confirmed	---		0.656626	0.00105594	0.840017	0.183939
	17026762	2.2219	2.18035	0	3.61604	0.979798	Confirmed	---		0.656626	0.00105594	0.840017	0.183939
	17029082	2.20287	2.30724	0	3.16738	0.969697	Confirmed	---		0.656626	0.00105594	0.840017	0.183939
	17034339	2.18429	2.16559	1.001	3.50675	0.969697	Confirmed	---		0.656626	0.00105594	0.840017	0.183939
	17041863	2.17809	2.20071	0	3.1638	0.969697	Confirmed	---		0.656626	0.00105594	0.840017	0.183939
	17039380	2.12497	2.16033	1.001	3.45802	0.979798	Confirmed	---		0.656626	0.00105594	0.840017	0.183939
	17031867	2.11958	2.12761	0	3.23221	0.969697	Confirmed	---		0.656626	0.00105594	0.840017	0.183939
	16894119	0.728498	1.001	0	1.99755	0.424242	Tentative	CMPK2 /// NRIR		1.18573	0.00601301	1.10804	0.228009
	16804409	0.571052	0.447303	-1.001	1.94464	0.313131	Tentative	---		1.39171	0.0353881	1.17999	0.23811
	16893694	1.25974	1.40275	-1.001	2.79378	0.69697	Confirmed	---		1.09759	0.0414333	1.04841	0.238707
	16760792	2.20483	2.21031	0	3.25211	0.959596	Confirmed	CD163		1.56086	0.00081648	1.27498	0.286025
	16683300	2.11153	2.13166	1.001	3.31058	0.959596	Confirmed	TCEA3		0.789056	0.000473014	0.904116	0.291223
	17098698	2.19952	2.19697	1.001	3.15923	0.969697	Confirmed	FAM102A		0.798544	0.000602951	0.912104	0.308326
	17099701	1.28705	1.40275	-1.001	2.73724	0.69697	Confirmed	MIR3689D2		1.1595	0.00239568	1.08619	0.341056
	17046673	0.593053	1.001	-1.001	1.72087	0.313131	Tentative	LOC100996437		0.925953	0.012847	0.934716	0.341425
	16871305	0.635191	1.001	-1.001	2.11136	0.40404	Tentative	ZNF792		0.860856	0.00516953	0.899042	0.347464
	16676562	1.56816	1.59403	0	2.54156	0.848485	Confirmed	SRGAP2 /// SRGAP2B /// SRGAP2D		1.24701	0.011238	1.0707	0.425704
	17068606	1.33176	1.41286	0	2.40226	0.767677	Confirmed	---		1.29428	0.0092729	1.07603	0.467447
	16796262	1.39523	1.41705	-0.232508	2.31624	0.828283	Confirmed	SERPINA1		1.23342	0.00351056	1.04342	0.525892
	16992557	0.623858	1.001	-1.001	1.95604	0.323232	Tentative	CPEB4		1.12823	0.0135053	1.04418	0.529304
	17111769	1.23415	1.38062	0	2.42601	0.717172	Confirmed	PJA1		0.784935	0.00469511	0.936331	0.562095
	16747958	1.34145	1.40835	0	2.3767	0.777778	Confirmed	CLEC6A		1.41585	0.00485366	1.04253	0.583616
	16653485	1.44968	1.41705	0	2.47735	0.787879	Confirmed	---		1.51273	0.00560812	1.10002	0.590577
	17118066	1.43952	1.4139	-1.001	2.452	0.808081	Confirmed	LOC441081		1.4312	0.0128862	1.14448	0.625262
	17118127	1.4167	1.41121	-1.001	2.58669	0.767677	Confirmed	LOC101929599 /// LOC101929812 /// LOC102724994 /// LOC102724995 /// LOC105369229		1.4312	0.0128862	1.14448	0.625262
	17118058	1.35675	1.4139	0	2.31184	0.79798	Confirmed	LOC643784 /// LOC728093		1.4312	0.0128862	1.14448	0.625262
	17118104	1.3139	1.41286	-1.001	2.55872	0.737374	Confirmed	---		1.4312	0.0128862	1.14448	0.625262
	16708269	1.36841	1.41286	-0.277371	2.44091	0.777778	Confirmed	WNT8B		1.23114	0.00150894	1.03562	0.666072
	16725468	1.19237	1.38062	-1.001	2.72528	0.717172	Confirmed	CD5		0.804105	0.00457615	0.971132	0.670481
	17067284	2.12105	2.1395	1.001	3.46318	0.969697	Confirmed	EPHX2		0.723545	0.00123608	0.965113	0.699549
	16776411	1.36627	1.41286	0	2.38302	0.777778	Confirmed	LINC00399		1.13157	0.00130377	1.02556	0.705521
	16786167	2.09799	2.13844	0	3.24821	0.979798	Confirmed	PSEN1		1.11114	0.0126182	1.02493	0.738397
	17051191	1.23149	1.38943	0	2.79524	0.717172	Confirmed	LOC101928451		1.24907	0.00439364	1.0387	0.750397
	16703642	0.603245	1.001	0	2.57897	0.313131	Tentative	MAP3K8		1.21403	0.0051969	1.02091	0.808268
	16678128	0.75202	1.001	0	2.00321	0.373737	Tentative	H3F3A /// H3F3AP4		1.13493	0.0297658	1.01951	0.818382
	17111895	2.18672	2.17884	0	3.30433	0.959596	Confirmed	IL2RG		0.903057	0.00421583	0.950811	0.819838
	16670114	2.02464	2.07098	1.001	2.81802	0.939394	Confirmed	BCL9		0.763476	0.000232371	0.982228	0.862274
	17052252	2.19686	2.23392	1.001	3.40265	0.989899	Confirmed	TBXAS1		1.34088	0.000164652	1.03241	0.862892
	17056734	1.29078	1.40275	-1.001	2.38114	0.737374	Confirmed	AOAH-IT1		1.4359	0.0105108	1.02016	0.868385
	16725112	2.0466	2.04284	0	3.02024	0.949495	Confirmed	OR10Y1P /// STX3		1.23886	0.00232884	1.00677	0.914337
	16662430	0.606266	1.001	-1.001	1.9944	0.363636	Tentative	AGO4		1.19517	0.0339662	1.00433	0.937422

## Sheet: S file 1f - CorrelationClusters
Supplementary file 1f. The order of the 11 clusters of 'omic data in the correlation matrix. The 11 clusters are colored up and ordered vertically as the they appear in Figure 5-figure supplement 1, Column one = data order as entered into the analysis (V1 onwards), column 2 = miRNA and metabolomic data, column 3 = gene code for gene expression data in PBMCs, column 4 = gene with differential expr…
	V21	16762992	LOC105369724
	V108	16912376	LOC105372589
	V101	16651795	---
	V125	16840113	CXCL16
	V64	16793532	RTN1
	V80	17011593	FIG4
	V71	16747236	LTBR
	V220	16871546	TYROBP
	V223	16661497	THEMIS2
	V94	16761370	KLRC1
	V193	16837326	PRKAR1A
	V263	17093245	AQP3
	V134	16808109	TP53BP1
	V228	17121140	---
	V135	16753751	DYRK2
	V213	16807459	RMDN3
	V222	16815425	ZNF75A
	V221	16763512	SLC38A1
	V42	16818842	CYLD
	V187	16971167	SMAD1
	V277	16935955	NUP50-AS1
	V60	16980031	MAML3
	V85	17118988	---
	V212	17013507	SAMD5
	V208	16734291	KRTAP5-4
	V332	hsa-miR-200a-3p	#N/A
	V139	17081373	SLA
	V255	16883756	---						SMAD1	NSFL1C	LEF1	TXNIP	CDC25B	FKBP5	TP53BP1	ZBTB16	IGF1R	GAB1	FOXO1	EPB41L3	LDHB	CYLD	USP1	SPTAN1	PER1	LTBR	UBASH3A	IGF2R	TIRAP	BMP2K	DYRK2	PRDM1	DYNLT1
	V1	16821541	CRISPLD2					1	2.50923	0	0	0	0	0	3.29905	0	0	0	0	1.66436	0	0	0	3	0	13.9063	0	0	0	0	3.78304	0	0	28.162
	V66	16901568	EDAR					2	2.50923	5.71619	0	0	1.07948	0	0	0	0	5.61118	0	3.32872	0	4.18453	0	5.99999	0	0	5.10958	6.02889	0	0	7.56608	0	0	47.1339
	V75	16843049	SSH2					3	0	5.71619	0	0	1.07948	0	9.89716	5.66885	0	5.61118	0	0	0	0	0	4	0	0	0	0	0	0	0	0	0	31.9729
	V291	m DOCOSAHEXAENOIC ACID-TMS 1	#N/A					4	0	0	0	0	1.07948	0	0	5.66885	0	0	3.26236	0	0	0	0	0.999999	4.84184	0	5.10958	0	0	0	0	25.4121	0	46.3743
	V27	16853631	EPB41L3					5	0	0	7.34649	0	0	0	3.29905	0	0	5.61118	0	0	0	0	0	4	0	0	0	6.02889	0	0	0	0	7.81742	34.103
	V70	17052252	TBXAS1					6	0	0	0	4.34164	1.07948	3.30541	3.29905	0	0	2.80559	0	0	2.61106	0	0	2	0	0	5.10958	0	0	0	3.78304	0	0	28.3348
	V147	16883753	---					7	5.01845	0	0	0	1.07948	0	0	0	0	0	0	0	2.61106	0	0	0	0	0	0	0	0	0	0	0	7.81742	16.5264
	V131	16717005	PIK3AP1					8	2.50923	0	0	0	0	0	0	0	2.08194	0	0	0	0	0	0	4.99999	0	0	0	0	0	0	0	0	0	9.59116
	V136	17056248	CPVL					9	5.01845	0	0	0	2.15895	3.30541	3.29905	5.66885	2.08194	2.80559	0	1.66436	2.61106	0	0	4	0	0	5.10958	6.02889	0	4.32869	0	0	0	48.0808
	V18	16984287	PTGER4					10	0	0	0	0	0	0	0	0	0	0	0	0	0	0	7.21818	0	0	0	0	6.02889	0	0	3.78304	0	0	17.0301
	V155	16724633	PTPRJ					11	0	0	0	0	0	3.30541	3.29905	5.66885	0	0	0	0	0	0	7.21818	0.999999	0	0	0	0	0	0	3.78304	0	0	24.2745
	V78	17115677	GAB3						255.31	255.31	255.31	255.31	255.31	255.31	255.31	255.31	255.31	255.31	255.31	255.31	255.31	255.31	255.31	255.31	255.31	255.31	255.31	255.31	255.31	255.31	255.31	255.31	255.31
	V314	SMC#0135 DL-Tyrosine	#N/A
	V29	17056227	JAZF1
	V137	17106200	MIR3978
	V36	17106493	IL13RA1
	V280	16911283	PLCB1
	V40	17005197	RNF144B
	V103	16984562	PARP8
	V15	16760928	CLEC4E
	V163	16753670	IRAK3
	V122	16761726	PLBD1
	V273	16890837	SLC11A1
	V82	16703036	PLXDC2
	V218	16832768	CPD
	V88	16738819	MS4A6A
	V253	16980974	FAM198B
	V67	16961250	WDR49
	V261	16968246	BMP2K
	V290	m TRYPTOPHAN,N,N,O-TMS 1 M/z405	#N/A
	V316	SMC#0134 L-Tryptophan	#N/A
	V330	hsa-miR-16-1-3p	#N/A
	V335	hsa-miR-576-5p	#N/A
	V98	16926260	AATBC
	V234	16760792	CD163
	V254	17067190	DPYSL2
	V195	17075082	ASAH1
	V304	RI 1862 M/z 155 1 M/z186	#N/A
	V297	m CITRIC ACID-4TMS 1 M/z466	#N/A
	V207	16747439	GPR162
	V307	m 2-OXOISOCAPROIC ACID-MEOX TMS 1 M/z216	#N/A
	V309	m ASPARAGINE,N,N,O-TMS 1 M/z348	#N/A
	V312	SMC#0137 Phenylalanine	#N/A
	V132	17020231	---
	V217	17122752	---
	V324	SMC#0595 L-Octanoylcarnitine (C8)	#N/A
	V325	SMC#0596 Decanoyl-L-carnitine (C10)	#N/A															0
	V107	16993421	---
	V127	16785086	SNAPC1
	V39	16744939	TMPRSS4-AS1
	V327	SMC#0600 Palmitoyl-L-carnitine (C16)	#N/A
	V266	16743816	PDGFD
	V129	17045269	EPDR1 /// NME8
	V318	SMC#0131 L-Kynurenine	#N/A
	V289	16782092	TRAJ16
	V76	16699643	SUSD4
	V157	16885546	PTPN18
	V113	16971019	GAB1
	V225	16916439	NSFL1C
	V124	16731441	ZBTB16
	V57	16991125	NDST1
	V79	16782058	TRAJ33 /// YME1L1
	V121	16692566	RNVU1-17
	V120	16749583	FAR2
	V267	16748227	KLRF1
	V331	hsa-miR-186-5p	#N/A
	V65	16901161	TBC1D8
	V174	16779839	KCTD12
	V246	17101856	NHS
	V315	SMC#0135 DL-Tyrosine	#N/A
	V9	16705961	DDIT4
	V90	17014208	SYTL3
	V14	16663033	SMAP2
	V43	17011279	PRDM1
	V329	hsa-miR-15b-5p	#N/A
	V3	17113147	TSC22D3
	V96	16791444	GZMB
	V317	SMC#0134 L-Tryptophan	#N/A
	V333	hsa-miR-425-3p	#N/A
	V126	16761316	LOC105369656
	V292	RI 2184 M/z 192 1 Kynurenine tri-TMS	#N/A
	V150	16778392	FOXO1
	V310	m GLUTAMINE,N,N,O-TMS_1 1 M/z348	#N/A
	V144	16840846	PER1
	V186	17124752	---
	V86	16769777	CORO1C
	V227	16890027	LOC105373850 /// LOC105376761
	V334	hsa-miR-550a-5p	#N/A
	V89	16967863	AREG
	V116	16691436	LOC101929099
	V10	16889807	CD28
	V245	16851565	TTC39C
	V143	16978834	LEF1
	V302	m ARABITOL-5TMS 2 M/z308	#N/A
	V22	16666357	AK5
	V176	16854509	DSC1
	V299	m LACTIC ACID, O,O-TMS_1 1 M/z191	#N/A
	V298	m CHOLESTEROL-TMS 1 M/z458	#N/A
	V306	m MALIC ACID-3TMS 1 M/z335	#N/A
	V54	16975157	RELL1
	V294	m TYROSINE,N,O,O-TMS 1 M/z383	#N/A
	V12	16775386	LOC105370259
	V55	16718622	ABLIM1
	V37	16777685	FLT3
	V173	16775389	LOC101927121
	V110	16768438	BTG1 /// LINC01619
	V146	17085901	ANXA1
	V165	16819181	OGFOD1
	V204	17025177	DYNLT1
	V160	16889160	PLCL1
	V180	17121922	---
	V28	16937351	ARPC4 /// ARPC4-TTLL3 /// TTLL3
	V166	16757831	CCDC64
	V203	16824555	GDE1
	V256	16925328	KCNE1
	V74	17017224	LTB
	V178	16731795	CD3E
	V50	16782122	TRAC /// TRAJ17 /// TRAV20 /// TRDV2
	V240	16782014	TRAJ57
	V128	16967614	DCK /// MOB1B
	V264	17121884	---
	V236	17089735	SPTAN1
	V226	17052671	TRBJ2-1 /// TRBV20OR9-2 /// TRBV25OR9-2 /// TRBV3-1 /// TRBV7-2
	V215	17052683	TRBJ2-7 /// TRBV20OR9-2
	V216	17119662	---
	V95	16781954	TRAV29DV5
	V68	17052685	TRBC2 /// TRBV3-1 /// TRBV6-5 /// TRBV7-2
	V154	16667760	S1PR1
	V11	16923179	UBASH3A
	V112	16750416	PCED1B
	V104	16782020	TRAJ53
	V109	16911040	CDC25B
	V276	16657514	LINC01128
	V175	17124842	---
	V196	16781912	OR6C4 /// TRAV19 /// TRAV20
	V278	17053401	GIMAP1 /// GIMAP1-GIMAP5 /// GIMAP5
	V185	16781827	TRAV2
	V46	16781901	TRAV16
	V140	17110670	PIM2
	V251	16792287	FBXO33
	V61	16827280	MIR328
	V62	17119050	---
	V243	16781967	TRAV35
	V148	16782022	TRAJ52
	V269	16781920	TRAV21
	V191	17098698	FAM102A
	V288	17041863	---
	V287	17039380	---
	V286	17036587	---
	V285	17034339	---
	V284	17031867	---
	V282	17026762	---
	V283	17029082	---
	V49	16999421	37681
	V184	16782112	TRAJ5
	V13	16782026	TRAJ49 /// TRAV20
	V231	16858386	LDLR
	V2	16669796	TXNIP
	V279	16788339	EVL
	V7	16762126	LDHB
	V197	16971425	---
	V156	17084493	GALT
	V311	SMC#0137 Phenylalanine	#N/A
	V308	m 2-AMINOBUTYRIC ACID, O,N-TMS 2 M/z232	#N/A
	V319	SMC#0051 cis-9-palmitoleic acid (16:1)	#N/A
	V303	m EICOSATETRAENOIC ACID, 5,8,11,14-(Z,Z,Z,Z,)-TMS 1 M/z91	#N/A
	V322	SMC#0041 Linoleic acid (18:2)	#N/A
	V323	SMC#0031 Oleic acid (18:1)	#N/A
	V321	SMC#0040 α-Linolenic Acid (18:3)	#N/A
	V293	m OCTADECADIENOIC ACID, 9,12-(Z,Z)-TMS 1	#N/A
	V301	m OCTADECENOIC ACID,-9-(Z)-TMS 1 M/z340	#N/A
	V295	m HEPTADECANOIC ACID-TMS 1 M/z327	#N/A
	V300	m HEXADECANOIC ACID-TMS 1	#N/A
	V320	SMC#0050 Palmitic acid (16:0)	#N/A
	V41	16709739	EMX2
	V249	16945135	---
	V38	16725432	CD6
	V183	17095043	RFK
	V274	16837587	CD300A
	V111	16830041	ZFP3
	V56	16752244	DGKA
	V58	16813825	LINS1
	V52	16782038	TRAJ43
	V45	16782066	TRAC /// TRAJ29 /// TRDV2
	V99	16969612	LEF1-AS1
	V194	16782050	TRAJ37
	V5	16763410	NELL2
	V238	17071815	---
	V242	16935274	ENTHD1
	V117	16805495	IGF1R
	V159	17074773	DEFB109P1
	V224	17119702	---
	V296	m URACIL-2TMS 1 M/z257	#N/A
	V17	16836311	NOG
	V170	16782251	C14orf119
	V30	17123436	---
	V31	16860087	ZNF101
	V97	16670114	BCL9
	V190	16849148	RNF157
	V84	16756228	C12orf45
	V177	16698697	FCMR
	V25	16864129	FLT3LG
	V47	16882834	MAL
	V141	17018995	OARD1
	V145	16695974	GPA33
	V164	16870733	ZNF14
	V241	16855342	STARD6
	V158	16904278	DPP4
	V192	16943719	TRAT1
	V102	16781986	TRAV41
	V130	17024335	HIVEP2
	V20	17106067	VSIG1
	V77	16957312	GCSAM
	V162	16683300	TCEA3
	V114	16765657	TESPA1
	V123	16887702	ITGA6
	V59	17120908	---
	V239	17050350	LRRN3
	V247	16860691	KIAA0355
	V201	17017025	LINC00243
	V202	17034150	---
	V206	16985440	MAST4
	V275	16889829	ICOS
	V265	16782028	TRAJ48
	V23	16763608	PCED1B-AS1
	V32	16880122	SPTBN1
	V105	16782082	TRAJ21
	V260	16780509	DOCK9
	V87	16782062	TRAJ31
	V100	16782080	TRAJ22
	V237	17122096	---
	V270	17007844	---
	V172	16782030	TRAJ47
	V72	16781961	TRAV26-2
	V198	16782056	TRAJ34
	V92	16782114	TRAJ4
	V138	16672669	LY9
	V152	16782034	TRAJ45
	V69	16782044	TRAC /// TRAJ40 /// TRAV20
	V48	16782090	TRAJ17
	V63	16782116	TRAC /// TRAJ3
	V119	16782070	TRAJ27
	V106	16782102	TRAC /// TRAJ10
	V4	16757160	ALDH2
	V118	16685099	KIAA0319L
	V93	16762921	FAM60A
	V235	16752703	NAB2
	V188	16980470	NR3C2
	V205	16986777	RASGRF2
	V8	17021478	AKIRIN2
	V244	16660810	RCAN3
	V19	16989202	TCF7
	V219	17052615	TRBV19
	V200	16904484	SNORA70F
	V257	17063764	TRBV7-8
	V171	16814528	CHTF18
	V250	16735732	---
	V305	m GLUTAMINE,N,N,N,O-TMS_3 1 M/z346	#N/A
	V281	17014364	IGF2R
	V211	17040967	---
	V209	17035686	---
	V210	17038418	---
	V182	16926813	IL17RA
	V262	17026272	---
	V232	17027801	---
	V233	17033344	---
	V271	17030627	---
	V272	17035425	---
	V6	17061210	DPY19L2P2
	V133	16724744	OR5L1
	V34	16858970	ADGRE5
	V73	16788194	LOC105370652
	V169	16657383	---
	V151	17126196	---
	V259	17119608	---
	V149	17025417	AGPAT4
	V181	16865554	NCR1
	V16	16976211	IGFBP7
	V313	SMC#0498 Norepinephrine (noradrenaline) {expRT}	#N/A
	V26	17101292	STS
	V53	16651007	---
	V81	16850923	RAB31
	V91	16871117	---
	V229	16946841	RNF13
	V44	16782018	TRAJ54
	V230	16665447	USP1
	V168	16876810	---
	V153	16958354	---
	V252	16947287	TIPARP
	V268	16960573	P2RY13
	V161	16928988	TCN2
	V258	16781877	TRAC /// TRAV8-4
	V51	17052625	TRBV24-1
	V336	hsa-miR-95-3p	#N/A
	V214	16844616	KRTAP4-4
	V328	hsa-miR-122-5p	#N/A
	V24	17018497	FKBP5
	V199	17119904	---
	V115	16853120	TSHZ1
	V248	17071651	DCAF13
	V33	16903140	CXCR4
	V179	17094761	KLF9
	V35	16944396	---
	V326	SMC#0236 Cortisol	#N/A
	V83	16839497	---
	V189	16910552	---
	V142	16688949	LINC01461
	V167	16857736	MCEMP1

## Sheet: S file 1g - Hypernetworks
Supplementary file 1g. Analysis of all omic sets at 7 AM (morning of the second intervention day) treated with hydrocortisone and saline (control). Paired t-tests performed to refine elements for hypernetwork analysis. FDR corrected analyses performed using R package limma for transcriptomes; performed using the MetaboanalystR package for metabolomes.
PBMC transcriptome						Adipose tissue transcriptome						GCMS					LCMS					miRNA
id	Gene Symbol	p-value	Fold change	FDR		id	Gene Symbol	p-value	Fold change	FDR		Compound	P-value	Fold change	FDR		Compound name \ sample name	P-value	Fold change	FDR		Assay	Average dcq morning_day2_treatment_P	Fold change morning_day2_treatment_C / morning_day2_treatment_P	t-test P-value	Wilcoxon test P-value
16821541	CRISPLD2	2.04266e-07	2.07283	6.32247e-06		16731441	ZBTB16	3.99403e-08	5.47512	2.11428e-07		m TRYPTOPHANNNO-TMS 1 Mz405	1.25354e-05	0.689966	0.00017304		SMC#0236 Cortisol	3.81122e-08	751.877	5.4982e-07		hsa-miR-425-3p	-2.25072	1.4637	0.0062588	0.00413518
16669796	TXNIP	2.68442e-07	1.41683	0.000173758		16840846	PER1	8.44291e-08	2.83567	7.09984e-07		m DOCOSAHEXAENOIC ACID-TMS 1	0.000173569	1.3806	0.51055		SMC#0134 L-Tryptophan	1.08897e-05	0.788408	0.034987		hsa-miR-186-5p	-4.65941	2.17376	0.00435443	0.00519604
17113147	TSC22D3	3.53676e-07	1.85708	1.02119e-05		17068093	TACC1	8.56799e-07	1.62841	3.41166e-05		RI 2184 Mz 192 1 Kynurenine tri-TMS	0.00060824	0.757977	0.0026694		SMC#0134 L-Tryptophan	5.09977e-05	0.820182	0.053403		hsa-miR-15b-5p	-0.0816317	1.63566	0.0161378	0.0114962
16757160	ALDH2	1.46673e-06	1.42654	0.000237214		16950825	TIMP4	8.59921e-07	2.08102	2.10848e-05		m OCTADECADIENOIC ACID 912-ZZ-TMS 1	0.00479929	1.40523	0.28302		SMC#0131 L-Kynurenine	0.000128783	0.711665	0.020517		hsa-miR-550a-5p	-8.63249	4.37977	0.000594877	0.015873
16763410	NELL2	1.77678e-06	0.724611	0.000426397		17085449	---	2.05928e-06	2.08866	2.33794e-05		m TYROSINENOO-TMS 1 Mz383	0.00682481	0.772565	0.002639		SMC#0135 DL-Tyrosine	0.000244291	0.802843	0.033722		hsa-miR-95-3p	-5.20511	-4.9484	0.00692379	0.015873
17061210	DPY19L2P2	1.98972e-06	0.792845	0.00107976		16664359	CYP4B1	2.59024e-06	2.13903	2.33794e-05		m HEPTADECANOIC ACID-TMS 1 Mz327	0.0103006	1.27445	0.67596		SMC#0135 DL-Tyrosine	0.000292134	0.760037	0.033722		hsa-miR-16-1-3p	-5.56141	2.6278	0.0359449	0.0172119
16762126	LDHB	2.05432e-06	0.827036	0.00235461		16669796	TXNIP	2.80466e-06	2.10458	2.33794e-05		m URACIL-2TMS 1 Mz257	0.0186413	1.13915	0.67596		SMC#0041 Linoleic acid (18:2)	0.00413283	1.62317	0.033722		hsa-miR-576-5p	-5.24326	1.93376	0.0216297	0.0232306
17021478	AKIRIN2	3.15989e-06	1.18534	0.00325523		17125130	---	2.92399e-06	2.29026	2.33794e-05		m CITRIC ACID-4TMS 1 Mz466	0.0193766	1.26833	0.67596		SMC#0040 α-Linolenic Acid (18:3)	0.00645214	1.48394	0.03385		hsa-miR-122-5p	0.4428	-3.21425	0.0319423	0.0432571
16705961	DDIT4	3.31961e-06	2.95297	2.53351e-05		17068134	---	4.34487e-06	2.57068	2.33794e-05		m CHOLESTEROL-TMS 1 Mz458	0.0221521	1.08335	0.28302		SMC#0137 Phenylalanine	0.0115645	1.05396	0.12154		hsa-miR-200a-3p	-6.51141	-2.14249	0.0261547	0.0464007
16889807	CD28	4.60725e-06	0.726287	0.000457014		16879094	VIT	7.64026e-06	2.0792	5.8639e-05		m LACTIC ACID OO-TMS_1 1 Mz191	0.0231666	1.13284	0.67596		SMC#0051 cis-9-palmitoleic acid (16:1)	0.0127744	1.48594	0.020517
16923179	UBASH3A	6.71063e-06	0.757905	0.000768367		17019749	ADGRF5	1.114e-05	1.55792	0.00034173		m HEXADECANOIC ACID-TMS 1	0.0241621	1.26244	0.71477		SMC#0596 Decanoyl-L-carnitine (C10)	0.0129532	1.64107	0.033722
16775386	LOC105370259	1.07904e-05	0.603619	0.000237214		17117533	ZBTB16	1.12626e-05	3.13242	4.2558e-05		m OCTADECENOIC ACID-9-Z-TMS 1 Mz340	0.0250655	1.54595	0.342		SMC#0137 Phenylalanine	0.0158471	1.20266	0.59992
16782026	TRAJ49 /// TRAV20	1.09827e-05	0.71354	0.000487604		16863423	HIF3A	1.17273e-05	1.92843	8.95022e-05		m ARABITOL-5TMS 2 Mz308	0.0256678	0.885088	0.026978		SMC#0595 L-Octanoylcarnitine (C8)	0.0186373	1.58103	0.034987
16663033	SMAP2	1.10293e-05	1.43521	0.000457014		16906749	HECW2	1.33965e-05	2.10786	8.95022e-05		m EICOSATETRAENOIC ACID 581114-ZZZZ-TMS 1 Mz91	0.0283523	1.13525	0.67596		SMC#0050 Palmitic acid (16:0)	0.0193578	1.3111	0.05733
16760928	CLEC4E	1.27977e-05	1.91853	0.000196508		17068136	---	1.4445e-05	2.70592	8.12034e-05		RI 1862 Mz 155 1 Mz186	0.0307584	1.1554	0.67596		SMC#0498 Norepinephrine (noradrenaline) {expRT}	0.0198138	0.446701	0.033722
16976211	IGFBP7	1.55307e-05	1.2355	0.00221754		16891575	ACSL3	2.51613e-05	0.762337	0.00260711		m GLUTAMINENNNO-TMS_3 1 Mz346	0.0325982	1.16074	0.77489		SMC#0031 Oleic acid (18:1)	0.0225732	1.34406	0.05733
16836311	NOG	1.71507e-05	0.633444	0.000349605		16815128	TBC1D24	2.8136e-05	0.711828	0.00124502		m MALIC ACID-3TMS 1 Mz335	0.032781	1.29532	0.67596		SMC#0600 Palmitoyl-L-carnitine (C16)	0.0396795	1.17002	0.21695
16984287	PTGER4	1.80214e-05	1.25033	0.00179413		16703251	KIAA1217	2.82297e-05	1.25261	0.00402885		m 2-OXOISOCAPROIC ACID-MEOX TMS 1 Mz216	0.0397209	1.20949	0.98359
16989202	TCF7	1.81851e-05	0.736034	0.000768367		16681142	TNFRSF25	2.99981e-05	0.691782	0.000982506		m 2-AMINOBUTYRIC ACID ON-TMS 2 Mz232	0.042944	1.35226	0.67596
17106067	VSIG1	2.02784e-05	0.734675	0.000797312		16996882	---	3.1421e-05	1.15642	0.0156688		m ASPARAGINENNO-TMS 1 Mz348	0.0443505	1.20026	0.95204
16762992	LOC105369724	2.30272e-05	1.33393	0.00107976		16935593	TCF20	3.69486e-05	1.17537	0.0125531		m GLUTAMINENNO-TMS_1 1 Mz348	0.0461343	1.21746	0.95204
16666357	AK5	2.61812e-05	0.733171	0.000784156		16993574	BTNL9	4.89819e-05	1.76018	0.000468667
16763608	PCED1B-AS1	2.78454e-05	0.784046	0.00158258		16894001	RNASEH1	5.65001e-05	0.860543	0.0158443
17018497	FKBP5	3.04168e-05	1.54512	0.000487604		17069338	CLVS1	5.93189e-05	0.633225	0.000916954
16864129	FLT3LG	3.3981e-05	0.713529	0.000797312		16690925	LOC105378909	6.07188e-05	2.49424	0.000342305
17101292	STS	3.63918e-05	1.30608	0.00139133		16738400	APLNR	6.0909e-05	0.540104	0.000480262
16853631	EPB41L3	4.05931e-05	1.37902	0.000924072		16666326	ST6GALNAC3	6.2024e-05	1.63087	0.000508916
16937351	ARPC4 /// ARPC4-TTLL3 /// TTLL3	4.0606e-05	1.06461	0.0479237		16741725	PDE2A	8.03928e-05	1.39207	0.00183923
17056227	JAZF1	4.11865e-05	1.42756	0.000768367		17094761	KLF9	8.09537e-05	1.95144	0.000508916
17123436	---	4.32409e-05	0.850569	0.00535883		16937725	SYN2	8.15077e-05	2.34377	0.000431159
16860087	ZNF101	4.40158e-05	0.768976	0.00137523		16703581	LINC01517	8.30133e-05	1.15667	0.0170469
16880122	SPTBN1	5.13418e-05	0.795316	0.00235461		16756649	ACACB	9.22585e-05	1.54829	0.00122526
16903140	CXCR4	5.34942e-05	1.70829	0.000487604		17059828	TFPI2	9.89045e-05	0.431637	0.000508916
16858970	ADGRE5	5.66064e-05	1.23418	0.00279385		16664388	CYP4X1	0.000107365	1.61744	0.000916954
16944396	---	5.78894e-05	0.854173	0.00654845		16968098	CXCL13	0.0001176	1.13635	0.020986
17106493	IL13RA1	5.9333e-05	1.81445	0.000487604		17094453	LOC100133920 /// LOC101928195 /// LOC102724580 /// LOC102724904 /// LOC286297	0.000119963	1.76707	0.000982506
16777685	FLT3	6.04791e-05	2.04195	0.000457014		17067566	RBPMS	0.000136658	1.45757	0.00230317
16725432	CD6	6.31769e-05	0.844986	0.00431857		16947715	SERPINI1	0.000141349	0.429884	0.000864715
16744939	TMPRSS4-AS1	7.0217e-05	1.21503	0.00357285		16985597	---	0.000141592	1.17686	0.0130371
17005197	RNF144B	7.4713e-05	1.55326	0.000768367		16672505	ATP1A2	0.000147301	2.34876	0.000727153
16709739	EMX2	7.61947e-05	0.875782	0.0102839		16998823	NREP	0.000159828	0.736874	0.00357749
16818842	CYLD	7.97658e-05	0.846484	0.00529693		16778652	TSC22D1	0.000167892	1.17012	0.014861
17011279	PRDM1	8.53658e-05	1.44514	0.00100869		16967957	LOC101928809	0.000168486	1.11838	0.02671
16782018	TRAJ54	9.08937e-05	0.732646	0.00137523		16702175	PFKFB3	0.000171094	1.94321	0.000982506
16782066	TRAC /// TRAJ29 /// TRDV2	9.10864e-05	0.605561	0.000768367		16721519	OR2AG1	0.00017842	0.835065	0.0120708
16781901	TRAV16	9.31368e-05	0.63066	0.000768367		16869065	---	0.00017986	1.1429	0.0202836
16882834	MAL	9.42716e-05	0.638209	0.000768367		17125250	---	0.000181447	1.95771	0.00108551
16782090	TRAJ17	9.60861e-05	0.693046	0.00107976		17059955	PDK4	0.000181616	1.99124	0.000916954
16999421	MARCH3	9.81975e-05	0.714811	0.0011946		16671671	TRIM46	0.000183255	1.09933	0.0307437
16782122	TRAC /// TRAJ17 /// TRAV20 /// TRDV2	0.000106866	0.808757	0.00305749		16715103	TYSND1	0.000186286	0.794401	0.00760457
17052625	TRBV24-1	0.000108287	0.56423	0.000752009		16851067	CIDEA	0.000190682	1.52683	0.00194535
16782038	TRAJ43	0.000110088	0.695639	0.0011946		16818165	BCKDK	0.000196296	0.8129	0.0111115
16651007	---	0.000114672	1.3864	0.00137523		16991208	GPX3	0.00020317	2.53555	0.000982506
16975157	RELL1	0.0001152	1.30481	0.00222476		17083433	IL33	0.000226579	0.694651	0.00314851
16718622	ABLIM1	0.000120413	0.810134	0.00324712		16808710	---	0.000245782	1.08374	0.0381568
16752244	DGKA	0.000122081	0.842861	0.00507422		16770848	NOS1	0.000247027	0.845303	0.0142536
16991125	NDST1	0.000126704	1.20593	0.00418601		16785147	---	0.000250851	1.21256	0.0114859
16813825	LINS1	0.000132407	0.822957	0.00390632		16859711	MAST3	0.000254917	0.699909	0.00314851
17120908	---	0.00013241	0.886061	0.0139011		17123028	---	0.000267023	1.21003	0.0108279
16980031	MAML3	0.000136831	1.29008	0.00244015		16850676	LOC105372013	0.00028201	1.18435	0.0138321
16827280	MIR328	0.000142686	1.39454	0.00137523		16997393	ZBED3	0.000284038	1.29414	0.00563669
17119050	---	0.000142686	1.39454	0.00137523		16658536	PER3	0.000306586	0.606895	0.00240794
16782116	TRAC /// TRAJ3	0.000148325	0.775441	0.0024255		16655801	---	0.000314771	0.715037	0.003984
16793532	RTN1	0.000151626	1.3056	0.00227367		17066299	LOC105379311	0.000321355	1.18883	0.0136365
16901161	TBC1D8	0.000151927	1.37149	0.00154238		17094240	LOC101928195	0.000322406	1.48369	0.00314851
16901568	EDAR	0.000156157	0.742473	0.00158258		16683960	MAP3K6	0.000328214	1.47367	0.00378281
16961250	WDR49	0.000161809	1.51555	0.00107976		16856133	PQLC1	0.000330154	1.32369	0.00563669
17052685	TRBC2 /// TRBV3-1 /// TRBV6-5 /// TRBV7-2	0.000162138	0.839214	0.00463845		17097914	PHF19	0.000335397	0.853001	0.0176705
16782044	TRAC /// TRAJ40 /// TRAV20	0.000163626	0.657097	0.0011946		16880293	---	0.000338326	1.15016	0.0198546
17052252	TBXAS1	0.000164652	1.34088	0.00222079		16845249	RAMP2-AS1	0.000354657	1.54095	0.00314851
16747236	LTBR	0.000166589	1.21606	0.00418601		17075060	MIR548V	0.00036155	2.03585	0.00183923
16781961	TRAV26-2	0.000167838	0.594343	0.00103046		16968213	ANXA3	0.000364036	1.55534	0.00314851
16788194	LOC105370652	0.000170295	0.694344	0.00137523		16995500	LIFR	0.000378167	1.82526	0.00218278
17017224	LTB	0.000170363	0.632352	0.00107976		16729290	TSKU	0.000381774	1.67059	0.00305146
16843049	SSH2	0.000175136	1.12387	0.0155006		17125112	---	0.000383528	1.5375	0.00355576
16699643	SUSD4	0.00017616	0.68361	0.00137523		16771310	---	0.000383771	0.790381	0.00917795
16957312	GCSAM	0.000178533	0.720881	0.00158258		16883921	C2orf40	0.000390482	0.800154	0.00917795
17115677	GAB3	0.000180745	1.24418	0.00363836		17094876	ZFAND5	0.000393588	1.36632	0.00567155
16782058	TRAJ33 /// YME1L1	0.000182066	0.756779	0.00226084		16919265	ZHX3	0.00041156	1.45683	0.00357749
17011593	FIG4	0.000182273	1.17662	0.00654845		16819539	ADGRG1	0.000424494	1.53092	0.00357749
16850923	RAB31	0.000182879	1.18959	0.00518009		17092003	VLDLR-AS1	0.000431336	0.625525	0.00328759
16703036	PLXDC2	0.000183035	1.31668	0.00253024		16939439	MYRIP	0.000436488	1.37737	0.00579625
16839497	---	0.000187438	0.846876	0.00663424		17076861	CEBPD	0.000442892	1.42385	0.00402885
16756228	C12orf45	0.000188401	0.841933	0.00526633		16814738	TMEM204	0.000447325	1.38873	0.00397132
17118988	---	0.000192816	1.19711	0.00494707		16880001	GTF2A1L /// STON1 /// STON1-GTF2A1L	0.000461543	1.50988	0.00357749
16769777	CORO1C	0.000193922	1.1797	0.00681301		17068613	---	0.000462416	0.675946	0.00355576
16782062	TRAJ31	0.00019964	0.746182	0.00226084		17014625	RPS6KA2-AS1	0.000463336	0.799456	0.0104561
16738819	MS4A6A	0.000200248	1.2715	0.00324712		16781414	BMS1P17 /// BMS1P18	0.000498131	1.16443	0.0176705
16967863	AREG	0.000214287	1.86604	0.00116543		16681304	ERRFI1	0.000506758	2.10779	0.00314851
17014208	SYTL3	0.000214761	1.2565	0.00332492		17120192	---	0.000508696	1.14338	0.0222149
16871117	---	0.00021552	0.861785	0.00908073		16763666	RAPGEF3	0.000510026	1.55096	0.00357749
16782114	TRAJ4	0.000216098	0.751673	0.00226084		16877555	RHOB	0.00051049	1.50847	0.00357749
16762921	FAM60A	0.000217374	0.892416	0.0155237		16794257	---	0.000530602	0.88867	0.0284743
16761370	KLRC1	0.000224618	1.35218	0.00222729		17012447	LAMA2	0.000537115	2.03989	0.00314851
16781954	TRAV29DV5	0.000230173	0.665633	0.00134949		16710228	PSTK	0.000541295	1.17404	0.0170469
16791444	GZMB	0.00023098	1.42854	0.00168791		16844555	KRTAP3-1	0.000545249	1.10764	0.029624
16670114	BCL9	0.000232371	0.763476	0.0024255		16697281	LINC01350	0.00054859	1.19934	0.0136559
16926260	AATBC	0.000234175	1.25512	0.00332492		17071542	ODF1	0.00057559	1.12963	0.0247305
16969612	LEF1-AS1	0.000234246	0.7083	0.00189033		16675398	CFH	0.000577352	1.38041	0.00540474
16782080	TRAJ22	0.000235032	0.750378	0.0024255		17051575	---	0.000581706	1.15752	0.0196957
16651795	---	0.000236665	1.52414	0.00137523		17022388	CD164	0.000590158	0.791955	0.0112031
16781986	TRAV41	0.000240604	0.63905	0.00137523		17027575	---	0.000592641	1.16297	0.0182797
16984562	PARP8	0.000247467	1.15293	0.00921138		16935427	TOB2	0.000610462	1.36907	0.00563669
16782020	TRAJ53	0.00025848	0.584465	0.00128172		16712503	---	0.000620118	1.15626	0.0202902
16782082	TRAJ21	0.000262856	0.722009	0.00226084		16944798	KALRN	0.000621407	1.38212	0.00563669
16782102	TRAC /// TRAJ10	0.000264673	0.755387	0.0025989		16731605	SIDT2	0.00063428	1.33223	0.00563669
16993421	---	0.000266001	1.12949	0.013506		16768936	TMPO-AS1	0.000647639	0.883591	0.0274041
16912376	LOC105372589	0.000266461	0.620785	0.00137523		16731461	NNMT	0.000651105	1.58837	0.00357749
16911040	CDC25B	0.000266528	0.832654	0.00475873		16717625	MRPL43	0.000663014	0.806994	0.0115091
16768438	BTG1 /// LINC01619	0.000266975	1.28026	0.00324712		16677723	HLX	0.000666814	0.799567	0.0111115
16830041	ZFP3	0.000267556	0.820862	0.00435156		16666755	CLCA2	0.000673205	0.75726	0.00760457
16750416	PCED1B	0.000269716	0.679186	0.00154238		17075014	MTUS1	0.000677107	1.18818	0.0163116
16971019	GAB1	0.00027183	1.25936	0.00338341		16986450	AGGF1	0.000677477	0.870418	0.022643
16765657	TESPA1	0.000274026	0.823762	0.00463845		16942270	PTPRG	0.000687795	1.4169	0.00567155
16853120	TSHZ1	0.000274394	0.925525	0.0310762		16805804	FAM138E	0.000688174	1.21377	0.013318
16691436	LOC101929099	0.000274459	1.21673	0.00477672		16991192	GPX3	0.000705665	1.60385	0.00357749
16805495	IGF1R	0.000282157	0.823667	0.00466792		16884369	LOC105373559	0.00070991	1.1408	0.0233716
16685099	KIAA0319L	0.000282791	1.08427	0.0286592		16853611	---	0.000713197	1.17519	0.0176705
16782070	TRAJ27	0.000285649	0.779987	0.00324712		16977362	---	0.000720179	1.07824	0.0470152
16749583	FAR2	0.000289756	1.33121	0.0025989		16980727	---	0.000727264	0.714893	0.00575793
16692566	RNVU1-17	0.000305747	0.905257	0.0221124		17078452	HEY1	0.000728765	1.67474	0.00357749
16761726	PLBD1	0.000309479	1.26423	0.00403087		16942616	LOC105377153	0.000737166	1.0994	0.0319861
16887702	ITGA6	0.000311182	0.822431	0.00482039		16733377	FLI1	0.000747958	0.854653	0.0196957
16731441	ZBTB16	0.000311277	1.60445	0.00149376		16978236	ADH1B	0.000779937	2.07847	0.00357749
16840113	CXCL16	0.000315992	1.41092	0.00222729		16702283	LOC105376391	0.000788849	1.09639	0.0327588
16761316	LOC105369656	0.000319094	1.38679	0.00227367		16938133	GALNT15	0.000788913	1.83087	0.00402885
16785086	SNAPC1	0.000325533	0.872437	0.00989111		16699371	LOC102723886	0.000802667	0.666862	0.00540474
16967614	DCK /// MOB1B	0.000327313	0.880144	0.0122434		16826460	SALL1	0.000810153	1.08848	0.0365208
17045269	EPDR1 /// NME8	0.000331343	1.27535	0.00365771		16787451	LINC00642	0.000817002	1.11206	0.029358
17024335	HIVEP2	0.000331517	0.786369	0.00340561		16994597	FAM134B	0.000824947	1.39755	0.00653822
16717005	PIK3AP1	0.000335578	1.19737	0.00608845		17028297	---	0.000849894	0.834064	0.0151341
17020231	---	0.000339557	0.883199	0.0145179		17013771	---	0.000860688	1.18624	0.0171945
16724744	OR5L1	0.000345677	0.857204	0.00961538		16697668	---	0.000869995	1.21823	0.013318
16808109	TP53BP1	0.000353592	0.876039	0.0118994		16778392	FOXO1	0.000896909	1.28166	0.0115091
16753751	DYRK2	0.000362773	0.836066	0.00642947		16976029	KDR	0.000912634	0.753192	0.00983125
17056248	CPVL	0.000365848	1.27653	0.003763		16889268	AOX1	0.000921479	1.74219	0.00505371
17106200	MIR3978	0.0003665	1.42062	0.00226084		16986473	ZBED3-AS1	0.00092252	1.61332	0.00483645
16672669	LY9	0.000367398	0.826565	0.00494707		16774303	RGCC	0.000937048	0.715409	0.00756167
17081373	SLA	0.000369935	1.24674	0.00418601		16742812	---	0.000950445	0.634231	0.00563669
17110670	PIM2	0.000379088	0.707107	0.00226084		16982183	SORBS2	0.000967909	1.30476	0.010806
17018995	OARD1	0.000388501	0.847235	0.00554857		16801789	TPM1	0.000976646	1.46687	0.00653822
16688949	LINC01461	0.000390382	1.17529	0.00726667		17070096	MIR2052HG	0.00100504	1.09134	0.0348917
16978834	LEF1	0.00039228	0.795592	0.00391413		17047611	PMS2P9	0.00100825	0.880882	0.0264231
16840846	PER1	0.000396311	1.63833	0.00168791		16751601	TNS2	0.00102103	1.49218	0.00567155
16695974	GPA33	0.00040138	0.823407	0.00500112		17080188	SYBU	0.00102141	1.31383	0.0108987
17085901	ANXA1	0.000402165	1.23496	0.00500112		17022754	LAMA4	0.00103167	0.775775	0.0126205
16883753	---	0.000409072	1.44188	0.00227367		16776709	MCF2L	0.00108187	1.32559	0.0100279
16782022	TRAJ52	0.000419394	0.680458	0.00224279		16882352	ATOH8	0.00110406	1.24751	0.0126645
17025417	AGPAT4	0.000424961	1.23759	0.00431857		16942638	LINC00870	0.00111391	1.12533	0.0280246
16778392	FOXO1	0.000426633	0.891317	0.0167384		17022814	---	0.00111699	0.577039	0.00563669
17126196	---	0.000427386	1.35309	0.00272374		16739784	C11orf95	0.00112279	0.860174	0.0217894
16782034	TRAJ45	0.000433226	0.734833	0.00263415		16925983	C2CD2	0.00112641	1.28594	0.0116496
16958354	---	0.000434164	1.25034	0.00431857		16728439	---	0.00112668	0.775082	0.0108963
16667760	S1PR1	0.00043708	0.734777	0.00262992		16691314	TSPAN2	0.00114253	0.839761	0.0176705
16724633	PTPRJ	0.000438459	1.16195	0.00917246		16667258	FNBP1L	0.00114355	1.46166	0.00683998
17084493	GALT	0.000441916	0.850982	0.00821325		17083295	RCL1	0.00115064	1.2294	0.0149517
16885546	PTPN18	0.000445046	1.24893	0.00418601		17075195	LOC105379309	0.00116216	0.602712	0.00653822
16904278	DPP4	0.00045055	0.817814	0.00494707		16687352	LRP8	0.00117903	0.877749	0.0279587
17074773	DEFB109P1	0.000450852	1.10579	0.0211243		17083197	VLDLR	0.00118142	0.639214	0.00670241
16889160	PLCL1	0.000461324	0.770601	0.00378925		17118287	LOC100128364	0.0011846	1.16	0.020986
16928988	TCN2	0.000464362	1.29803	0.00365771		16805443	---	0.00118901	1.13625	0.024844
16683300	TCEA3	0.000473014	0.789056	0.00390632		16692580	HIST2H2BB /// HIST2H3PS2	0.00121462	0.80092	0.0126645
16753670	IRAK3	0.000479875	1.46295	0.0024255		16933865	SEC14L3	0.00121467	1.12412	0.0285662
16870733	ZNF14	0.000485395	0.829901	0.00616252		16960911	LXN	0.00121921	0.632142	0.00598926
16819181	OGFOD1	0.000492473	0.861792	0.00982614		16772838	ANHX	0.00121963	0.844424	0.0196597
16757831	CCDC64	0.000492548	0.75867	0.00324934		16713562	C10orf10	0.00127568	1.5457	0.00653822
16857736	MCEMP1	0.000495747	1.35211	0.00324712		16876760	---	0.00128977	1.1227	0.0285662
16876810	---	0.000495859	0.842939	0.0079331		16675794	NAV1	0.00129854	0.800016	0.013318
16657383	---	0.000497975	1.46026	0.00228441		17126050	---	0.00129915	0.742977	0.0109699
16782251	C14orf119	0.000498516	0.806064	0.00431857		17126156	---	0.00129915	0.742977	0.0109699
16814528	CHTF18	0.000505692	1.19401	0.00679415		17043529	C1GALT1	0.00130983	0.704797	0.00926667
16782030	TRAJ47	0.000507861	0.71551	0.00263415		16868654	FDX1L /// ZGLP1	0.00132033	0.797408	0.0136559
16775389	LOC101927121	0.000508358	0.663402	0.00227367		17120142	---	0.0013411	1.23726	0.0130597
16779839	KCTD12	0.000509342	1.22773	0.00518009		17120144	---	0.0013411	1.23726	0.0130597
17124842	---	0.000509457	0.820817	0.00511583		16939465	---	0.00135786	1.85872	0.00670241
16854509	DSC1	0.000517608	0.69878	0.00249086		16882793	IGKV1D-43	0.00138047	1.19522	0.0176705
16698697	FCMR	0.000518998	0.752728	0.00324712		16927690	IGLV4-69	0.00138682	1.23662	0.014988
16731795	CD3E	0.000519211	0.802144	0.00431857		16773426	RNU6-78P	0.00140841	0.831536	0.0171945
17094761	KLF9	0.000521506	1.41183	0.00253024		16951452	---	0.00142074	0.779635	0.0120888
17121922	---	0.000523399	0.742336	0.00324712		17066065	SLC7A2	0.00143018	1.32491	0.0111969
16865554	NCR1	0.000533124	1.2209	0.00524812		16863168	RELB	0.00144023	0.762622	0.0115538
16926813	IL17RA	0.000536096	1.14896	0.0112228		16837191	PITPNC1	0.00144227	1.38006	0.00983125
17095043	RFK	0.000539807	0.862449	0.0105468		16978354	EMCN	0.00144865	0.758279	0.011161
16782112	TRAJ5	0.000560345	0.730353	0.00298404		16713262	---	0.00145056	1.34206	0.0111115
16781827	TRAV2	0.000564554	0.688847	0.00248535		16847730	SCN4A	0.00145128	1.31644	0.0108279
17124752	---	0.000564785	1.26201	0.00418601		16769514	APPL2	0.00145859	1.386	0.00976543
16971167	SMAD1	0.000567517	1.1465	0.011487		16906788	---	0.00151876	2.23023	0.00653822
16980470	NR3C2	0.000570555	0.778169	0.00403087		16899048	NAT8B	0.00153869	1.27369	0.0120888
16910552	---	0.00058192	0.637732	0.00227367		16872832	PSG3	0.00155168	1.22256	0.0157124
16849148	RNF157	0.000585136	0.749627	0.00325523		16745767	TMEM218	0.00155712	0.884528	0.0285662
17098698	FAM102A	0.000602951	0.798544	0.00450305		17123808	---	0.00157741	1.19537	0.0179066
16943719	TRAT1	0.000606032	0.81731	0.00500555		16859076	---	0.00160456	0.866367	0.022643
16837326	PRKAR1A	0.00060884	1.11481	0.018556		16911261	BMP2	0.00161681	1.67765	0.00760457
16782050	TRAJ37	0.000618228	0.784995	0.00418601		17085275	AQP7P3 /// AQP7P4	0.00162409	1.56088	0.00917795
17075082	ASAH1	0.000619434	1.19066	0.00784364		16920468	---	0.00165577	0.776512	0.0126645
16781912	OR6C4 /// TRAV19 /// TRAV20	0.000626605	0.773896	0.00390632		16999886	---	0.00165577	0.776512	0.0126645
16971425	---	0.000637411	0.879852	0.0133367		17097560	AKNA	0.00166453	1.32276	0.0115091
16782056	TRAJ34	0.000662827	0.770286	0.00394364		16728991	---	0.00166953	0.805669	0.0126645
17119904	---	0.000665402	0.844596	0.0079331		16977833	SPARCL1	0.00167246	1.3635	0.0108987
16904484	SNORA70F	0.000666529	0.536634	0.00226084		17122218	---	0.0016791	0.7103	0.00917795
17017025	LINC00243	0.000674282	0.867345	0.0112228		17122222	---	0.0016791	0.7103	0.00917795
17034150	---	0.000674282	0.867345	0.0112228		17075973	DUSP4	0.00168769	1.29228	0.0120888
16824555	GDE1	0.000674362	1.09384	0.0263781		16757902	DYNLL1	0.00169412	0.846863	0.0196957
17025177	DYNLT1	0.00068309	1.30565	0.00403087		16991593	---	0.00172978	1.10541	0.0310511
16986777	RASGRF2	0.000683417	0.77389	0.00403087		17001763	TNIP1	0.00175825	1.22593	0.0176705
16985440	MAST4	0.000684545	0.875041	0.0127468		17117581	LOC100128816	0.00176329	1.29019	0.0120888
16747439	GPR162	0.000690993	1.31668	0.00391413		16880236	---	0.00176508	0.663602	0.00917795
16734291	KRTAP5-4	0.000700062	1.3782	0.00325523		16846373	---	0.00179752	1.10845	0.0307437
17035686	---	0.000707799	1.09016	0.0266563		16823825	EMP2	0.0018122	1.20433	0.0182797
17038418	---	0.000707799	1.09016	0.0266563		17087329	TMOD1	0.00181377	1.56787	0.00917795
17040967	---	0.000707799	1.09016	0.0266563		16703289	PRINS	0.00185077	1.22883	0.0176705
17013507	SAMD5	0.000716615	1.27993	0.00431857		16998309	ELL2	0.00186087	1.17708	0.0192083
16807459	RMDN3	0.000719443	1.19712	0.00681301		17012632	ENPP1	0.00187802	1.64065	0.00814995
16844616	KRTAP4-4	0.000721725	1.24837	0.00511583		16819926	CES4A	0.00190604	1.31466	0.0120888
17052683	TRBJ2-7 /// TRBV20OR9-2	0.000724101	0.779248	0.00418601		16751190	METTL7A	0.00191237	1.35379	0.0115959
17119662	---	0.000724101	0.779248	0.00418601		16700888	NID1	0.0019176	1.34657	0.0115091
17122752	---	0.000724974	1.35715	0.00357285		17004657	BMP6	0.00192728	1.51784	0.0108279
16832768	CPD	0.000726121	1.16543	0.0096646		17117798	---	0.00193814	1.24928	0.014988
17052615	TRBV19	0.000743008	0.709447	0.00324712		16769039	GOLGA2P5	0.00200963	1.36697	0.0111115
16871546	TYROBP	0.000743727	1.14464	0.0135466		16929442	TIMP3	0.00200973	1.33313	0.0121521
16763512	SLC38A1	0.000750813	0.91658	0.0272357		17107339	---	0.00201181	1.18429	0.0202902
16815425	ZNF75A	0.000761366	0.874031	0.012993		16995301	RANBP3L	0.00201734	2.18882	0.0076574
16661497	THEMIS2	0.000774251	1.20985	0.00675826		17049149	CNPY4	0.00201998	0.742473	0.0115091
17119702	---	0.000779184	0.809954	0.00518009		17122674	---	0.00202713	1.1238	0.029085
16916439	NSFL1C	0.000781903	1.19403	0.0079331		16669850	ITGA10	0.00202734	1.17053	0.020986
17052671	TRBJ2-1 /// TRBV20OR9-2 /// TRBV25OR9-2 /// TRBV3-1 /// TRBV7-2	0.000783473	0.728034	0.00325523		16760257	VWF	0.00202812	1.24573	0.0151341
16890027	LOC105373850 /// LOC105376761	0.00079269	0.792027	0.00518009		16696979	GLUL	0.0020451	1.57138	0.00917663
17121140	---	0.000802269	1.12476	0.0174619		17124330	---	0.00204885	0.890625	0.0293187
16946841	RNF13	0.000806423	1.14981	0.0115186		16981791	---	0.00207813	0.818197	0.0176705
16665447	USP1	0.00080667	0.919444	0.0287373		16983463	LOC101929544	0.00210115	1.12796	0.0284743
16858386	LDLR	0.000810543	0.845383	0.00821325		16846694	---	0.00211206	1.22515	0.0176705
17027801	---	0.000810791	1.19405	0.00681926		16957884	FSTL1	0.00211918	1.17336	0.0216615
17033344	---	0.000810791	1.19405	0.00681926		16818610	GPT2	0.00217381	1.35919	0.0120708
16760792	CD163	0.00081648	1.56086	0.00285276		16728251	LOC102724265	0.00218196	1.13118	0.0278908
16752703	NAB2	0.000821352	1.21733	0.00663424		17095056	PRUNE2	0.0021884	0.850598	0.0211011
17089735	SPTAN1	0.00082399	0.875877	0.0135501		17048923	CPSF4	0.00220618	1.12762	0.028528
17122096	---	0.000826355	0.841771	0.0079331		17125248	---	0.00221697	1.30121	0.0127689
17071815	---	0.000834004	0.895404	0.0206153		16674106	TNN	0.00221953	1.22283	0.017311
17050350	LRRN3	0.000847252	0.722688	0.00332492		16729846	---	0.00225316	1.16773	0.0221806
16782014	TRAJ57	0.000853925	0.69436	0.00324771		16872352	AKT2	0.0022596	0.852984	0.0233716
16855342	STARD6	0.000857102	0.891977	0.0190513		16680559	LOC105378589	0.00226338	0.899933	0.0312012
16935274	ENTHD1	0.000857401	0.882757	0.0167314		16845510	PYY	0.00227505	0.875046	0.0281778
16781967	TRAV35	0.000861454	0.642123	0.00298404		16786104	DCAF4	0.0022933	1.40554	0.0100279
16660810	RCAN3	0.000863578	0.795291	0.00484881		16859802	SSBP4	0.00230552	1.13236	0.0280246
16851565	TTC39C	0.00086893	0.887482	0.0176965		16678518	DUSP5P1 /// RHOU	0.00230846	1.34795	0.0120888
17101856	NHS	0.000869279	1.13297	0.0157622		16769202	---	0.00230994	1.11836	0.0302658
16860691	KIAA0355	0.000869628	0.915734	0.0267297		16771787	HCAR1	0.00232399	0.873779	0.027
17071651	DCAF13	0.000876212	0.850851	0.0105		16683873	---	0.00232471	1.34354	0.0120888
16945135	---	0.000877117	0.72281	0.0037024		16863091	PVRL2	0.0023304	0.840529	0.0202902
16735732	---	0.000886738	1.46562	0.00325523		16806516	---	0.00240282	0.69893	0.0115091
16792287	FBXO33	0.000887041	1.06437	0.0557012		16990862	ABLIM3	0.00240974	1.46657	0.0115091
16947287	TIPARP	0.000911034	1.20354	0.00759686		16655867	---	0.00241421	0.756279	0.013318
16980974	FAM198B	0.00091155	1.31914	0.00431857		16768723	USP44	0.00242379	1.19859	0.0196317
17067190	DPYSL2	0.000923936	1.19763	0.00759686		16871072	C19orf12	0.00243894	1.36195	0.0120888
16883756	---	0.000945199	1.40239	0.00357628		17043808	LRRC72	0.0024414	1.13571	0.0275838
16925328	KCNE1	0.000948685	1.41155	0.00357628		17063252	---	0.00246588	1.17816	0.020986
17063764	TRBV7-8	0.00095128	0.658465	0.00324712		16707551	CEP55	0.00247261	0.870526	0.0253937
16781877	TRAC /// TRAV8-4	0.000961635	0.728208	0.00376059		16652127	---	0.00249011	1.22962	0.0176705
17119608	---	0.000962589	1.35646	0.00390632		16820891	---	0.00249461	0.841141	0.0200916
16780509	DOCK9	0.000970355	0.819876	0.00681926		16832835	SUZ12P1	0.00249835	1.46992	0.0109788
16968246	BMP2K	0.000977351	1.10257	0.0234496		17018497	FKBP5	0.002519	2.05707	0.00983125
17026272	---	0.000978027	1.20263	0.00759686		17084825	LINC00961	0.0025212	1.31589	0.0136265
17093245	AQP3	0.000984549	0.801027	0.00526633		16914901	---	0.00252732	1.67594	0.00988379
17121884	---	0.000986464	0.859684	0.0113016		16747991	RIMKLB	0.00252782	1.2362	0.0158395
16782028	TRAJ48	0.000987392	0.724404	0.00383596		16851309	GREB1L	0.00254369	1.69586	0.0104561
16743816	PDGFD	0.000989163	1.30224	0.00450305		16864695	IGLON5	0.00255155	1.06884	0.0676395
16748227	KLRF1	0.00100204	1.43742	0.00355225		16921760	LINC00308	0.0025785	1.20037	0.0202124
16960573	P2RY13	0.00100249	1.20528	0.00783804		16968583	AFF1	0.0025804	1.26112	0.0174072
16781920	TRAV21	0.00100327	0.676304	0.00325523		16888674	WDR75	0.00258693	1.16963	0.0229335
17007844	---	0.00100789	0.894543	0.0180601		16771572	---	0.00258857	1.57116	0.0109788
17030627	---	0.00101883	1.17494	0.00904156		16889411	CFLAR	0.00260175	1.19824	0.0202902
17035425	---	0.00101883	1.17494	0.00904156		17121148	---	0.0026024	1.24473	0.0170469
16890837	SLC11A1	0.00102332	1.53719	0.00332492		17117443	---	0.0026071	1.56779	0.0108963
16837587	CD300A	0.00102391	1.18169	0.00899321		16832379	LGALS9	0.00261586	0.830885	0.0194917
16889829	ICOS	0.00102817	0.754736	0.00418601		16747373	COPS7A	0.00262522	0.912951	0.0416651
16657514	LINC01128	0.00103841	0.82624	0.0069349		16834165	KRTAP9-7	0.00263277	1.16291	0.0229335
16935955	NUP50-AS1	0.001041	1.15533	0.0118291		16852218	C18orf25	0.0026335	1.28783	0.0126205
17053401	GIMAP1 /// GIMAP1-GIMAP5 /// GIMAP5	0.00104526	0.850477	0.00955616		16795004	LOC105370574 /// LOC105370577	0.00264095	1.20299	0.0198546
16788339	EVL	0.00104738	0.863246	0.011487		16763032	PKP2	0.00265441	1.39793	0.0111115
16911283	PLCB1	0.00104783	1.56511	0.00324712		16908557	NHEJ1	0.00265508	0.871015	0.0271053
17014364	IGF2R	0.00105279	1.19907	0.00779816		16795057	LOC102724190	0.00265742	1.48477	0.0115091
17026762	---	0.00105594	0.656626	0.00324712		17123814	---	0.00266821	1.11908	0.0301503
17029082	---	0.00105594	0.656626	0.00324712		16662329	GJA4	0.00270993	1.21553	0.0186176
17031867	---	0.00105594	0.656626	0.00324712		16742779	---	0.00273666	0.79711	0.0171945
17034339	---	0.00105594	0.656626	0.00324712		16860414	PLEKHF1	0.00273882	1.74274	0.0108279
17036587	---	0.00105594	0.656626	0.00324712		16707054	LIPJ	0.00275983	1.11101	0.0315543
17039380	---	0.00105594	0.656626	0.00324712		16931333	MIRLET7BHG	0.00278014	0.759057	0.0149332
17041863	---	0.00105594	0.656626	0.00324712		16706757	RGR	0.00278727	1.21233	0.0190675
16782092	TRAJ16	0.00107688	0.736641	0.00418601		16971588	KIAA0922	0.00280512	0.825448	0.0196957
16877451	---	0.00109044	1.2968	0.00500112		16839769	P2RX5 /// P2RX5-TAX1BP3 /// TAX1BP3	0.0028104	0.912047	0.0407266
17039907	---	0.00109081	1.07657	0.0426892		17072727	MIR1207	0.00281317	1.2132	0.0202902
16782060	TRAJ32	0.00109868	0.785788	0.00518009		17004431	C6orf201	0.00281768	1.12338	0.0293948
17052595	TRBV4-1	0.00109985	0.642663	0.00324712		17096713	OR13C4	0.00282031	0.802326	0.0176705
17120318	---	0.00111253	1.11478	0.019639		16678925	LOC101927787 /// LOC105373209 /// LOC148638	0.00284034	1.08787	0.0393822
16887736	PDK1	0.00111815	0.813523	0.00681301		16824712	DNAH3	0.00284054	1.10071	0.033361
16728652	INPPL1	0.00112119	1.08618	0.0301092		17046524	---	0.00285473	1.15178	0.0261168
16877679	---	0.00112668	1.2382	0.00681926		16819747	---	0.00285836	0.836548	0.0202902
16840262	NUP88	0.0011272	0.884105	0.0170222		16761259	CLEC1A	0.00286394	1.34353	0.0142536
17057525	TNS3	0.00113619	1.26685	0.00529322		16953568	UQCRC1	0.00286935	0.862783	0.027
16782098	TRAJ12	0.00114354	0.753279	0.00431857		16883205	COX5B	0.00287442	0.848179	0.0240429
16807195	RASGRP1	0.00114458	0.834239	0.00821325		17023046	---	0.00288319	1.13113	0.0282517
16915220	RAB22A	0.00114581	0.91834	0.0279063		16827248	TRADD	0.00288412	0.804687	0.0177883
16840579	GABARAP	0.00114808	1.07616	0.0396394		17072014	---	0.00289605	1.18164	0.0210514
16894782	NT5C1B /// NT5C1B-RDH14 /// RDH14	0.00115199	0.857297	0.0111119		16921769	---	0.0029122	1.14788	0.0259238
16780917	IRS2	0.00115551	1.41396	0.00391856		17123530	---	0.00296235	1.11528	0.0306228
17105082	GPR174	0.00115577	0.818936	0.00681926		16670169	LOC105371227	0.00299447	1.20929	0.0200657
16778887	KIAA0226L	0.00116469	0.743503	0.00423801		16669364	HSD3B2	0.00299478	1.36947	0.0126645
17049714	LOC101927746	0.00116896	1.14293	0.0156219		16716234	---	0.00300386	0.799345	0.0176705
16798238	IPW /// SNRPN	0.00117091	0.849541	0.00989111		16670479	CIART	0.0030071	0.800859	0.0171945
17038124	---	0.00117241	1.17816	0.00892958		16692553	---	0.00302515	0.762907	0.0142536
16847933	AXIN2	0.0011794	0.806195	0.00642947		16982806	LOC105374621	0.00302733	1.14038	0.0281778
16750431	---	0.00118069	0.64403	0.00340286		16929488	LL22NC03-86D4.1	0.00304439	1.26939	0.0157743
17005296	LOC105374971	0.00118475	1.17463	0.00998162		16730754	LOC101928535	0.00305418	1.09341	0.0378488
17003858	RNF130	0.00119629	1.17203	0.010949		16937137	LMCD1	0.00305475	1.49744	0.0120888
16782104	TRAJ9	0.00121093	0.719456	0.00403087		16900531	---	0.00306864	0.357473	0.0106426
16768721	---	0.00121352	0.830464	0.00851613		17014309	ACAT2	0.00307211	0.853013	0.025346
16782052	TRAJ36	0.00121812	0.760911	0.00494707		17122500	---	0.00309829	0.77964	0.0157124
17019348	CRIP3 /// ZNF318	0.0012198	1.18524	0.00921138		17125368	---	0.0030989	0.920328	0.0437636
16951247	ANKRD28	0.00122487	1.09126	0.027556		16864234	BCL2L12	0.00312921	0.857531	0.0260331
17067284	EPHX2	0.00123608	0.723545	0.00403087		17100420	NRARP	0.00315172	0.746539	0.014988
16816418	ITPRIPL2	0.00123976	1.21977	0.00696794		16848219	ABCA6	0.00320953	1.35192	0.0142536
17087191	HABP4	0.00126196	0.797715	0.00642947		17112596	PCDH19	0.00321661	1.3409	0.0142536
16971488	LOC100996286	0.00126324	0.767119	0.00479636		17121878	---	0.00321707	1.49757	0.0124862
17108779	ARSD	0.0012652	1.22944	0.00679415		16836650	LOC101927755	0.00325805	0.845057	0.0222149
16880648	LOC100507006	0.00128831	1.19609	0.00906544		16863747	EMP3	0.00331751	0.814445	0.0196317
16782064	TRAJ30	0.00129012	0.76641	0.00500112		16653073	---	0.00332598	1.55953	0.0116496
16946464	ATP1B3	0.00129835	1.20451	0.00821325		16800322	ELL3 /// HYPK /// SERF2	0.00333931	0.933014	0.0700498
16849652	TBC1D16	0.00130022	1.17925	0.00948933		16675197	PLA2G4A	0.00334372	0.699885	0.0129699
16776411	LINC00399	0.00130377	1.13157	0.0171987		16770454	---	0.00334759	2.07396	0.0114859
16781916	TRAV20	0.00131066	0.749552	0.00463845		17007237	RNF5	0.00336748	0.840803	0.0229335
16782046	TRAJ39	0.00131274	0.715516	0.00418601		17026393	---	0.00336748	0.840803	0.0229335
16819325	HERPUD1	0.00131694	1.12353	0.0179626		17033588	---	0.00336748	0.840803	0.0229335
16781950	TRAV27	0.00131835	0.687263	0.00403087		17035866	---	0.00336748	0.840803	0.0229335
17092740	---	0.0013244	0.922671	0.0298108		17038580	---	0.00336748	0.840803	0.0229335
16719217	CHST15	0.0013254	1.33698	0.00463845		17071251	---	0.0033784	1.12784	0.0299014
16723318	PRRG4	0.00132564	1.29499	0.00518009		16676150	BTG2	0.00338182	1.23414	0.0176705
16672478	SLAMF8	0.00132838	1.21264	0.00861358		16718622	ABLIM1	0.00338377	1.32127	0.0156698
17060317	CYP3A7 /// CYP3A7-CYP3A51P	0.00132859	0.60727	0.00344644		16689869	F3	0.00340106	1.82556	0.012139
16854904	PSTPIP2	0.00133067	1.22585	0.00681926		16843541	CCL16	0.00340858	1.47442	0.0120888
17052611	TRBV4-2 /// TRBV4-3	0.00133536	0.651278	0.00368459		16713454	RASGEF1A	0.00341911	0.873204	0.0284743
16910341	PASK	0.00133972	0.812935	0.0072932		17048676	DLX6	0.00342026	1.24157	0.0190675
16777167	ZMYM5	0.00134563	0.883465	0.0168364		17067451	LOC105379347	0.00342573	0.824082	0.0202902
16682016	AGMAT	0.00134657	0.746125	0.00463845		16793423	C14orf37	0.00343491	1.27737	0.0169956
17040719	---	0.00135472	1.20855	0.00719455		16797235	---	0.00343779	0.82208	0.0202902
17030923	---	0.00135884	1.08491	0.029978		17056098	HOXA1	0.00345161	0.865953	0.0265602
16871290	LOC102723540	0.00136103	0.746602	0.00465678		17117577	LOC100128002 /// LOC100996701	0.00349367	0.891212	0.0318519
17121300	---	0.00137406	1.19811	0.00853639		17020942	FILIP1	0.00350119	1.20381	0.0202902
16722960	---	0.00138613	1.41037	0.00418601		16675218	LINC01036	0.00351429	1.24761	0.0176705
16986351	IQGAP2	0.00139702	1.19481	0.00921138		16955167	ESRG	0.0035204	1.23969	0.0176705
17080450	EXT1	0.0014176	1.15731	0.0129173		17021544	---	0.00354391	0.871293	0.0277064
16761631	DUSP16	0.00142941	0.859968	0.0117136		16678191	ADCK3	0.00355198	1.31639	0.0154305
16731654	TAGLN	0.0014295	1.27968	0.00540521		16809403	MYO5C	0.00355726	1.51749	0.0127318
16690343	VAV3	0.00143933	1.20881	0.00821325		16810585	PIF1	0.00355939	0.85953	0.0253238
16935727	PACSIN2	0.00144234	1.07511	0.0396967		16915182	PCK1	0.00356806	1.37595	0.014988
16894359	---	0.00144943	1.45289	0.00418601		16986501	PDE8B	0.00358074	1.88322	0.0115538
17000129	H2AFY	0.00145616	1.1728	0.0112639		17015652	NEDD9	0.00358361	1.15646	0.0229335
16702229	PRKCQ-AS1	0.00146548	0.759512	0.00527332		17118190	NEDD9	0.00358361	1.15646	0.0229335
17052673	TRBJ2-2	0.00147819	0.700467	0.00416881		16920190	---	0.00359035	1.14376	0.0275838
16810967	---	0.0014804	0.884064	0.0163104		16995802	PLCXD3	0.0035946	1.28782	0.0174072
16744138	EXPH5	0.00148305	0.75888	0.00535883		16722916	SLC17A6	0.00359962	0.825569	0.0202902
16767633	LOC105369839	0.0014853	0.875594	0.0163357		17026994	---	0.00360009	0.841567	0.0219893
17122196	---	0.00148868	1.35197	0.00463845		17037086	---	0.00360009	0.841567	0.0219893
16748327	KLRD1	0.00149405	1.4948	0.00411312		16651021	---	0.00362479	1.61804	0.0115091
16656779	---	0.00149542	1.41738	0.00431857		16935029	CSNK1E	0.00362796	0.839464	0.0226738
16781830	TRAJ17 /// TRAV3	0.00149549	0.753261	0.00500112		17029594	---	0.00363667	0.843167	0.0217894
16747261	CD27	0.00150547	0.758758	0.00505563		17034585	---	0.00363667	0.843167	0.0217894
17124826	---	0.00150679	1.25411	0.00666712		17039794	---	0.00363667	0.843167	0.0217894
17006666	LST1 /// LST1	0.00150703	1.1905	0.00888195		17042290	---	0.00363667	0.843167	0.0217894
16708269	WNT8B	0.00150894	1.23114	0.00677823		16898286	---	0.00366275	0.715092	0.0149517
16995925	C5orf28	0.00151179	0.816046	0.00739717		17073220	LY6K	0.00368961	1.13777	0.0293187
16915111	---	0.00153131	1.61594	0.00376128		16882645	TEX37	0.00369812	1.22107	0.0190675
16860152	ZNF430	0.00153233	0.680966	0.00431857		16930486	MCHR1	0.00369844	0.885461	0.029624
16665717	LEPR /// LEPROT	0.00154286	1.12233	0.0188025		17051409	AHCYL2	0.00371012	1.26394	0.0174072
16886564	FMNL2	0.00154358	1.50466	0.00410191		16856338	GRIN3B	0.00373984	0.884553	0.030267
16880227	---	0.00155941	0.83152	0.00921138		17021510	CNR1	0.00374777	1.48497	0.0124862
16810473	DAPK2	0.00156102	1.45692	0.00418601		17123032	---	0.00375043	1.37131	0.014988
17063803	TRBV6-5	0.00157162	0.741668	0.00473769		16818927	CHD9	0.00375597	1.11667	0.0307437
16993397	CANX	0.00157277	1.06014	0.0747993		16982251	F11-AS1	0.00375681	0.931566	0.0652476
16781867	TRAV8-3	0.00157527	0.653438	0.00403087		16990848	ADRB2	0.00376871	1.19739	0.0218876
16852619	LOC102724745	0.00157649	0.659475	0.00418601		16985518	PIK3R1	0.00377663	1.5045	0.0127689
16679499	ZBTB18	0.00158653	0.890851	0.0182243		16821794	ZFPM1	0.00377695	1.2904	0.0174072
16903953	ACVR1C	0.00158882	0.835976	0.00886373		16737151	CSTF3	0.00379221	0.840238	0.0226738
16956952	RPL24	0.00160318	0.905174	0.0229991		16873487	MYPOP	0.00380806	0.879942	0.0306018
16767052	GNS	0.00160614	1.1849	0.0106006		16690623	GNAT2	0.0038193	0.780143	0.0186779
16916515	SIRPG	0.00160812	0.69885	0.00423801		17005535	HIST1H4A	0.00384302	1.19262	0.0223589
16690758	---	0.00161464	0.850274	0.0112414		16853012	LOC105372188	0.00385748	1.43259	0.0127689
16787193	---	0.00162275	0.862954	0.0132339		16651269	---	0.00386469	1.4556	0.0126332
16702399	CELF2	0.00162689	1.08643	0.0317755		16705247	NRBF2	0.00386567	0.74855	0.014988
16678346	---	0.00162758	1.18259	0.0105059		16714086	VSTM4	0.00386757	1.38607	0.0149517
16971631	TLR2	0.00163331	1.48986	0.00425904		17083108	DMRT2 /// LINC01230	0.00387124	0.799107	0.0182939
16860946	LSR	0.00163615	0.777851	0.00646235		16735801	EIF4G2	0.00387262	0.901569	0.0371801
16740412	LTBP3	0.00163977	0.92106	0.0320539		17112548	---	0.00387873	1.12333	0.030267
17016612	---	0.00164834	1.25304	0.00781546		17057599	PKD1L1	0.0039357	0.730821	0.0150783
16666416	NEXN	0.00166116	1.23284	0.00790293		16878443	FOSL2	0.00394491	1.24016	0.0192458
16672306	CD1D	0.00167254	1.26485	0.00647683		17018292	UQCC2	0.00394893	0.827121	0.0222149
16731297	NCAM1	0.0016832	1.28907	0.00595808		16802190	MAP2K1	0.00394958	0.818929	0.0206253
16746267	---	0.00168697	1.26061	0.00675826		16961947	---	0.0039632	0.634253	0.0126205
17118864	---	0.00168697	1.26061	0.00675826		16970647	LOC100507487	0.00397729	0.827264	0.0213692
16939815	ABHD5	0.00169754	1.32132	0.00533895		16949839	MUC20	0.00397838	0.77599	0.0182132
16760940	LOC105369644 /// LOC105369646	0.0016979	1.54784	0.00418601		16848262	MIR4524A	0.00398877	1.70877	0.0116428
16763182	ABCD2	0.00170221	0.792656	0.00681301		17083117	DMRT2	0.00404031	0.674603	0.0142341
16781941	TRAV26-1	0.00170786	0.698189	0.00431857		16891555	SGPP2	0.00404846	0.906011	0.0363626
17057718	FIGNL1	0.00171783	0.932997	0.043778		17007701	ANKS1A	0.00407033	1.30709	0.0174072
16799084	PGBD4	0.00171858	0.855747	0.0112639		16934308	LARGE	0.00407215	1.26482	0.018172
16670183	---	0.00172189	0.584312	0.00390632		17059119	SEMA3C	0.00407665	0.749573	0.0176705
16736847	LIN7C	0.00173235	0.895315	0.0212331		16656025	---	0.00407922	1.21958	0.0202902
17123744	---	0.00174086	1.42766	0.00463845		16820398	SLC7A6	0.00408783	1.5101	0.0141364
16896296	NLRC4	0.00174577	1.2905	0.00647683		16767422	PTPRB	0.00408954	1.28146	0.0182797
16768792	HAL	0.00177186	1.36738	0.00494095		16765192	CSAD	0.00411325	1.32896	0.0157124
16826539	AKTIP	0.00178238	0.796278	0.00681926		16765606	GTSF1	0.00411592	1.13084	0.029339
16922275	IFNGR2	0.00178839	1.13586	0.0163357		16735639	TMEM41B	0.00413087	0.826009	0.0200657
16779766	KLF12	0.00179065	0.866444	0.0143713		16725935	POLR2G	0.00414995	0.871027	0.0279587
16731806	CD3G	0.00179584	0.83325	0.00913192		17122506	---	0.00415659	0.836252	0.0222149
16969229	DAPP1	0.00179767	1.12047	0.0197012		16955291	ARHGEF3	0.00416669	0.834509	0.0222149
16730522	BIRC3	0.00179779	0.766534	0.00646235		16772988	---	0.00416908	1.14999	0.0279587
16719653	LOC105378567	0.00182866	0.8355	0.00921138		16688463	LOC105378794	0.00418264	1.15235	0.0264231
16781927	TRAV23DV6	0.00183409	0.655434	0.0043248		16653015	---	0.00418454	0.779067	0.0172437
16920047	PREX1	0.00183957	1.15944	0.01371		17065403	---	0.00418916	0.824345	0.0207368
16839443	---	0.00185503	1.29896	0.00605664		17065413	---	0.00418916	0.824345	0.0207368
16669568	SRGAP2 /// SRGAP2B	0.00186626	1.37311	0.00516637		16995771	C6	0.00419255	1.733	0.0126332
16782040	TRAC /// TRAJ42 /// TRAV20	0.00186917	0.702368	0.00463845		17113147	TSC22D3	0.00420739	1.40342	0.0140149
16669121	ATP1A1	0.00188758	0.896757	0.0209223		17001299	DPYSL3	0.00421808	1.21166	0.0207096
16862118	LGALS17A	0.00189252	0.729965	0.00518009		17052906	OR2A12	0.00422067	1.10808	0.0319769
16902787	TUBA3E	0.00190033	1.20194	0.00921138		16785943	LINC01269	0.00422103	1.1761	0.0251777
16865510	KIR2DL4	0.00190718	1.21401	0.00921138		16962536	MASP1	0.00423097	1.33912	0.0156698
16718666	ABLIM1	0.00191143	1.39779	0.00500112		16993398	---	0.00424376	2.07172	0.0120888
16949365	EIF4A2	0.00191537	0.917866	0.0308517		16901393	FHL2	0.00427864	1.32338	0.014988
16836333	SCPEP1	0.00191557	1.2764	0.00675826		17082782	RECQL4	0.00428255	1.14761	0.0278908
16844155	MED1	0.00193069	0.920407	0.0301688		16813038	MFGE8	0.00429674	1.32913	0.0158914
17104236	ZC3H12B	0.00193144	0.822361	0.00866713		16780453	---	0.00429833	1.11306	0.0311572
17105076	P2RY10	0.00193153	0.786399	0.00663424		16791487	---	0.00430798	1.13301	0.028968
17097653	TNFSF8	0.00193249	1.27978	0.00681301		16757578	---	0.00434397	0.920124	0.0486716
16971413	RPS3A	0.00193844	0.91324	0.0264378		16719838	TUBGCP2	0.00434783	0.828619	0.0211011
16676589	---	0.0019408	1.28624	0.00654845		16742742	MIR708	0.00436766	0.580445	0.0129699
16932077	MIR648	0.00194503	1.31654	0.00606195		17051040	LOC100506664	0.00440131	1.12858	0.0301933
16970167	---	0.00194896	1.25836	0.0069349		16884697	IGKV1OR2-108	0.00443867	1.16713	0.0261845
16996645	DIMT1	0.00195186	0.814062	0.00808007		17041209	---	0.00445697	0.867448	0.0284743
16667000	LRRC8D	0.00195339	1.16269	0.0128597		17065347	---	0.00447065	0.872199	0.0280246
16916976	---	0.00195489	1.12031	0.0209126		17065357	FAM90A15P	0.00447065	0.872199	0.0280246
16743432	SESN3	0.00195825	0.880415	0.0170502		16664576	---	0.00448278	0.795707	0.0196636
16981051	LOC105377515	0.00197416	0.822361	0.00935396		16982464	---	0.00448318	0.836015	0.0222149
16813038	MFGE8	0.00197843	0.791405	0.00681926		16975803	FRYL	0.00448663	0.866931	0.0280246
17063838	TRBV30	0.00198192	0.659657	0.00442715		17121842	---	0.00449271	1.17115	0.0255217
17028157	---	0.00198599	1.1232	0.0192516		16930221	---	0.00449766	0.870128	0.0284743
17035730	---	0.00198599	1.1232	0.0192516		16937855	FBLN2	0.00451491	1.25358	0.0196597
17041011	---	0.00198599	1.1232	0.0192516		16701775	IDI2-AS1	0.00455071	1.09134	0.0385382
16782042	OR6C4 /// TRAJ41	0.00198982	0.772568	0.00654845		16969080	---	0.00455103	0.898481	0.0319769
16915676	RPS21	0.00199792	0.895287	0.0211243		16655071	---	0.00455329	1.39916	0.0150783
16697654	MIR181A1HG	0.00199977	1.46249	0.00507422		16859788	PGPEP1	0.00455551	0.78478	0.0196317
16860229	---	0.00200439	0.875958	0.0163357		16840318	NLRP1	0.00456026	1.20037	0.0222149
17024144	IFNGR1	0.00201014	1.21703	0.00919735		17074567	SOX7	0.0045813	0.770518	0.0176705
16939796	SNRK	0.00201065	0.910712	0.0272357		16880233	---	0.00459642	0.439453	0.0125531
16675301	RGS1	0.0020107	1.49334	0.00463845		17065954	---	0.00459899	1.14644	0.0283864
17001091	---	0.00201197	1.24201	0.00821325		16704875	NCOA4	0.00461209	0.813486	0.0207096
16836609	MIR21 /// VMP1	0.0020274	1.19877	0.00981789		16913303	---	0.00461567	0.518009	0.0127689
16781870	TRAV13-1	0.00204527	0.689118	0.00494095		16861390	---	0.00464544	1.12871	0.0305431
16650081	---	0.00204674	0.61982	0.00431857		17117831	PLA2G4C	0.00465775	0.799544	0.0196597
16991527	CYFIP2	0.00205794	0.899711	0.0201521		16802098	---	0.00467787	1.19372	0.0222304
17111711	VSIG4	0.00205883	1.57394	0.00423801		16761877	EPS8	0.00469057	1.28242	0.0179119
16997199	ENC1	0.00207515	1.22364	0.00821325		16665340	LOC105378760	0.00469742	1.26714	0.0191184
16890490	ATIC	0.00207957	0.880178	0.0172592		16840919	CTC1	0.00469759	1.3469	0.0163654
16938654	---	0.0020907	1.11555	0.021181		17124128	---	0.0046991	1.11314	0.0327588
16723566	LOC105376623	0.00209598	1.1586	0.0143713		17059756	CDK6	0.00470793	0.764533	0.0170469
16811500	NPTN	0.00213046	1.10236	0.024357		17124524	---	0.00470817	0.772839	0.0171945
16788271	CYP46A1	0.00213512	1.12825	0.0192649		16809929	SLTM	0.00470883	0.852789	0.0271053
16705493	KIF1BP	0.00213808	0.836723	0.0107488		16655799	---	0.00471331	0.896595	0.0321037
16964624	LINC01587	0.00214237	1.1751	0.0115186		17097000	PTPN3	0.00477212	0.693929	0.0154772
16865470	KIR2DL1 /// KIR2DL3 /// KIR2DP1	0.00214325	1.2511	0.00759686		16656471	---	0.00478342	1.48984	0.0147197
17069063	LYN	0.00214466	1.1907	0.0109283		16650219	---	0.00479467	1.25816	0.0196317
16929562	HMOX1	0.00215208	1.1777	0.011487		17053892	INSIG1	0.00480068	0.784802	0.0196317
16833426	CCL4L1 /// CCL4L2	0.00216515	1.40709	0.00518009		16834867	HIGD1B	0.00480539	1.40436	0.0150783
16884335	ACOXL /// BCL2L11	0.00216521	1.24975	0.00779816		16868138	NDUFA7	0.00480697	0.848884	0.0254225
16911835	RIN2	0.00216814	1.20998	0.0106578		17004335	---	0.00481924	0.738628	0.0176705
16757178	ALDH2	0.0021688	1.55205	0.00466008		16963024	---	0.0048365	1.20555	0.0212954
16755908	DRAM1	0.00216884	1.16254	0.0132125		17123794	---	0.00485165	0.821584	0.0216329
16841137	GAS7	0.00218875	1.22308	0.00888195		16957356	---	0.00486436	0.509675	0.0129699
17056072	SKAP2	0.00219041	1.18753	0.0116675		17000233	---	0.00488927	1.15796	0.0271053
16782078	TRAJ23	0.00219212	0.771682	0.00681301		16867310	UBXN6	0.00489033	0.920079	0.0506085
17006310	---	0.0022075	0.846289	0.0112742		17122858	---	0.00490484	1.09744	0.037522
17012946	TNFAIP3	0.00221754	1.42678	0.00526633		16798238	IPW /// SNRPN	0.00490665	0.79134	0.0196317
17043856	AHR	0.00222163	1.23935	0.00886373		16938007	FGD5	0.00492579	1.2199	0.0216794
16830883	ALOX15B	0.00222196	1.35321	0.0062556		17043278	---	0.00493749	0.913819	0.0399985
17099031	---	0.00222679	0.875911	0.0178327		16905516	TTC30B	0.00493918	0.742782	0.018172
16746992	CCND2	0.00223052	0.829403	0.00982614		17127393	---	0.00497801	1.13699	0.0292724
17094076	LOC105376039	0.00223585	0.907498	0.0264378		17013002	HEBP2	0.00499032	1.52438	0.0158914
16856031	ZNF516	0.00223771	1.17908	0.0112054		17103804	MAGED1	0.00500738	0.83754	0.023436
16791300	CIDEB	0.00223888	1.14334	0.0161379		16694266	GON4L	0.0050113	0.905948	0.0371801
17070381	LRRCC1	0.00224414	1.1875	0.011794		16951150	SH3BP5	0.00501584	0.808108	0.0206677
16760148	FGF23	0.00225314	1.14396	0.0166055		17016764	HCG4B	0.0050385	1.1567	0.0275838
16878522	PPP1CB /// SPDYA	0.0022608	1.12588	0.0199839		16857934	---	0.00504784	0.745598	0.0177883
16702245	LOC101928150	0.00226813	0.753772	0.00650648		16985950	MAP1B	0.00506218	1.33895	0.0167894
16959668	CEP70	0.00226873	0.792168	0.0079331		17125188	---	0.00507106	0.605404	0.0141364
16808561	---	0.00228118	0.789293	0.00775126		17110086	RPGR	0.00510444	1.40849	0.0166954
16911330	LOC100128668	0.00228538	1.62353	0.00460455		16845565	---	0.00512572	1.29504	0.0179119
17122034	---	0.00228584	0.809374	0.00848492		16726164	NAA40	0.00516446	0.798143	0.0200657
16967602	MOB1B	0.00228732	1.20249	0.00998162		16734491	PHLDA2	0.0051741	1.16651	0.0278908
16650937	---	0.00229851	0.708601	0.00555526		17074735	FAM86B1	0.00519606	1.3526	0.0174072
16736266	---	0.00231044	1.2625	0.00735671		17015860	---	0.00521308	1.17351	0.0254751
16772829	ZNF891	0.00231549	0.832558	0.00998162		16770733	MED13L	0.0052268	1.28802	0.0196317
16922779	ETS2	0.00231969	1.26917	0.00762049		16988167	---	0.00522721	1.10915	0.0327485
17015681	ADTRP	0.00232715	0.797973	0.00805128		17051626	MEST	0.00523253	0.710073	0.0176705
16725112	OR10Y1P /// STX3	0.00232884	1.23886	0.00826481		16738774	MRPL16	0.00523703	0.892541	0.0318519
17080788	FBXO32	0.00233301	1.23804	0.0085243		17061629	LOC101927974	0.00523961	0.814971	0.0218146
16695345	COPA	0.00233833	1.12443	0.0194624		17054325	---	0.00527294	1.32966	0.0187655
16708089	GOLGA7B	0.00234746	0.794098	0.0079331		17095703	NFIL3	0.00527732	1.40583	0.0170469
17059861	LOC101927525	0.00234856	0.910221	0.0274421		17048188	CLDN12	0.00528	0.920487	0.0475645
16864628	KLK2	0.00235053	1.11093	0.0234849		16720496	---	0.00528336	0.838097	0.0249604
17049939	PMPCB	0.0023586	0.917237	0.0289088		16846887	TMEM100	0.00529117	1.31012	0.018172
17121396	---	0.00236423	0.890316	0.0203387		17078342	TCEB1	0.00530257	0.871946	0.0297363
16731605	SIDT2	0.00236732	1.19196	0.0111936		17102523	LANCL3	0.00530269	1.15323	0.0279587
16910728	SIRPA	0.00237838	1.19454	0.0111119		17092901	CDKN2B	0.00530908	1.46662	0.0154126
17099701	MIR3689D2	0.00239568	1.1595	0.0137832		17118396	---	0.00532343	1.28967	0.018838
16873994	---	0.00239789	1.53841	0.00494707		17085545	LOC100133920 /// LOC101928195 /// LOC101929583 /// LOC102724580 /// LOC105379443	0.00536117	1.82775	0.0142536
16716374	LIPA	0.00239972	1.09964	0.0264378		16762657	---	0.00537867	1.18231	0.0243817
17011185	TSTD3	0.00240662	0.74245	0.00606031		16847933	AXIN2	0.0053915	0.826193	0.0226639
16842292	---	0.0024124	0.872302	0.0170222		16877429	---	0.00539643	1.12361	0.0307437
16928867	MTMR3	0.00241559	1.1922	0.010949		16982314	---	0.00540277	1.11557	0.0319861
16870394	LRRC25	0.00241716	1.29945	0.00681926		17108816	MXRA5	0.00540732	0.636089	0.0157124
16864059	CD37	0.00242511	0.905285	0.023957		16667760	S1PR1	0.0054226	1.31988	0.0179163
16781849	TRAV8-1	0.00242622	0.744506	0.00642947		16933437	MN1	0.00542398	0.724662	0.0176705
16828928	LOC101928582	0.00242971	0.868187	0.0153551		16751700	MFSD5	0.00543388	0.7551	0.0182939
17124820	---	0.00243445	0.676554	0.00573767		16800268	CKMT1A	0.005452	1.37557	0.0176705
17086731	LINC00484	0.00244503	1.19297	0.0112252		16776491	---	0.00545329	1.26758	0.0196957
16777259	LATS2	0.00244579	1.23025	0.00893242		16829158	RNF166	0.00546335	0.743699	0.0180125
17023150	MAN1A1	0.00244877	1.17719	0.0119251		16782118	TRAJ2	0.00546861	1.07623	0.0585063
16985849	---	0.00245057	0.82738	0.00998162		16786064	RGS6	0.00552295	1.37813	0.0176705
16973498	SPON2	0.00246644	1.24854	0.0079331		16845652	RUNDC3A-AS1	0.00554743	1.16147	0.027
17011708	SLC16A10	0.00247791	0.748375	0.00681926		16879385	PKDCC	0.00555579	1.19639	0.022643
17117744	LOC100507131	0.00250845	0.893248	0.0203108		17008542	---	0.00555653	1.15136	0.0279587
17125896	---	0.00251383	1.19555	0.0113599		17030550	---	0.00556993	0.862532	0.0279587
17004859	TMEM170B	0.00252601	1.34145	0.00663424		17069272	CHD7	0.0055826	0.85409	0.0271053
17120688	---	0.00253347	0.790096	0.00828338		17122734	---	0.00558623	1.1829	0.0241633
16894283	MBOAT2	0.00255766	1.22806	0.00875738		16802106	HACD3	0.00560815	0.818594	0.0222149
16969009	PDLIM5	0.00256268	1.26755	0.00784364		16780069	SPRY2	0.00561453	1.21594	0.0221383
16753923	YEATS4	0.00257074	0.808091	0.00883398		16846093	OSBPL7	0.00561501	0.825586	0.0226738
17052591	TRBV3-1 /// TRBV3-2	0.00257783	0.691302	0.00535883		16685031	LOC653160	0.00563743	0.888165	0.0312356
16982047	ACSL1	0.00257916	1.58458	0.00500112		16963127	MUC4	0.00565282	0.860579	0.0278908
17045451	---	0.00258013	1.16339	0.0136054		16870131	HAUS8	0.00565609	0.792932	0.0207096
16880579	---	0.0025809	0.82582	0.0107876		16838382	LOC105371912	0.00565702	0.865425	0.0282842
17005034	LOC102724463	0.0025838	0.848371	0.0120628		17018386	---	0.00566116	0.431063	0.0136265
16660785	NIPAL3	0.00259439	0.815801	0.00902898		17120072	---	0.00567459	1.161	0.0278908
17013279	STX11	0.00259677	1.30951	0.00681926		17021821	---	0.00571532	0.890397	0.0312012
16879883	MSH2	0.00260224	0.822919	0.0096646		16672583	PEA15	0.00573779	0.865113	0.0283283
16990483	ARHGAP26	0.00260263	1.31975	0.00696794		16775136	PCDH17	0.00574523	0.565504	0.0156485
16703150	SPAG6	0.00260338	1.09143	0.0296972		17015003	LOC105374876	0.00574814	1.08469	0.0438573
16941247	IQCF3	0.0026076	0.911294	0.0283523		16722987	LUZP2	0.00576645	0.904524	0.035079
16903327	GTDC1	0.00261901	1.1417	0.0163104		16721479	ILK	0.00577566	0.888202	0.0327485
16971867	TMEM144	0.00263105	1.44465	0.00573767		16694701	CRABP2	0.00578932	0.625382	0.0156083
16911698	CSRP2BP	0.00263575	0.870195	0.0160877		16891616	MRPL44	0.00580469	0.801309	0.0202902
17011450	FOXO3	0.00263958	1.32067	0.00681926		16815810	---	0.00581312	1.20469	0.0233716
16867975	FCER2	0.00264687	0.631666	0.00500112		16796938	CDC42BPB	0.0058292	1.11891	0.0327485
16690172	LOC101928370	0.00264997	0.778883	0.00783804		16787193	---	0.00583912	1.16603	0.027
16729574	RAB30-AS1	0.0026642	0.80763	0.00866814		16951409	SATB1	0.0058532	0.869984	0.0293187
16785952	PCNX	0.00266851	1.1368	0.0187927		16721313	OR52E4	0.00586752	1.19943	0.023136
17108799	ARSE	0.00267963	1.13572	0.0178073		16671889	LAMTOR2	0.00588183	0.807296	0.0211604
17019169	CCND3	0.00268183	1.17876	0.0122434		16653265	---	0.00588572	1.55132	0.0157124
16699932	TMEM63A	0.00268545	0.874145	0.0163357		17063666	---	0.00591176	1.10572	0.0348917
16917867	LINC00656	0.00269921	1.19933	0.010949		17119804	---	0.00595365	0.83085	0.0249604
17122120	---	0.00271284	0.795561	0.00821325		16715079	NEUROG3	0.00595584	1.23483	0.0212633
16764093	---	0.00271317	1.49532	0.00541949		16656089	---	0.0059608	1.37	0.0186416
17127367	---	0.00271861	0.864051	0.0163357		17062280	AASS	0.00598941	1.32408	0.0190675
17007701	ANKS1A	0.00271909	1.14769	0.0163104		17022691	FYN	0.00599992	1.14235	0.0285662
17091212	ESP33	0.00274605	1.12128	0.0205154		16864893	ZNF701 /// ZNF808	0.00600015	1.43948	0.0176705
17106509	---	0.00274951	1.61617	0.00500112		17048450	GNG11	0.0060082	0.75673	0.0207096
17113606	SEPT6	0.00275187	0.88939	0.0201732		17125190	---	0.00602144	0.687209	0.0176705
16672838	FCER1G	0.00276716	1.16785	0.0140771		16826779	DOK4	0.00606257	0.77278	0.0196597
17124664	---	0.00277363	0.754626	0.00681926		16986031	MIR4804	0.00607324	1.16553	0.0264231
17124668	---	0.00277363	0.754626	0.00681926		16745113	BCL9L	0.00608522	0.82122	0.0233716
16975154	RELL1	0.00277424	1.38481	0.00642947		16958629	LOC105374087	0.0060991	1.26155	0.0202902
16940343	KLHL18	0.00278273	1.15254	0.0155237		16961670	NAALADL2-AS3	0.00609913	1.1713	0.027
16711533	PRKCQ	0.00278293	0.887229	0.0204702		16854357	LOC105372027	0.00610565	0.890619	0.0319861
16967853	AREG	0.00278518	1.67245	0.00535883		16655761	---	0.00611402	0.854759	0.0278706
17022362	SESN1	0.0027861	1.39354	0.00642947		16960577	P2RY12	0.00611582	1.27205	0.0196597
17088164	SLC31A2	0.00278659	1.53051	0.00526633		16984730	FST	0.0061261	1.44769	0.0157258
17120142	---	0.00278716	1.40409	0.0062556		16681159	PLEKHG5	0.00613251	0.80813	0.0211011
17120144	---	0.00278716	1.40409	0.0062556		16835447	CALCOCO2	0.00613527	1.241	0.0216794
16856763	---	0.00280242	1.08398	0.0342766		17123636	---	0.00614783	1.14202	0.028968
17008384	TDRG1	0.0028067	0.828018	0.0110583		16880538	EHBP1	0.00615506	0.788258	0.0220271
16782106	---	0.00281213	0.778685	0.0079331		16842501	LOC105371595	0.00616317	1.15288	0.0280526
17063796	TRBV5-4	0.00282169	0.746085	0.00675826		17045003	---	0.00618227	1.10019	0.0367656
16782036	TRAJ44	0.00284221	0.673316	0.00555566		16996664	LOC105378999	0.00621243	1.11069	0.0328427
16947449	MFSD1	0.00285408	1.08556	0.036365		16971465	FAM160A1	0.00622138	1.14446	0.028968
16836985	MAP3K3	0.0028657	1.13157	0.018556		16973278	DBET /// DUX4 /// DUX4L1 /// DUX4L2 /// DUX4L25 /// DUX4L3 /// DUX4L5 /// DUX4L6	0.00623131	0.887291	0.0307437
16938205	SATB1-AS1	0.00289841	0.806114	0.00917246		16973287	DUX4 /// DUX4L1 /// DUX4L2 /// DUX4L25 /// DUX4L3 /// DUX4L5 /// DUX4L6	0.00623131	0.887291	0.0307437
16753853	MDM2	0.00290034	1.21599	0.0103852		16908650	ABCB6 /// ATG9A	0.00623798	1.317	0.0187763
17010625	TPBG	0.00291025	1.222	0.00992661		16701110	MAP1LC3C	0.0062788	1.487	0.0168839
16898326	PELI1	0.00291819	1.29177	0.0079331		16975064	LOC101928622	0.00628891	0.858607	0.0275838
16997678	RASGRF2-AS1	0.00292519	0.830483	0.010949		17034176	---	0.00632577	1.15481	0.0281778
17023707	VNN1	0.00294201	1.39922	0.00654845		17036426	---	0.00632577	1.15481	0.0281778
16782084	TRAJ20	0.00294776	0.762067	0.00750529		16834664	C17orf105	0.00634591	1.15321	0.0284743
16665588	ROR1	0.00295666	0.870732	0.0169128		16771132	RAB35	0.00636265	0.854534	0.0275838
17095341	---	0.00296237	0.863406	0.0154487		16830182	TXNDC17	0.00637464	0.85693	0.0280246
16804804	IQGAP1	0.00296657	1.14461	0.0175391		16887116	---	0.006379	1.22915	0.0222149
16864181	RCN3	0.00297697	1.21876	0.0105468		17124078	---	0.00638701	1.49873	0.0157124
16943789	CD96	0.0029922	0.88373	0.0194624		16652389	---	0.00639037	0.551147	0.0157124
16650143	---	0.00299903	1.14675	0.0169115		16711338	---	0.00639418	1.16673	0.0279059
16910068	MIR4440	0.00300463	1.20387	0.0108996		16979857	---	0.00639535	1.13085	0.030267
17045076	---	0.00305879	0.887816	0.0221124		16986433	CRHBP	0.00641928	0.756635	0.0196597
17106791	---	0.00306159	1.24794	0.00941262		16730033	CCDC67	0.00642283	1.09523	0.0405282
17118218	---	0.00307693	1.28576	0.00821325		16742787	PRCP	0.00642993	0.86331	0.0277284
17029712	---	0.00308237	1.08481	0.0351908		17013843	---	0.00645194	0.872653	0.0286653
17039914	---	0.00308237	1.08481	0.0351908		16793877	GPX2	0.00646938	1.16768	0.027
16994597	FAM134B	0.0030852	0.873728	0.0169115		16769983	GIT2	0.00647844	0.792444	0.0202902
17087979	---	0.00309539	1.27395	0.00831815		16651821	---	0.00648837	0.788597	0.0202902
17036169	---	0.00312107	1.08813	0.0298108		16731253	PTS	0.00651003	0.782282	0.0196597
16665302	HOOK1	0.00312361	0.736006	0.00663424		17000168	CXCL14	0.00656984	1.24712	0.0219893
16967300	UBA6-AS1	0.0031307	0.824251	0.0112054		16832629	LOC105371716	0.00658702	0.863573	0.0284743
17021738	BACH2	0.00316241	0.772187	0.0081574		16850426	---	0.00659158	0.796911	0.0213692
16680962	MIR4689	0.00316742	1.19022	0.0120125		17014166	TULP4	0.00662194	0.870533	0.0285662
17084866	GLIPR2	0.00316904	1.14945	0.0163104		17025483	LOC105378100	0.006667	1.27231	0.0202902
16980938	---	0.00318663	0.843283	0.0140095		16651795	---	0.00667865	0.585654	0.0168839
16877297	TRIB2	0.00326619	0.844511	0.0127524		16943540	---	0.00668786	1.14385	0.0292724
16820556	SNTB2	0.00326832	1.18925	0.0123817		16758135	TMEM120B	0.00669135	0.795796	0.0211011
16864675	CD33	0.00327474	1.11699	0.0223201		16785127	RHOJ	0.00669486	0.845045	0.0263969
16864651	SIGLEC7	0.00327788	1.27427	0.00861358		16996433	PLK2	0.00670713	0.740946	0.0196597
16972750	CDKN2AIP	0.00328028	0.889644	0.0205154		17074449	SGK223	0.00673351	1.28658	0.0193678
17111565	---	0.00328563	0.923738	0.0381423		17121554	---	0.00675528	1.14042	0.028968
17125460	---	0.00328629	1.20743	0.0112414		17123714	---	0.00675721	0.751794	0.0196317
16772768	CHFR	0.00331459	1.08974	0.0301869		17017355	LY6G6E	0.00676067	0.842115	0.0265932
16722299	PDE3B	0.00333699	0.862927	0.0157566		16902535	LIMS2	0.00676951	1.26026	0.0202836
16733435	APLP2	0.00334101	1.13578	0.0191756		16653779	---	0.00680448	1.22147	0.0222149
16820655	CLEC18A /// CLEC18C	0.00334457	1.31583	0.00808992		16817933	PRR14	0.00682978	0.879466	0.0305705
16943490	LOC152225	0.00334993	1.26806	0.00844262		16944929	LOC105374312	0.00683108	0.815615	0.0229335
16917131	---	0.00335257	0.888932	0.0219694		16667752	LOC101928334	0.00683353	1.68816	0.0157445
17015271	---	0.00335365	1.16514	0.0153551		16722217	ARNTL	0.00686565	1.71123	0.0168017
16849026	ACOX1	0.00336726	1.1068	0.0249997		16756645	ACACB	0.00691494	1.33251	0.0200657
16899096	MOB1A	0.00337408	1.08297	0.0351476		17080408	MIR3610 /// RAD21	0.00691704	1.08457	0.0528975
16659140	PLOD1	0.00337432	1.17006	0.015118		16938309	ZNF385D-AS1	0.00692737	1.19946	0.0249604
17002078	GEMIN5	0.00338579	0.855351	0.014873		16776080	CLYBL	0.00695074	0.808074	0.0219893
16774312	---	0.00338833	0.840728	0.0134897		16666738	CYR61	0.00700911	0.792867	0.0211011
16651229	---	0.00339437	0.600018	0.00573767		16818458	LOC102724062	0.00702081	0.755865	0.0197049
16983843	LOC646652	0.00340865	1.46382	0.00719455		17055004	---	0.00703335	1.18476	0.0264231
16782088	TRAJ18	0.00342382	0.75176	0.00779392		16858339	C19orf52	0.00704825	0.842075	0.02671
16721652	OR10AB1P	0.00342482	0.876565	0.0202474		17025152	SERAC1	0.00705595	0.859721	0.0283864
16958974	EFCAB12	0.00343092	1.12073	0.0223277		17043727	SCIN	0.00713861	0.778296	0.0207096
17122726	---	0.00345076	0.884861	0.0207035		16947731	---	0.00713947	0.768571	0.0182797
16658622	CA6	0.0034517	0.743916	0.0075532		16767075	---	0.0071438	1.19917	0.0244942
17089194	ZBTB34	0.00345449	1.13467	0.0202156		16805410	---	0.00718609	1.14373	0.0294628
16656777	---	0.00345894	1.37841	0.00776113		16809511	FAM214A	0.00718745	1.41112	0.0182911
16756212	CHST11	0.0034634	1.15222	0.0170827		16818711	C16orf78	0.00719841	1.27323	0.0207096
16654405	---	0.00346768	1.68418	0.0058475		16908552	IHH	0.00722899	1.16427	0.0271053
16785144	---	0.00347165	0.814821	0.0108208		16807431	C15orf57	0.00725006	0.845022	0.027
17125216	---	0.00347612	0.857468	0.0160437		17094321	---	0.00725194	0.739714	0.0182911
17123604	---	0.0034782	0.905592	0.0266383		16706727	C10orf99	0.00725423	1.21526	0.0234189
17119968	---	0.00348467	0.901695	0.0253394		16812009	LINC00597	0.00725642	0.766209	0.020986
16796262	SERPINA1	0.00351056	1.23342	0.0106355		17120702	---	0.0073068	1.27502	0.0207096
17091273	---	0.00351428	1.13453	0.0194256		16795965	FBLN5	0.00730845	1.22575	0.0229335
16660581	C1QC	0.00351464	1.31034	0.00821325		16650165	---	0.0073307	0.817471	0.023436
17105914	CXorf57	0.00354453	0.856485	0.0150274		16798136	SNRPN	0.00736294	0.698141	0.0196317
16751420	GRASP	0.00354609	1.1938	0.012993		16820845	LOC102725168	0.00736373	1.16038	0.0284743
16912052	NXT1	0.00354699	0.80648	0.00998162		16801035	AP4E1	0.00737657	0.864244	0.0285662
16767335	CPM	0.00357002	1.34614	0.00813851		16721011	TSSC2	0.00738757	0.808635	0.0249051
17005346	---	0.00358583	0.811046	0.0106578		16890207	MAP2	0.00740729	1.29448	0.0207096
17077502	TOX	0.00358726	1.15923	0.0156219		16773493	RASL11A	0.00742049	1.14627	0.030086
16860112	ZNF90	0.00358819	0.789348	0.00876294		16829139	MVD	0.00743071	0.727803	0.0196317
17011798	---	0.00360068	1.24286	0.0108026		16821324	CMIP	0.00743109	0.83119	0.0264463
17002141	HAVCR2	0.00361115	1.35248	0.00781546		16914961	PFDN4	0.00744729	0.776792	0.0213692
17060360	TRIM4	0.00362682	0.918672	0.0308517		16923268	---	0.0074557	0.824916	0.0253597
16910295	LOC200772	0.0036387	1.24583	0.00961538		16967479	CABS1	0.00747275	1.08202	0.0501867
16850595	EMILIN2	0.00363973	1.20496	0.0116553		16962861	LOC647323	0.00748132	1.14926	0.0292724
16827103	TK2	0.00364929	1.20984	0.0113014		17108213	AVPR2	0.00751113	1.32062	0.0202902
16960842	---	0.00366846	0.824676	0.0118153		17051159	HILPDA	0.00751707	0.806821	0.0231645
16769315	C12orf42	0.003685	0.819396	0.0112054		16846439	---	0.00753185	1.13062	0.0305705
16994521	ANKH	0.0036859	0.845683	0.0134676		16997591	MTX3	0.00753788	0.795498	0.0228445
16999574	---	0.00369259	0.79561	0.00967728		16782901	---	0.00755027	1.15023	0.028968
17007029	STK19	0.00369496	1.13473	0.0199028		16796319	---	0.00756343	1.12737	0.0307437
16709333	TCF7L2	0.00369737	1.29596	0.00886373		17065513	CLDN23	0.00761928	0.839667	0.0270207
17092767	MLLT3	0.00370028	0.854048	0.0160877		16729280	---	0.00768487	1.14842	0.0297363
16944647	CSTA	0.00371567	1.14287	0.0175391		16704010	---	0.00772465	1.11682	0.0328271
16837128	PRKCA	0.00372271	0.840353	0.0131417		16740341	---	0.00775186	0.609894	0.0182797
16695769	SH2D1B	0.00373142	1.3427	0.0079331		16748151	---	0.00776542	1.26524	0.0210514
16735804	---	0.00373611	2.14097	0.00572325		16882193	ELMOD3	0.00779946	1.29412	0.0202902
16798212	SNORD116-23	0.00374323	0.733781	0.00728814		16697654	MIR181A1HG	0.00780703	0.753323	0.0196597
16871740	ZNF829	0.0037464	0.755516	0.00857865		16844099	CACNB1	0.00781359	0.870786	0.0298845
16999654	ACSL6 /// MEIKIN	0.00374676	0.832282	0.0118291		16791555	LOC105370425	0.00781568	0.880894	0.0306677
16885324	PROC	0.00375656	0.850628	0.0145179		16965765	---	0.00784752	1.13231	0.0307437
16747969	CLEC4D	0.00376358	1.46292	0.00698359		16782318	CMTM5	0.00788122	0.836658	0.027
16876210	KIR2DL4 /// KIR3DL1 /// KIR3DL3 /// KIR3DS1	0.00376901	1.33406	0.0081574		16705713	---	0.00791097	1.15863	0.0284743
16704375	ALOX5	0.00378413	1.1508	0.0171987		16895014	APOB	0.00793458	1.43875	0.0182959
16815355	IL32	0.00378543	0.812953	0.00998162		16963564	---	0.00795724	0.69136	0.0185805
17075922	KIF13B	0.00379128	1.22383	0.0111748		16691668	NOTCH2	0.00796881	0.872145	0.0301685
16813642	---	0.00379413	0.882642	0.0204702		16752044	MIR148B	0.00797646	0.879661	0.030267
17052619	TRBV20-1	0.00380944	0.726802	0.00759686		16752045	---	0.00797646	0.879661	0.030267
16683788	UBXN11	0.0038125	1.12671	0.0210456		16856803	GADD45B	0.00798062	1.33816	0.0200657
16792859	PYGL	0.00381331	1.24816	0.00989111		17065408	---	0.00799353	0.829256	0.0249604
16715170	PRF1	0.0038164	1.31475	0.00821325		16732878	---	0.0080165	1.2266	0.0241633
16937681	ATG7	0.00381979	1.15058	0.0176239		16798424	SNORD115-40	0.00802393	1.17692	0.0275838
16844381	CCR7	0.00383628	0.796051	0.00961538		16780432	LINC00456	0.00802703	1.13605	0.0305446
17000700	LINC01024	0.00387596	0.837213	0.0131948		16664421	CYP4A22	0.00804045	1.28156	0.0202902
17079910	KLF10	0.00387961	1.24655	0.0100442		16821541	CRISPLD2	0.00807455	1.41414	0.0196636
17118670	---	0.00389116	0.903008	0.0253394		16657159	---	0.0080774	1.25166	0.0224802
16948161	LINC00578	0.0038961	1.17069	0.0155237		16735328	OR10A3	0.00809747	1.08371	0.0504464
16738270	---	0.0038977	0.8238	0.0123324		16674845	LAMC2	0.00809831	1.27407	0.020986
16910375	HDLBP	0.00390756	1.06494	0.0593945		16724570	SLC39A13	0.0081048	0.810481	0.0244699
16929193	PIK3IP1-AS1	0.0039117	1.20126	0.0133609		16933555	C22orf31	0.00811662	1.16517	0.0284743
16812779	---	0.0039178	1.18871	0.0139739		16829417	---	0.00813113	1.07164	0.0638927
16695508	F11R /// TSTD1	0.00391994	0.804947	0.00989111		16976249	LOC105377245	0.0081392	0.836119	0.0259238
16971995	RAPGEF2	0.00392273	1.12963	0.0205179		16798335	SNORD115-17 /// SNORD115-18 /// SNORD115-19	0.00813999	1.10532	0.0356953
17012108	ASF1A	0.00393472	0.871275	0.0176985		16798337	SNORD115-17 /// SNORD115-18 /// SNORD115-19	0.00813999	1.10532	0.0356953
16680657	PANK4	0.00394003	0.891688	0.0221124		16798339	SNORD115-17 /// SNORD115-18 /// SNORD115-19	0.00813999	1.10532	0.0356953
16923239	PDE9A	0.00394811	0.748698	0.00821325		17072847	---	0.00814518	1.18878	0.027
17100201	CLIC3	0.00395087	1.42644	0.0075532		16864600	MGC45922	0.00814626	0.874185	0.030267
16910072	---	0.00396654	1.33975	0.00855329		17125014	---	0.00814732	0.863028	0.0284743
16751190	METTL7A	0.00397525	1.20232	0.0122007		16819994	FBXL8 /// HSF4	0.00816517	0.67507	0.0196957
16845039	RAB5C	0.00398064	1.11365	0.0237287		16962625	TPRG1-AS1	0.00816962	1.60641	0.0176705
17123546	---	0.00398176	1.1203	0.0229466		16774724	CYSLTR2	0.0081823	0.748166	0.0222149
16781904	TRAV17 /// TRDV2	0.00398682	0.765549	0.00858127		17007847	LOC101929309	0.00821654	1.10828	0.0345803
16997279	LINC01336	0.00398821	0.796389	0.00987521		16952527	---	0.00823528	1.31332	0.0207096
16754397	LOC652993	0.00398961	0.843543	0.0140669		17005569	HIST1H1E	0.00825428	0.616341	0.0190675
17125566	---	0.0039993	1.11806	0.0252821		17121114	---	0.00826971	0.829274	0.0266726
17047795	CD36	0.00400666	1.19938	0.0134897		16907912	IKZF2	0.00828632	0.855322	0.0279733
16755171	---	0.00400687	1.24614	0.00944339		16903167	NXPH2	0.00831142	1.16535	0.0280246
16824046	CPPED1	0.00400908	1.29054	0.00917246		16762470	BHLHE41	0.00831612	0.74743	0.0202902
16896087	LOC101929418	0.00401187	1.21388	0.0113014		16958618	---	0.00831638	1.18197	0.0277064
16759048	---	0.00401611	1.18029	0.0157622		16755115	MRPL42	0.00831879	0.852422	0.0284743
16746219	LOC105369576	0.0040238	0.758366	0.00909741		16797841	---	0.00832381	1.277	0.0222149
16982931	UBE2QL1	0.00405345	1.20225	0.0131142		16794966	C14orf1	0.00832889	0.860603	0.0293187
16951306	RFTN1	0.00405429	0.935883	0.0560053		17093713	SIT1	0.0083293	0.774019	0.020986
16854615	CCDC178	0.00405579	0.914676	0.0319258		16706350	C10orf11	0.00834362	0.841334	0.0253597
16699529	LOC105372937	0.00405669	1.24686	0.0103852		16704154	RET	0.00835229	0.622429	0.0194917
16763032	PKP2	0.00406561	1.26473	0.00966711		17101794	S100G	0.00837312	1.09701	0.0400745
16782048	TRAJ38	0.00407687	0.770274	0.00888195		17010544	SH3BGRL2	0.00838606	1.2737	0.0222149
16815461	CLUAP1	0.00408117	0.782587	0.00921138		16657652	MIR200A	0.0083901	1.10907	0.0355049
17007499	SYNGAP1	0.00409348	0.905648	0.0264378		16650537	---	0.00841997	1.49637	0.0179147
16783764	C14orf28	0.00409514	0.855364	0.0149566		16826581	LOC100996338	0.00842577	1.14879	0.0293187
16802967	CCDC33	0.0040965	1.22283	0.0119858		16883905	---	0.00844363	1.13207	0.0307437
16787938	LOC101929080	0.00410145	1.15083	0.0176985		17043843	TSPAN13	0.00844764	1.30626	0.0207096
17122488	---	0.00411456	1.15994	0.0167384		17013520	SASH1	0.00848267	1.32332	0.0207096
16916462	SIRPB2	0.00411483	1.39498	0.0079331		16801941	SNX1	0.00852876	0.9049	0.0371801
16918307	NOL4L	0.00411984	0.907981	0.0272357		16749459	PPFIBP1	0.00852975	1.26606	0.0222149
17052603	IFI6 /// TRBV6-1	0.00412803	0.783636	0.00923195		16711484	IL15RA	0.0085498	1.25891	0.0233716
16850264	WDR45B	0.00413281	1.06899	0.0542792		17126292	---	0.00855682	0.926151	0.0622415
17110058	DYNLT3	0.0041456	0.838555	0.01237		16830302	ACADVL	0.00857886	0.88723	0.0317322
16659054	AGTRAP	0.00415125	1.18111	0.0144158		16762796	---	0.00859797	0.707293	0.0202902
16851121	SEH1L	0.004156	0.879629	0.0194863		17015915	---	0.00859968	0.765514	0.022643
16855382	TCF4	0.00416587	0.910452	0.0277222		16829170	PIEZO1	0.00860203	1.11606	0.0328427
16867047	AES	0.00419855	0.854258	0.0147825		17087206	---	0.00861882	0.808326	0.0247305
16760523	ACRBP	0.00421026	1.09282	0.0289088		17006312	---	0.00862631	2.68063	0.0177883
17111895	IL2RG	0.00421583	0.903057	0.0249573		16656955	---	0.00863301	1.34006	0.0202902
17111738	OPHN1	0.00422537	1.21839	0.011487		16928626	LOC102724900	0.00863705	0.831127	0.0271019
16670527	RPRD2	0.00422622	0.898485	0.0243088		16870417	ELL	0.00870991	1.25331	0.0229335
16733851	IFITM3	0.00424103	1.4549	0.0072932		16796768	---	0.00871185	1.17263	0.027
16793805	ZBTB25	0.00424795	0.876106	0.0187483		16796150	---	0.00871439	1.18266	0.0270207
16754574	---	0.00425174	0.863699	0.0176948		16734397	TH	0.00871463	1.15184	0.029624
17103989	---	0.00425454	0.880076	0.0208801		16715738	DUSP13	0.00871994	1.20604	0.0259238
16839683	OR3A2	0.00426007	0.795775	0.0105468		16798965	RYR3	0.00872486	1.15051	0.0302549
16803533	HYKK	0.0042622	0.721159	0.00779816		16938583	STT3B	0.00874911	0.834943	0.0268362
16930854	FAM109B	0.00427166	1.14848	0.0175391		17124730	---	0.00875944	1.13992	0.0305431
16870931	IPO5P1	0.00427692	0.774581	0.00930749		17121470	---	0.00876373	1.22351	0.0237305
16837205	NOL11	0.00428799	0.871718	0.0177122		17058787	POM121C	0.00877318	0.842401	0.0277284
16655033	---	0.00429775	1.68884	0.00691724		17085404	---	0.00877681	1.22295	0.023436
16937162	---	0.0043163	1.1575	0.0178233		16780268	LOC105376685	0.00879476	0.848232	0.0280246
17123882	---	0.00432258	0.769083	0.00921138		16823889	MIR548H2	0.00881796	0.633014	0.0196597
17052587	TRBV2	0.00432488	0.758787	0.00899321		17063767	TRBV6-9	0.00882193	0.781328	0.0219893
16971494	---	0.00433882	1.1457	0.017412		16964142	RNF4	0.00882527	0.888122	0.0323943
16782016	TRAJ56	0.00434636	0.729325	0.00821325		16812940	---	0.00884436	0.660042	0.019094
16826160	SHCBP1	0.0043718	1.2396	0.0112054		16674330	TOR3A	0.00884774	0.856301	0.028968
16650711	---	0.00437284	1.36861	0.00866814		16873114	LYPD5	0.00884813	1.10677	0.0365208
16766283	PTGES3	0.00437724	0.907296	0.0268108		16703563	BAMBI	0.00886086	0.855056	0.0285662
16934198	SLC5A4	0.00439142	1.18609	0.0139474		16656145	---	0.00886225	1.46679	0.0196317
17068724	SPIDR	0.00439272	1.21061	0.0120628		17105862	NRK	0.00890104	0.803177	0.0230361
17051191	LOC101928451	0.00439364	1.24907	0.0110918		16841525	HS3ST3A1	0.00891999	1.12121	0.0328427
16830577	CD68	0.00440525	1.13515	0.0207369		17081124	FAM49B	0.00894143	0.732632	0.0202902
17123690	---	0.00441877	0.836923	0.0122434		16904315	GCG	0.00896962	1.09521	0.0406424
16871085	TSHZ3	0.00442018	1.2017	0.0133625		16746450	B3GAT1	0.00898501	0.808887	0.0218425
16763322	---	0.00442551	0.896653	0.0253685		16782050	TRAJ37	0.00898756	0.547526	0.0176705
17121398	---	0.00442815	0.93368	0.0513351		16910698	SNPH	0.0089904	0.897467	0.0361717
17005089	---	0.00445156	1.10877	0.0252686		16927831	IGLV2-8	0.00901071	0.771999	0.022094
17063948	EPHA1	0.00445348	0.860585	0.016127		16716846	ALDH18A1	0.00903342	0.777185	0.0222149
16948278	ACTL6A	0.00445555	0.88976	0.0211243		17052534	MGAM2	0.0090394	1.18279	0.0278706
16742375	LOC101928813	0.00446288	1.19442	0.01371		16936452	PLXNB2	0.00904474	0.815785	0.0246652
17059119	SEMA3C	0.00446398	1.47084	0.0079331		17012662	---	0.00907244	1.2608	0.0229335
16914671	CSE1L	0.0044711	0.92172	0.0324018		16806692	CHRFAM7A /// ULK4P1 /// ULK4P2 /// ULK4P3	0.00909806	0.866337	0.030267
16830302	ACADVL	0.00448357	1.17047	0.0156341		17056861	AMPH	0.0091152	1.36027	0.0207863
16879958	FOXN2	0.00450381	1.08492	0.0340392		16716027	ANXA11	0.00914636	0.852842	0.0284743
16762337	BCAT1	0.00450571	1.18686	0.0135466		16952278	---	0.00915423	1.22223	0.0254751
16781863	TRAV8-2	0.00451168	0.725001	0.00861358		16783462	---	0.00917052	1.19636	0.0264463
16823984	BCAR4	0.00454111	0.821172	0.0122984		16674618	IER5	0.00918565	0.795696	0.0229335
16676795	CR2	0.00454235	0.631933	0.00697739		16678327	---	0.00923355	1.4108	0.0202902
16836528	YPEL2	0.00454873	1.16731	0.0163104		16740778	SLC29A2	0.00923754	1.44875	0.0196957
17043702	TMEM106B	0.00455024	0.782062	0.00994237		17107695	---	0.00923828	1.21271	0.0252906
16865484	KIR2DL1 /// KIR2DL3 /// KIR2DS1 /// KIR2DS4 /// KIR3DP1	0.00455093	1.26667	0.0105772		16858830	IER2	0.0092834	0.828073	0.0258284
17125568	---	0.00456292	1.10735	0.0274147		16654627	---	0.00928613	2.01705	0.0186414
16880736	CEP68	0.00457129	0.919246	0.033106		17017746	PRRT1	0.00928914	1.37022	0.0206677
16924061	DIP2A-IT1	0.00457562	1.46327	0.0079331		16857921	---	0.00929028	0.704127	0.0182939
16725468	CD5	0.00457615	0.804105	0.0106475		16760406	MRPL51	0.00931866	0.901007	0.0396551
16971424	---	0.00459503	0.913972	0.0289256		17127249	---	0.00938671	1.09992	0.0391842
17125264	---	0.00459576	1.35479	0.00862469		16959835	---	0.00938852	1.17952	0.0279587
17023677	STX7	0.00460548	1.07297	0.0503756		17104126	---	0.0094036	1.38748	0.0196957
17023405	THEMIS	0.00460915	0.907121	0.0264592		16728227	MYEOV	0.00940955	1.18435	0.0284743
16721715	RPL27A	0.00461501	0.933522	0.0472068		17021404	---	0.00942089	1.11028	0.0340184
16881660	MTHFD2	0.00462499	1.12456	0.0220114		16654501	---	0.00945224	0.635291	0.0196957
16976219	---	0.00464697	1.24029	0.0110567		17069412	YTHDF3	0.00945676	0.907771	0.0440189
17087185	---	0.00464831	1.11148	0.0253394		17069928	LOC102724772	0.00951899	1.19748	0.0275838
16782072	TRAJ26	0.00466715	0.753081	0.00919735		16851801	RNF125	0.00952064	1.38369	0.0207368
17063996	ARHGEF35	0.00467596	0.816719	0.0125054		16981606	HPGD	0.00957276	1.28062	0.0216329
16730387	---	0.0046936	0.858116	0.0171301		16989897	CXXC5	0.00958282	0.724401	0.0211092
17111769	PJA1	0.00469511	0.784935	0.00998162		16682487	IFFO2	0.00958347	0.774754	0.022643
17088541	LOC105376244	0.00469687	1.36208	0.00821325		16672373	PYHIN1	0.00961082	0.699197	0.0202902
16835627	---	0.00470983	2.24092	0.00681926		16819181	OGFOD1	0.00965332	0.822216	0.0268922
17005276	SOX4	0.00472664	1.27691	0.0102389		16793613	SIX1	0.0096547	0.856289	0.0284743
17086708	SYK	0.00474183	1.15128	0.0180601		16789869	POTEG /// POTEM	0.00965779	1.14789	0.0302338
17084415	---	0.00474946	1.37009	0.0087224		16692334	LINC00624	0.0096669	1.1699	0.0281778
16891752	AGFG1	0.00477507	1.17423	0.0155237		16959478	KY	0.00967012	0.917544	0.0466038
16944344	ARHGAP31	0.00477557	1.11739	0.0229991		16993291	ZNF354B	0.00967412	1.21695	0.0253597
16791401	SDR39U1	0.0047885	0.895625	0.0223761		16920742	MIR298	0.00967748	1.27068	0.0219893
16968008	SHROOM3	0.00483623	1.15075	0.0182589		16751857	TARBP2	0.0097142	0.863938	0.030267
16787772	LINC00521	0.00484447	1.20354	0.0140669		16682989	ECE1	0.00975818	1.29305	0.0222991
16930144	APOBEC3A /// APOBEC3A_B /// APOBEC3B	0.00484911	1.3239	0.00961538		17124494	---	0.00976762	1.13834	0.0306222
16747958	CLEC6A	0.00485366	1.41585	0.00903836		16988913	---	0.00976981	0.595461	0.0196597
16944618	CD86	0.0048829	1.2028	0.0140669		16816978	SCNN1B	0.00979879	1.52105	0.0196597
16688537	LRRIQ3	0.00488614	0.874421	0.019639		16891969	---	0.00983129	1.14449	0.0301503
17112339	TAF9B	0.00488833	0.817354	0.0120784		16854594	GAREM1	0.00983878	1.5868	0.0202836
16803613	---	0.00489711	1.34445	0.00888195		16651175	---	0.00984664	1.49505	0.0202902
16824208	KIAA0430	0.00490055	0.948436	0.0981418		17098974	DOLK	0.00987309	0.82249	0.0277064
16958096	WDR5B	0.00492012	0.821001	0.012561		17122658	---	0.00991284	0.853167	0.0292724
16809403	MYO5C	0.00492034	1.18441	0.0155237		17075868	MIR4288	0.00992339	0.618592	0.0196597
16685719	HPCAL4	0.00492869	0.894956	0.0221124		16791991	NFKBIA	0.0099353	1.40378	0.0202902
16962407	DGKG	0.00496799	1.2935	0.0100442		16862033	SUPT5H	0.00997342	0.886892	0.0327588
17083381	RIC1	0.00497374	1.22701	0.0127524		16885849	---	0.00999981	0.832683	0.0271366
16734570	OSBPL5	0.0049961	1.18676	0.0147825		16827227	RRAD	0.0100041	1.19181	0.0275838
16830789	CHD3	0.00501526	0.892554	0.0227838		16883848	LOC101927383	0.0100279	1.07876	0.0603347
16797583	IGHA1 /// IGHG1 /// IGHV3-64	0.00501751	0.679159	0.00821325		17059567	STEAP4	0.0100332	1.41634	0.0202902
16902279	TFCP2L1	0.00502935	1.2048	0.0138574		16828196	---	0.0100407	0.840768	0.0281778
16656103	---	0.00503987	1.11364	0.0243088		16806093	MAGEL2	0.0100569	0.806619	0.0271053
16655433	---	0.00505151	1.6404	0.0079331		17019549	MRPL14	0.0100868	0.853043	0.0289815
17117443	---	0.00505951	1.39897	0.00861358		16873391	SNRPD2	0.0101061	0.923734	0.0606089
16696276	SCYL3	0.00505991	0.871355	0.019165		16921627	MIR99AHG	0.0101515	0.755718	0.0228445
17122030	---	0.0050735	0.826972	0.01371		17125420	---	0.0101525	1.17141	0.0285662
17076861	CEBPD	0.00508064	1.32877	0.00958167		16895744	MPV17	0.0101686	0.848384	0.0279733
16742202	ARRB1	0.00511242	1.07927	0.0355126		16653657	---	0.0101906	0.724755	0.0220271
16937943	SLC6A6	0.0051378	1.16385	0.0172085		16737580	LOC105376651	0.0101954	1.19813	0.0279587
17053379	GIMAP7	0.00514296	0.876403	0.0187091		17074400	FAM90A7P	0.0102131	0.807738	0.0259238
16723400	HIPK3	0.005156	1.13812	0.0209223		17010809	SMIM8	0.0102419	0.846352	0.0280526
17012404	RNF146	0.0051594	1.15686	0.0176985		17072958	---	0.0102567	0.893296	0.0327485
16771680	CLIP1	0.00515956	1.14159	0.0198002		17056857	TRGV1	0.0103316	1.25329	0.0240332
16801644	RORA-AS1	0.00516018	0.912235	0.0290191		16674130	---	0.01038	1.19818	0.0278908
16871305	ZNF792	0.00516953	0.860856	0.017362		16992464	---	0.0103872	0.877682	0.0319861
16959579	---	0.00517217	1.2105	0.0131905		16786941	AHSA1	0.0103927	0.883701	0.0318519
16870667	GMIP	0.00518415	1.17861	0.0153551		16834523	AOC4P	0.0104337	1.55454	0.0203549
16913761	PLCG1	0.00518826	0.864298	0.0175391		16885144	LOC105373586	0.0104368	0.856847	0.028216
16704211	LOC105378272	0.00519036	1.15557	0.0177122		16819039	IRX5	0.0104526	1.20901	0.027
16703642	MAP3K8	0.0051969	1.21403	0.0134897		16652301	---	0.0104642	0.547086	0.0196597
16969558	SGMS2	0.00520709	1.36994	0.00917246		16927710	VPREB1	0.0104688	1.14422	0.0304698
17104176	UBQLN2	0.00522595	0.859366	0.0170222		16765788	---	0.0104838	1.17533	0.0281778
16960554	GPR171	0.00523334	0.806064	0.0116675		16905076	SLC25A12	0.0104875	1.20601	0.0270752
16916858	---	0.00525034	0.816322	0.0126225		16849286	ST6GALNAC1	0.0105015	1.09422	0.0421171
17123920	---	0.00525322	0.785352	0.0104457		17122642	---	0.0105292	0.868032	0.0303544
16781856	TRAV10	0.00526167	0.646679	0.0080517		17117565	---	0.0105743	0.765206	0.0229335
16656323	---	0.00527537	1.43765	0.00875738		17057143	PGAM2	0.0105823	0.768891	0.0243056
16825638	YPEL3	0.00527899	0.92118	0.0321143		16970590	---	0.0105841	1.19061	0.0279733
16651159	---	0.00528919	1.65053	0.0079331		16752217	GDF11	0.0106131	0.803678	0.0260331
17115850	CSF2RA	0.00529705	1.3312	0.00975127		16655519	---	0.0106166	1.16558	0.0297363
17042860	GPER1	0.00530057	1.25255	0.0111119		17003815	TBC1D9B	0.0106289	0.882165	0.0328427
16838271	TNRC6C	0.00530625	0.908687	0.0277033		16884020	SULT1C3	0.0106309	1.14337	0.0307437
16811469	ADPGK	0.0053123	1.11031	0.0255608		17124744	---	0.0106321	1.14816	0.0305431
16749782	FGD4	0.00532371	1.35952	0.00917748		16776420	---	0.010649	1.16642	0.0294071
16779995	RNF219	0.00532621	0.849299	0.0155892		16965900	LOC101928721	0.0106688	0.696357	0.0207096
16782110	TRAJ6	0.00532717	0.701876	0.00888195		17011268	---	0.0107012	1.14294	0.0302071
16898846	CLEC4F	0.0053314	1.28735	0.0099933		16655127	---	0.0107366	0.627075	0.0202902
16787208	GPR65	0.00534315	1.09654	0.028541		16708260	OLMALINC	0.0107602	0.794974	0.0249604
16887697	---	0.00536905	1.11131	0.0253685		17115453	MECP2	0.0107776	0.918626	0.0564588
16821562	KIAA0513	0.00538531	1.12811	0.0205154		16838783	LOC105371925	0.0107795	1.18063	0.0282757
17113079	MORC4	0.00538608	0.882785	0.0205179		16827019	LOC105371301	0.0108192	1.25405	0.0253352
16673601	METTL11B	0.00539586	0.883853	0.022228		16689941	---	0.0108442	1.33518	0.0222149
16922011	BACH1	0.00539832	1.19951	0.0145179		16770712	---	0.0108512	1.33975	0.0222149
16784201	PTGDR	0.00540101	1.35279	0.00973781		17117964	---	0.0108698	0.838684	0.028968
16879764	RHOQ	0.00541097	1.10588	0.0264378		16684152	DNAJC8	0.0108798	0.884117	0.0348064
16958953	CNBP	0.00541703	0.921273	0.0359209		16867223	---	0.010882	1.15773	0.0281778
16977789	KLHL8	0.00541981	1.13543	0.0212485		16828228	C16orf47	0.0108959	1.0986	0.0406949
16887237	DHRS9	0.00542226	1.24388	0.011447		17114604	MIR504	0.0108962	0.813069	0.027
17081124	FAM49B	0.00542483	1.13898	0.0196813		16678676	LOC101927604	0.0109087	0.900089	0.0362416
16837681	CDR2L	0.00542927	1.18853	0.0155237		16883647	IL1R1	0.0109097	1.16603	0.028528
17027082	---	0.00543078	1.06227	0.0781037		16770465	---	0.010931	1.43502	0.0210514
16826606	CRNDE	0.00543581	1.18746	0.0160877		16972950	ANKRD37	0.0109509	0.829406	0.0271053
16908998	WDFY1	0.00544575	1.14305	0.0193429		16656773	---	0.010953	1.32141	0.0224802
17121740	---	0.00544616	1.1279	0.0215378		16890419	LOC105373864	0.010973	0.905433	0.0377796
16763600	AMIGO2	0.00545213	0.840456	0.0157622		16917635	---	0.0109735	1.16921	0.0292724
16748205	CLEC2D	0.00545753	0.87906	0.0204702		17124362	---	0.0109896	1.11159	0.0341957
16709298	VTI1A	0.00546215	1.14162	0.0201732		16941993	ARHGEF3-AS1	0.0109952	1.15433	0.029624
16668772	CTTNBP2NL	0.00546436	1.1671	0.0171987		16771361	---	0.0109989	1.21822	0.027
16943181	GPR15	0.0054655	0.832147	0.0139741		16925902	LINC00479	0.0110136	0.873973	0.0307437
16774303	RGCC	0.00548673	0.796168	0.0111182		16844600	KRTAP4-11	0.0110287	1.23992	0.0254751
16881676	---	0.00549204	0.881738	0.0218068		16908490	CRYBA2	0.0110438	1.15567	0.029624
16656743	---	0.0054985	1.33584	0.00975127		16676693	PFKFB2	0.0110546	0.839225	0.0285662
17110495	UXT	0.00551673	0.808115	0.0120875		16930768	SREBF2	0.0110572	0.846065	0.0281778
16965997	---	0.00552003	0.748986	0.00964225		16655149	---	0.0110573	0.623707	0.0207096
17124666	---	0.00552396	0.854666	0.0171976		16773243	TPTE2P6	0.0110793	0.821744	0.0261168
16675903	RNPEP	0.00552601	1.11672	0.0231319		16712305	LOC105376438	0.01109	1.09407	0.0444507
16974317	ZNF518B	0.00558894	0.882785	0.0204734		17015499	OFCC1	0.0110955	1.14851	0.0305431
16781923	TRAV22	0.0055969	0.728948	0.00904156		16981776	---	0.011105	1.19538	0.0278908
16793623	SIX4	0.00559999	1.15168	0.0190235		16950392	---	0.0111092	0.870671	0.0307437
16653485	---	0.00560812	1.51273	0.00851613		16734355	H19 /// MIR675	0.0111446	0.81729	0.028216
17058582	ABHD11	0.00560905	0.890679	0.0222895		16731132	DIXDC1	0.0111487	0.816452	0.0270752
16986203	HEXB	0.00562162	1.09679	0.0294493		16986648	LOC102724557	0.0111615	0.904988	0.0395522
16781937	TRAV25	0.00562459	0.68518	0.00888195		16656117	---	0.0111911	0.625777	0.0206677
16676619	RASSF5	0.00564482	0.897247	0.0257955		16650249	---	0.0111965	1.32096	0.0222149
16897026	ZFP36L2	0.00564494	1.20482	0.0138506		16752389	RPS26	0.0112016	0.87148	0.0305705
16984757	LINC01033	0.00567045	1.11568	0.0253956		17091119	OBP2A	0.011207	0.729541	0.0223988
16804687	MESP2	0.0056719	1.16988	0.0165283		16709453	ADRB1	0.0112333	0.792559	0.024948
16881179	LOC105374793	0.00567937	1.194	0.0162484		17050350	LRRN3	0.0112772	0.719402	0.0219893
17063821	TRBV9	0.00569159	0.687951	0.00888195		16774614	RNU6-68P	0.0112787	1.09108	0.0465575
16842850	DHRS13	0.00570447	0.795684	0.0114259		16864829	ZNF610	0.0112914	0.741902	0.0228752
16789059	RCOR1	0.00570715	1.08738	0.0339839		17123844	---	0.011334	1.16543	0.0297882
16939281	---	0.00572494	0.608422	0.00860254		16842766	SDF2	0.0113417	0.854203	0.0295536
17119338	---	0.00572494	0.608422	0.00860254		16654187	---	0.0113492	0.646876	0.020986
16671782	---	0.00576545	0.811821	0.0128597		16788576	SNORD113-3	0.0113761	0.771057	0.0244699
16780585	GPR18	0.00581082	0.740794	0.00989111		16946635	---	0.0113829	1.18716	0.0284743
16735764	MRVI1	0.00582631	1.14476	0.0199839		16747211	PLEKHG6	0.0113858	0.798885	0.0263969
16755820	---	0.00583338	0.87286	0.0205154		16847644	SMARCD2	0.0113896	1.24604	0.0246177
16680446	NADK	0.0058348	1.14212	0.0203387		16912077	---	0.0114039	1.1174	0.0341287
16797591	IGHM /// IGHV1-69 /// IGHV1-69-2	0.00584138	0.804681	0.0131948		16975971	LNX1	0.0114428	1.50537	0.0202902
16901200	RNF149 /// SNORD89	0.00587885	1.23373	0.0125479		16742106	KCNE3	0.0114796	0.77648	0.0244699
16915484	C20orf197	0.00590551	1.18921	0.0155237		16996582	ERCC8	0.0115037	1.10232	0.0379166
16782024	TRAJ50	0.00591249	0.730297	0.00989111		17103626	GAGE12D /// GAGE12F /// GAGE12I /// GAGE13 /// GAGE2A /// GAGE2B /// GAGE2C /// GAGE2D /// GAGE2E /// GAGE4 /// GAGE5 /// GAGE7 /// GAGE8	0.0115224	1.14229	0.0307437
16921901	LOC105372761	0.00593481	0.823191	0.0148969		17062955	LINC-PINT	0.0115298	1.1458	0.0309652
16952841	FYCO1	0.00593543	1.10015	0.0283322		17030426	---	0.0115371	1.28088	0.0243056
17029807	---	0.00595251	1.12071	0.0253685		16987531	ERAP2	0.0115414	0.774351	0.0253597
16884372	MERTK	0.00596341	1.30271	0.0108026		16760603	MLF2	0.0115537	0.910872	0.0444741
16708552	NOLC1	0.00597486	0.851585	0.017123		16692594	---	0.0115702	1.22885	0.0259238
16956194	MIR1284	0.00599757	1.39362	0.00969141		16815498	GLIS2	0.0115891	0.82684	0.0278908
16894119	CMPK2 /// NRIR	0.00601301	1.18573	0.0143248		16787204	---	0.0115894	1.15816	0.0298564
16675731	IGFN1	0.00601356	1.17069	0.0178233		16668550	RBM15	0.0116191	0.837813	0.0281778
17052648	PRSS1 /// TRBV29-1	0.00601654	0.785993	0.0112228		17066917	---	0.0116406	1.06184	0.102624
16715241	PSAP	0.00606913	1.12013	0.0231441		16729777	---	0.0116413	0.674888	0.0211036
16776658	ATP11A	0.00607437	1.18861	0.0163104		17100871	---	0.0116438	0.841392	0.0282517
16974529	FGFBP2	0.00607498	1.27637	0.011447		16943278	TMEM30C	0.0116643	1.07564	0.0650609
16664597	---	0.00608269	1.2066	0.0143713		16695490	F11R	0.0116796	0.863693	0.0301503
16932008	BID	0.00608421	1.07929	0.0395365		16915448	FAM217B	0.011686	1.21224	0.0278908
16978568	CENPE	0.0060895	1.22946	0.0120875		16654005	---	0.0117066	1.32548	0.0224802
16965942	TBC1D1	0.00609703	1.08141	0.0405418		16918224	DEFB121	0.0117311	1.14375	0.0307437
16829690	RAP1GAP2	0.00611523	1.19717	0.0155237		17033255	---	0.0117381	0.868664	0.030267
16938378	NR1D2	0.00612459	0.91723	0.0322798		16860376	LINC01532	0.0117387	0.924599	0.0609409
17022350	---	0.0061526	0.417637	0.0079331		16983412	FBXL7	0.0117796	0.825031	0.0277064
16981039	---	0.006161	1.20649	0.0152403		17112213	ABCB7	0.011795	1.18847	0.0281465
16743111	CTSC	0.00616468	1.12435	0.0231441		16713887	LOC101929216 /// LOC105378291	0.0117982	0.767495	0.0237305
16732755	GRAMD1B	0.00616635	1.2883	0.0112054		16884200	SOWAHC	0.0117991	0.853007	0.0294628
16713754	ANXA8 /// ANXA8L1 /// LINC00842	0.00617859	1.18037	0.0170222		17027101	---	0.0118075	0.82684	0.028968
17066278	LPL	0.00618428	1.17909	0.0166512		16695572	PFDN2	0.011827	0.848408	0.0298845
16821621	IRF8	0.006192	1.11364	0.025055		17117594	LOC100996701	0.0118361	0.865023	0.0307437
16758442	CCDC62	0.00619208	0.844583	0.0165286		16975157	RELL1	0.01185	1.14345	0.0306906
16956962	---	0.00620003	0.850536	0.0163104		16864160	---	0.0119128	1.61568	0.0207096
16930077	CBY1	0.00620529	0.859247	0.0176985		16827645	COG8 /// PDF	0.0119151	0.827568	0.0278908
16760691	C1R /// C1RL	0.00621085	1.15645	0.0195523		16736470	---	0.0119195	0.750862	0.0240909
16939507	---	0.00621636	0.856782	0.0169115		17044411	---	0.0119268	0.824276	0.0273666
16868162	PRAM1	0.00621734	1.23759	0.0134897		17121442	---	0.0119421	0.679587	0.0206677
16758569	C12orf65	0.00622447	0.818955	0.01371		17081297	---	0.0119623	0.753547	0.0228445
16696504	GAS5 /// SNORA103	0.00622915	0.86607	0.0187091		16667277	LOC100129046	0.0119745	1.2805	0.0233716
16778921	ESD	0.0062318	0.898762	0.024929		16993557	---	0.0120427	1.14735	0.0309652
17114970	GABRE	0.0062331	1.17608	0.0172592		16844985	ZNF385C	0.0120576	0.862	0.030267
17120702	---	0.00624581	0.847065	0.0163104		16781945	TRAV8-7	0.0120743	0.864537	0.0319778
16795192	SPTLC2	0.00625208	1.19764	0.0157951		16983401	LOC105374661	0.0120815	1.1941	0.0281465
16854951	---	0.0062532	1.18975	0.0169012		16894478	FLJ33534	0.0120932	0.885461	0.0321792
16765226	ITGB7	0.0062567	0.814595	0.0132125		16747946	---	0.0121153	1.12921	0.0319861
16698249	---	0.00625702	1.52205	0.00921138		16743091	FZD4	0.0121612	1.30334	0.0269755
16884903	DDX18	0.00625978	1.14615	0.0194056		17004849	LOC105374928	0.0121745	1.10585	0.0372299
16821777	---	0.0062652	1.29405	0.0111936		16985569	---	0.0121943	1.13449	0.0319861
16776339	TNFSF13B	0.00628389	1.17698	0.0169012		16969197	MTTP	0.0122349	1.1855	0.0281778
16681576	C1orf127	0.00630953	0.84364	0.0163104		17125294	---	0.0122569	0.865437	0.0305705
16998532	ST8SIA4	0.00631248	1.189	0.0163104		16840170	CAMTA2	0.0122739	0.851761	0.0294628
16702105	FBXO18	0.00634517	0.940073	0.0680845		16824309	ABCC6	0.0122775	0.753015	0.0229335
16736886	---	0.00634774	0.855325	0.0180601		17124156	---	0.0122895	0.804486	0.0236057
16849556	CEP295NL /// TIMP2	0.0063491	1.17148	0.0175045		16810362	USP3-AS1	0.0122896	0.865377	0.0307437
16736217	---	0.00637246	0.892272	0.0234292		16652117	---	0.0122963	1.24963	0.0261168
16658412	---	0.00637775	0.759027	0.0109666		16874002	---	0.0123086	1.53648	0.0219893
16727891	CABP4	0.00639656	1.11493	0.0247786		17017200	---	0.0123274	2.50651	0.0202902
17124204	---	0.00639688	0.933968	0.0526511		17125308	---	0.0123321	1.07732	0.0636337
16854316	OSBPL1A	0.00640423	1.23133	0.0138101		17114308	MIR92A2	0.0123443	1.13874	0.0315687
16824004	GSPT1	0.00642879	0.924129	0.0375078		16688223	---	0.0123707	1.10024	0.0388546
17115782	CLIC2	0.0064306	1.34215	0.010727		17000193	LECT2	0.0124029	1.15309	0.0302549
16726925	SSSCA1	0.00643598	0.830067	0.0152737		16887702	ITGA6	0.0124094	1.22206	0.0278908
17123148	---	0.00645078	0.83136	0.0152403		16945907	SRPRB	0.0124156	0.839144	0.028654
17061119	RASA4 /// RASA4B	0.00645751	1.16848	0.0178986		16797123	LOC105370708	0.0124235	1.2212	0.0270207
17107293	HTATSF1	0.00646806	0.926973	0.0439066		17122510	---	0.0124304	0.88134	0.0319861
16876269	KIR2DS3 /// KIR2DS5	0.00647117	1.17857	0.0160877		16663294	PPIH	0.0124487	0.882813	0.0327485
16689447	GEMIN8P4	0.00648715	1.24728	0.0131782		17006378	TUBB	0.0124491	0.8379	0.0294628
16993343	---	0.00650045	1.18978	0.0162507		16656217	---	0.0124839	1.36004	0.0222149
16651995	---	0.0065187	1.30919	0.0108026		16896864	C2orf91	0.0124954	1.13553	0.0327588
16652659	---	0.0065187	1.30919	0.0108026		16913378	EEF1A2 /// RPN2	0.0125004	0.904285	0.0367656
16914925	TSHZ2	0.00652432	0.821399	0.0145179		16977925	FAM13A	0.0125173	1.34155	0.0229335
16967875	PARM1	0.00654201	0.791613	0.0120628		17077818	LOC102724687	0.0125211	0.777438	0.0251777
16782096	TRAJ13	0.00655389	0.746165	0.0109291		17125106	---	0.0125362	1.30793	0.0244942
17122650	---	0.00655463	1.15793	0.0185129		16984287	PTGER4	0.0125376	0.727576	0.0217894
16821162	NUDT7	0.00656307	0.848011	0.0175045		16897932	MIR4432HG	0.0125376	1.09325	0.0445504
16657445	OR4F5	0.00656927	1.42352	0.0106475		16656625	---	0.0125479	0.717281	0.0222149
16782120	TRAJ1	0.00657888	0.671788	0.00952178		16710017	ATE1-AS1	0.0125728	0.817953	0.0279587
17116116	TSPY3	0.00659132	1.15812	0.0193249		17098863	---	0.0125798	1.13733	0.0309652
16721310	OR52N2	0.00659953	0.86507	0.0182645		16878994	RASGRP3	0.0125808	0.730284	0.0224802
16765744	CD63	0.00661437	1.16285	0.0182845		17085760	MAMDC2	0.0126117	1.44965	0.0222149
16761176	KLRB1	0.00661633	1.15369	0.0192717		16681576	C1orf127	0.012627	0.850404	0.0285662
16895179	TP53I3	0.00661634	1.2256	0.0145179		16823690	---	0.0126492	1.28156	0.023136
17120254	---	0.00661915	0.823325	0.0145179		16656357	---	0.0126512	1.26412	0.0275838
17078887	---	0.00662289	0.840942	0.0166055		17021478	AKIRIN2	0.0126555	0.921669	0.0617733
16722278	SPON1	0.0066656	0.875998	0.0205154		17123618	---	0.0126573	1.12023	0.0328427
16782818	LTB4R	0.00667206	1.22079	0.014266		16913493	RPRD1B	0.0126579	1.15561	0.0307437
16798246	IPW /// SNRPN	0.00668756	0.83873	0.0162507		16762624	C12orf71	0.0126685	1.13089	0.0323943
16928510	SEZ6L	0.00670567	1.12158	0.0240136		17095916	MIR4670	0.0126688	1.10762	0.0382205
16817254	IL4R	0.0067098	0.859803	0.0180601		16876310	SRSF10	0.0126826	0.878552	0.0324685
16869034	HNRNPA1P10	0.00672264	0.944674	0.0932162		16864220	SCAF1	0.0126862	0.769632	0.0254751
16827170	NAE1	0.00672907	0.906981	0.0268802		16813459	FAM174B	0.012705	1.12221	0.0319861
16942687	---	0.00673404	1.16291	0.0181644		17095330	---	0.012719	0.577359	0.020986
16999475	FBN2	0.00673575	1.24127	0.0134897		16971859	LOC340017	0.0127552	1.10711	0.0374693
17014622	LOC100289495	0.00674045	0.881467	0.0216882		16942311	C3orf14	0.0127585	0.867202	0.0306906
16903356	ZEB2	0.00674806	1.23325	0.0148124		17051950	---	0.012771	1.10959	0.0359586
16703659	MAP3K8	0.00675222	1.45009	0.00989111		17045369	RALA	0.0127942	0.865461	0.030267
17112187	MIR421	0.00678338	1.29538	0.0119298		17095948	ZNF484	0.0127989	1.24983	0.0261258
16978793	PAPSS1	0.00680967	1.12244	0.024043		16696614	KIAA0040	0.0128098	1.32325	0.0244699
16753299	USP15	0.00683296	1.24746	0.0134897		17077687	LOC105375875	0.0128454	1.11162	0.0363626
16823477	ADCY9	0.00683529	1.15187	0.0195462		17122508	---	0.0128659	0.855156	0.029358
16653563	---	0.00684374	1.38769	0.0105468		16896040	---	0.0128685	1.26484	0.025609
16929118	INPP5J	0.00685421	1.25586	0.0131142		16834672	CD300LG	0.0129096	1.22159	0.0278908
17121982	---	0.00685714	1.09286	0.0338222		17005473	SCGN	0.012914	1.35302	0.022643
16805345	MCTP2	0.00686133	1.18278	0.0173568		16872052	HNRNPL	0.0129335	0.92976	0.0845379
17120122	---	0.00687376	1.12063	0.0240167		17053766	FABP5P3	0.0129344	0.866739	0.0308763
16844207	IKZF3	0.00688931	0.906653	0.0285364		16879952	---	0.0129784	0.889977	0.033144
16733216	FAM118B	0.00688969	1.15301	0.0181438		16980714	MIR3140	0.0129844	1.09844	0.0429438
16961919	DNAJC19	0.00689251	0.852156	0.0167676		17118329	---	0.0129913	1.27975	0.0256296
16933300	---	0.00689563	0.858565	0.0185129		16971371	---	0.013018	1.15338	0.030441
16696237	SELL	0.00690678	0.888569	0.0231441		16970384	IL21-AS1	0.0130204	0.885866	0.0328427
17009627	RN7SK	0.0069107	0.93859	0.0585615		16677925	LOC101927164	0.0130216	1.16686	0.0292961
16876009	ZNF671	0.00691205	0.850706	0.0175045		17006881	HSPA1A /// HSPA1B	0.0130339	0.869574	0.0307437
16755540	SLC25A3	0.00691841	1.33585	0.0111866		17124376	---	0.0130434	1.25646	0.0261373
17118878	---	0.00691841	1.33585	0.0111866		17094678	LINC01506	0.0130532	1.23119	0.0275838
16696013	CREG1	0.00693119	1.11285	0.0257955		17117575	---	0.0130652	0.796905	0.0271053
16781934	TRAV24	0.00693287	0.746194	0.0112414		17120812	---	0.0130764	1.10467	0.0394553
16798763	---	0.00694195	1.51394	0.00984916		16851933	GALNT1	0.0130929	0.854013	0.0300279
16806536	---	0.00694195	1.51394	0.00984916		16772982	---	0.0130948	0.826645	0.0282517
16840128	LOC284014	0.00694217	1.17982	0.0177122		16991940	---	0.0130968	1.14256	0.0317322
16686648	MKNK1	0.00694839	1.19617	0.0159105		17080557	---	0.0131184	1.23664	0.0275838
16747205	---	0.00695176	1.19962	0.0164791		16739223	---	0.0131186	1.13252	0.0322881
16835556	ABI3	0.00696148	1.14736	0.0198102		17065418	FAM90A9P	0.0131207	0.857786	0.029624
16997275	GCNT4	0.00696581	0.758875	0.0113014		17097724	PAPPA-AS2	0.0131298	1.08495	0.0489164
16836526	---	0.00697911	0.722716	0.0113049		16907038	---	0.0131319	0.533079	0.0202902
16798216	SNORD116-24	0.00698179	0.82798	0.0144158		17060049	DLX5	0.013141	0.91038	0.0433443
16711089	LARP4B	0.00698385	1.07388	0.0472732		17088230	RGS3	0.0131519	1.16347	0.030267
16949467	LPP	0.0069928	1.21322	0.0148967		16705810	UNC5B	0.0131562	0.77556	0.0263946
16899601	TRABD2A	0.00700197	0.781063	0.0119858		16893140	LOC105373962	0.0131593	0.83947	0.0282517
16903931	CYTIP	0.00702347	1.11687	0.0260628		16870978	ZNF675	0.0131817	1.33597	0.0229335
17087111	---	0.00704618	0.906185	0.0290563		16726652	VPS51	0.0131832	0.868748	0.0317162
16887014	GCA	0.00705471	1.30653	0.0118291		17063534	---	0.0132059	1.29257	0.0240332
16949617	SNAR-I	0.00705749	1.20976	0.0147825		16959866	---	0.0132179	1.24355	0.02671
17112349	CYSLTR1	0.00705976	0.860624	0.019115		16936360	HDAC10 /// MAPK12	0.0132207	0.84634	0.0293234
16863974	SNRNP70	0.00706292	0.924087	0.0365799		16953303	NME6	0.0132243	0.904198	0.0407397
16898903	PAIP2B	0.00707862	0.782424	0.0125054		16733589	---	0.0132289	0.805597	0.0271053
16894335	ADAM17	0.00712282	1.23838	0.0143713		17009526	LOC100505985	0.0132296	0.894231	0.0356953
17073142	LOC101928037	0.00713981	1.21391	0.0147246		17123648	---	0.0132479	1.53094	0.0222149
17119932	---	0.00714931	1.25701	0.0134676		16832319	WSB1	0.013254	1.18627	0.0271019
17009054	POLH	0.00714992	0.868154	0.0193542		16737487	---	0.0132742	1.13749	0.0319861
17124874	---	0.0071515	0.918354	0.0363667		17084067	---	0.0132835	1.21795	0.0278908
17066302	ATP6V1B2	0.00715342	1.18317	0.0163357		17096574	STX17-AS1	0.0132897	0.807688	0.0274041
16747917	FAM66C	0.00715583	1.20153	0.0155172		16935701	---	0.0133022	1.25904	0.027
16755327	LOC102723340	0.00715849	1.41426	0.0111119		17114745	SLITRK4	0.0133061	1.3215	0.0247305
16854754	CELF4	0.00716643	1.24583	0.0134897		16684461	COL16A1	0.0133395	1.15152	0.0309654
17004879	HIVEP1	0.00720445	0.861626	0.0194186		17107676	MAMLD1	0.0133846	1.30678	0.0253715
16948565	LINC00888	0.00720987	1.2689	0.0132276		17028007	---	0.0133897	0.884111	0.0319861
17052675	TRBJ2-3	0.00722502	0.784415	0.0120782		17043635	LOC105375148	0.0133931	1.18552	0.0285662
17041393	---	0.0072323	0.921493	0.0393301		16702431	ECHDC3	0.0134074	1.29441	0.0264231
16925023	SNORA80A	0.00724537	0.803839	0.0135466		16669212	TTF2	0.0134204	1.07743	0.0672299
16796412	LINC00341 /// SYNE3	0.00725431	0.899725	0.0259983		16860130	LOC102724427	0.0134204	1.20432	0.0284743
16679569	EFCAB2	0.00725975	1.18507	0.0170222		16775377	---	0.0134342	0.692041	0.0228445
17010737	---	0.00726358	1.18547	0.0172804		16995547	---	0.0134429	1.41757	0.0222149
16826243	ITFG1	0.00726993	1.11558	0.0262634		17015263	LOC102724096	0.013444	1.12474	0.0332507
16826537	---	0.00728038	0.807089	0.0140669		16873534	CCDC8	0.0134832	0.840034	0.0293187
17063461	HIPK2	0.0072959	1.12192	0.0245357		16933562	---	0.0134921	1.18163	0.028968
17013014	FLJ46906	0.00729994	1.18407	0.0176985		17007661	SNRPC	0.0134945	0.868453	0.0316649
17119502	---	0.00730857	0.835172	0.0163357		16896315	---	0.0134977	0.77931	0.0257377
17119538	---	0.00730857	0.835172	0.0163357		16751952	HOXC9	0.0135112	1.14325	0.0307437
17062426	---	0.00731966	0.836775	0.0169012		16701440	AHCTF1	0.0135154	1.31554	0.025346
16745467	LOC105369536	0.00732172	0.825496	0.0156911		16780047	LOC105370274	0.0135166	0.894262	0.0361342
16710271	BUB3	0.00732606	0.90376	0.0277856		16792894	TRIM9	0.0135332	1.23034	0.0271053
17092421	MPDZ	0.00733755	1.09322	0.0312954		17012281	TPD52L1	0.0135439	1.20429	0.0285662
17012844	---	0.00734481	1.14434	0.0214986		17004511	---	0.01355	0.800482	0.0275838
17024775	SYNE1	0.00734985	1.25607	0.0138631		17110372	LOC401585	0.0135595	0.87197	0.0316325
16898481	LOC101927701	0.00735088	1.10073	0.0300704		17028423	---	0.0135637	0.833041	0.0294628
17120798	---	0.007356	0.752415	0.0135466		17121556	---	0.0135772	1.18816	0.028617
16975301	---	0.0073614	0.869083	0.0198663		17098364	SCAI	0.0135891	0.814903	0.0280246
16824352	XYLT1	0.00737899	1.07139	0.0540325		16657349	---	0.0135956	1.47301	0.0222149
17056701	AOAH	0.00738035	1.26848	0.0132125		16825842	ZNF785	0.0136565	0.810093	0.0278908
16977709	---	0.00738438	1.37282	0.0112228		17057680	LOC105375272	0.0136595	0.884915	0.0334106
16798349	SNORD115-25	0.00738975	0.900272	0.0272011		16935130	JOSD1	0.0136595	1.17012	0.0294628
17004948	---	0.00739124	1.25374	0.0143713		17083144	SMARCA2	0.0136687	0.853155	0.0305446
16856023	LOC105372205	0.00739516	0.801045	0.0144152		17058499	TBL2	0.0136849	0.857709	0.0307437
17028113	---	0.0073965	1.08227	0.0380978		16902205	LOC105373580	0.0137276	0.867509	0.0307437
17050622	CAPZA2	0.007399	1.11057	0.0252821		17080364	LINC00536	0.0137296	0.874864	0.0315687
16669087	SLC22A15	0.00740221	1.45594	0.0105468		16803334	PSTPIP1	0.013796	0.848626	0.0293948
16672270	---	0.00740427	0.763453	0.011447		17033131	---	0.013799	1.28709	0.0253597
16812245	CTSH	0.00741082	1.1281	0.0231943		17037907	---	0.013799	1.28709	0.0253597
16781881	TRAV13-2	0.00741131	0.691542	0.0103318		16971382	DCLK2	0.0138123	0.797983	0.0272311
17052935	OR2A20P /// OR2A9P	0.00741437	0.823648	0.0150274		16982161	PDLIM3	0.0138246	1.17696	0.0293187
17127381	---	0.00742703	0.93414	0.0657979		17012692	TAAR8	0.0138331	1.09445	0.0438781
16661927	---	0.00745469	0.831052	0.0159664		16938515	LINC00693	0.0138551	0.830787	0.028968
17095461	ZCCHC6	0.00746923	1.21862	0.0156167		17082507	BOP1	0.0138611	0.855281	0.030267
16725091	OR4D10	0.00748251	0.891208	0.0258946		16829235	APRT	0.0138663	0.827195	0.0284743
16803807	IL16	0.00750425	0.866958	0.0201521		16690679	---	0.0138735	1.14652	0.0319861
16764894	KRT6B	0.00753148	0.765354	0.0122708		16850958	APCDD1	0.013876	1.37515	0.0233716
17041368	---	0.00753395	0.909037	0.0289088		17075534	---	0.0138783	1.15343	0.030267
16808094	LCMT2	0.00754285	0.861732	0.0194867		16931892	ANKRD62P1-PARP4P3	0.0138875	1.14841	0.0307437
16658619	ENO1-AS1	0.00757664	0.809542	0.0163104		16965116	HSP90AB2P	0.0139103	0.922365	0.0602526
16864393	ATF5 /// MIR4751	0.00758307	1.13277	0.0222944		16734902	OR51I1 /// OR51K1P	0.0139139	1.14118	0.0319861
16858546	ZNF439	0.00758309	0.836504	0.0163104		16850672	DLGAP1-AS5	0.0139206	1.08579	0.0458103
16872956	CEACAMP10	0.00759559	0.828534	0.0162507		17011212	---	0.0139292	1.19822	0.0285662
16756310	TCP11L2	0.00759822	0.911294	0.0292056		16678561	URB2	0.0139314	0.872496	0.0318094
16998162	MCTP1	0.00762122	1.24738	0.0142285		16933137	LOC100652894	0.0139372	1.13576	0.0319861
16902676	LOC105373615	0.0076231	0.87527	0.0213659		17121120	---	0.0139603	1.10038	0.0411139
16988798	LINC01183	0.007627	1.21418	0.0166988		16768901	LOC101928912	0.0139623	1.06914	0.085112
16782786	NOP9	0.00765838	1.07946	0.041098		16758624	DDX55	0.0139682	0.793449	0.0271053
16771468	---	0.00765951	0.422379	0.00909499		16760015	---	0.0139835	1.15203	0.0307437
17119996	---	0.007661	0.882132	0.0223151		17077500	---	0.0139984	1.20098	0.0285662
17107919	ZNF185	0.00766133	1.14726	0.0204702		16909257	SLC19A3	0.0140414	1.48707	0.0229335
16727207	---	0.00766841	0.519902	0.00943223		17113523	---	0.0140569	0.709621	0.0226639
16954567	CISH	0.00767971	0.600369	0.00982614		17099171	---	0.0140673	1.15715	0.030267
17066112	LOC105379299	0.00768019	1.13931	0.0215338		16886919	PSMD14	0.0140705	0.869116	0.0313543
16739247	---	0.00768086	0.827176	0.017411		16961872	CCDC39	0.0140866	1.13146	0.0321792
17017734	PPT2-EGFL8 /// PRRT1	0.0076924	1.15397	0.0201416		16921642	MIR99A	0.0140913	0.743302	0.0263946
16837180	CACNG1	0.0077056	1.12605	0.0240132		17002571	---	0.0141047	1.07615	0.0651043
16697095	NCF2	0.00772295	1.17108	0.0180584		16978346	DDIT4L	0.0141118	0.855358	0.030267
16981119	MARCH1	0.00772749	1.21035	0.0163357		16996472	LOC105378986	0.0141262	1.14539	0.030776
16666326	ST6GALNAC3	0.00773276	1.21668	0.0159263		16862767	LIPE-AS1	0.0141338	1.25579	0.0268362
17112735	BTK	0.00773505	1.09206	0.0340857		16954003	C3orf62	0.0141402	0.768656	0.027
16653369	---	0.00774873	1.4144	0.0112534		17125756	---	0.0141612	1.2601	0.02671
16653471	---	0.00774873	1.4144	0.0112534		16713598	LOC105378283	0.0141644	1.22407	0.0275838
16764706	POU6F1	0.00774933	0.81306	0.014911		16944568	FBXO40	0.0141859	1.17275	0.028968
16803469	DNAJA4	0.00776465	0.874583	0.0212673		16952414	CSRNP1	0.0141956	1.2151	0.0282517
17073420	ZNF707	0.00778647	1.16302	0.0194863		16834632	---	0.0141985	0.894572	0.0350998
16987914	WDR36	0.007799	0.936755	0.0658008		16869115	ZNF442	0.0142493	0.816627	0.0275838
16723507	NAT10	0.00781119	0.878512	0.0215378		16690922	---	0.01425	1.22423	0.0275838
16670920	SNX27	0.00782842	1.13655	0.0223545		16863239	BLOC1S3	0.0142557	0.885614	0.0328636
16830127	RPAIN	0.00784777	0.852543	0.0177209		17108594	---	0.0142568	0.827115	0.0285662
16966008	KLF3	0.00785225	0.887208	0.0246953		16724805	OR5AK2	0.0142593	1.115	0.0363626
17096631	MRPL50	0.00786476	0.807879	0.0144158		16866394	PLPP2	0.0142679	0.857025	0.0307437
17122238	---	0.00786695	1.12524	0.0236042		16857163	FSD1	0.014325	0.85005	0.0300555
16914823	LINC01272	0.00786701	1.23306	0.0153554		17056200	---	0.0143431	1.13657	0.0319861
16661687	EPB41	0.00791327	0.908344	0.0281053		16863063	CBLC	0.0143619	0.868796	0.0307437
17020602	---	0.00792004	0.881467	0.023482		17123646	---	0.0143977	1.5503	0.0222149
16887655	METAP1D	0.00792017	0.834066	0.0163104		16652009	---	0.0144051	1.20606	0.0282517
17083319	JAK2	0.0079226	1.30118	0.0122434		16652673	---	0.0144051	1.20606	0.0282517
17124698	---	0.00796997	0.83422	0.0163104		17007735	---	0.0144097	0.924721	0.0650407
16752305	CDK2	0.00798581	0.951406	0.120095		16936084	CDPF1	0.0144154	0.77367	0.0266726
17126218	---	0.00800964	0.829364	0.0160877		16987914	WDR36	0.0144193	0.864861	0.0307437
17122026	---	0.00801952	0.808302	0.0152403		17114585	FGF13	0.0144358	0.813706	0.0281778
16688153	ROR1-AS1	0.00802045	1.11848	0.0256608		16663199	FOXO6	0.0144424	0.859804	0.0305705
17114461	CT45A10 /// CT45A5	0.00802796	0.885352	0.0240136		16850538	---	0.0144471	0.844764	0.0293187
16861577	ZNF540 /// ZNF571-AS1 /// ZNF793	0.00805797	0.860684	0.0194863		17074036	ERICH1	0.0144555	1.18067	0.0293234
16758242	BCL7A	0.00806315	0.711504	0.0112414		16870865	LOC105372330	0.0144555	1.11015	0.0377643
17123832	---	0.00806631	1.39142	0.011202		16905521	TTC30A	0.0144836	0.824911	0.0282991
16763764	VDR	0.0080883	1.10874	0.0272357		16946301	TRIM42	0.0144914	1.15734	0.0307437
16688469	PTGER3	0.00811163	1.13471	0.0225649		16679567	---	0.0144956	0.82731	0.0281778
17021607	LOC105377888	0.00811401	1.12792	0.0244636		17021504	CNR1	0.014498	1.4455	0.0233716
16719644	BNIP3	0.00813003	0.829358	0.0163357		16653023	---	0.0145377	1.18986	0.0293614
17127629	---	0.00820471	0.806015	0.0145485		16876849	ASAP2	0.0145427	0.880839	0.0327485
17010876	ORC3	0.00823117	0.91875	0.0357629		16781053	LINC00346	0.0145457	0.814366	0.0279733
16971431	---	0.00824884	0.888295	0.0244701		16895954	CCDC121	0.014561	0.853918	0.0307437
16710654	---	0.00826155	0.847861	0.0185461		17117626	PPP2R5C	0.014568	0.763368	0.02671
16930530	---	0.00827896	1.30911	0.0120628		16894491	ROCK2	0.0145733	1.23768	0.0277064
16673713	FMO2	0.00828361	0.866477	0.0210456		16879189	LOC105374464	0.0145744	1.14075	0.0317322
17039191	---	0.00833981	0.896129	0.0270541		16703296	---	0.0145791	1.2281	0.0279587
16782100	TRAJ11	0.00834752	0.799554	0.0145179		16988361	TNFAIP8	0.0145806	1.14922	0.0309652
16971637	LOC105377499	0.00835908	1.51019	0.0112228		16991151	SYNPO	0.0146125	0.851826	0.0305446
17085595	FOXD4L3	0.00836397	1.17583	0.0194056		16793176	GCH1	0.0146186	0.857483	0.0305431
17048102	CFAP69	0.00837909	0.872309	0.0216398		16872783	LIPE	0.0146772	1.24534	0.0280246
16855562	---	0.00838459	0.810996	0.0159513		17071640	CTHRC1	0.0146835	1.18582	0.029339
16812503	---	0.00840261	0.773878	0.0137636		17015794	LOC105374943	0.0147004	0.908696	0.0417095
16975299	---	0.0084136	1.25126	0.0148124		17036088	---	0.0147169	0.885172	0.0339847
16963275	ZDHHC19	0.00842814	0.83862	0.0176157		17017198	---	0.0147205	2.00261	0.0222149
16876303	PNRC2	0.00843291	0.945941	0.0926924		17021105	LOC105377871	0.0147661	1.16053	0.0305431
16826501	---	0.00844502	1.18135	0.0185129		17056980	LOC105375247	0.0147944	0.877499	0.0323402
16914315	UBE2C	0.00844896	1.23017	0.0156889		17056966	MPLKIP	0.0147969	1.49145	0.0249604
16681142	TNFRSF25	0.00846283	0.877119	0.0223151		17098880	WDR34	0.0148289	0.844378	0.0303693
16878454	PLB1	0.00846791	1.12311	0.0246632		16877946	CENPA /// SLC35F6	0.0148479	1.13182	0.0328427
16699739	PARP1	0.00847991	0.909983	0.0294013		16924551	APP	0.0148512	1.22564	0.0279587
16854954	LOXHD1	0.00849349	1.10554	0.0283322		16923417	AGPAT3	0.0148739	0.882049	0.0331158
17009853	BAG2	0.00855026	0.826431	0.0163357		17024184	LOC105378020	0.0148808	1.06232	0.101532
16669324	LOC101929147	0.0085853	0.822849	0.0163104		16757508	---	0.0149025	1.1716	0.030267
16959596	DZIP1L	0.00858584	1.11656	0.0257955		16728220	MIR3164 /// TPCN2	0.0149109	1.14802	0.0307437
17090611	NTNG2	0.00860012	1.24698	0.0156219		16867432	PTPRS	0.014953	1.19138	0.030267
17122644	---	0.00865219	1.17007	0.0189083		16655463	---	0.0149542	1.35705	0.0254751
16765017	KRT2	0.00865315	1.13841	0.0230361		17021424	---	0.0149828	1.0895	0.0500436
16682930	EIF4G3	0.00865348	1.1128	0.0266414		16779059	CAB39L	0.0149871	1.21575	0.0292687
17056833	TRGV9	0.00865871	1.15576	0.0201471		16824572	GPRC5B	0.0149985	0.833763	0.029339
16924551	APP	0.00866705	1.07001	0.057229		16772350	LINC00508	0.0150219	1.18629	0.0294628
16780592	GPR183	0.00867192	0.871087	0.0214566		16651413	---	0.0150259	0.691629	0.0246285
17122660	---	0.00868502	1.1498	0.0212178		16995409	NUP155	0.0150288	0.866331	0.0309654
16835797	EME1	0.00872252	1.17652	0.0185129		17093227	AQP7	0.0150325	1.196	0.030267
16763853	SENP1	0.00872546	0.90523	0.0287373		17076721	---	0.0150443	1.17892	0.0301503
16927486	P2RX6 /// THAP7-AS1	0.00873084	0.850969	0.0195939		16820556	SNTB2	0.0150447	0.801764	0.0282517
16891546	LOC105376768 /// LOC440934	0.00873455	1.18054	0.0181644		16795447	LOC105370600	0.015048	1.11941	0.035075
17074029	TDRP	0.00874372	1.19887	0.0171987		16980470	NR3C2	0.0150763	1.19066	0.0291401
16781958	TRAV30	0.00874484	0.789263	0.0142528		16737482	LOC105376643	0.0151024	1.27637	0.0271019
17006649	LTA	0.00875963	0.85466	0.0180601		16991760	MIR3142	0.0151514	1.14375	0.0317162
17033327	---	0.00875963	0.85466	0.0180601		16782114	TRAJ4	0.0151625	0.798238	0.0279587
17040702	---	0.00875963	0.85466	0.0180601		17101214	XG	0.0151629	1.1713	0.030267
17096297	GAS2L1P2	0.00876074	1.18644	0.0178233		16674414	TDRD5	0.0152284	1.15079	0.030776
16833965	NR1D1 /// THRA	0.00876498	0.836156	0.0175045		16847711	GH1	0.0152432	0.832926	0.0292724
17078669	LOC105375929	0.00876628	0.861745	0.0203455		17123254	---	0.0152637	1.08725	0.0514406
16651309	---	0.00876946	0.707069	0.0120628		16761707	GRIN2B	0.0152724	0.706578	0.0244699
17101537	TLR8	0.00879082	1.21556	0.0169012		16958786	MGLL	0.0152844	0.908803	0.0470471
17058978	GSAP	0.00883048	1.13885	0.0228233		17086312	---	0.0153409	1.10938	0.0371801
16987244	---	0.00887231	1.19879	0.0178405		16655089	---	0.0153466	1.31108	0.0257377
16956954	---	0.00887501	0.835538	0.0175045		16772937	---	0.0153596	0.68061	0.0240813
16913447	LOC105372608	0.00887711	0.85887	0.0205154		17044927	---	0.0153925	1.26297	0.0275838
16855991	LOC105372198	0.00888057	1.15574	0.0191756		16869162	ZNF564	0.0154077	0.858149	0.0307323
17073078	DENND3	0.00888664	1.27622	0.0145828		16955793	---	0.01541	1.5243	0.0242295
16803103	MPI	0.00889592	0.838846	0.0175045		16660081	PADI6	0.0154108	1.14344	0.0316789
16965983	PTTG2	0.00891163	1.21976	0.0158767		16987902	TSLP	0.0154363	0.82758	0.0290547
16796094	ITPK1	0.00892429	1.10358	0.0284879		17005985	---	0.0154904	0.857186	0.030267
16853828	PPP4R1	0.00894267	1.12578	0.0244636		17027211	---	0.0154904	0.857186	0.030267
17083549	KDM4C	0.00894721	1.17124	0.0196369		16844634	---	0.015492	1.18476	0.0300657
17049312	PILRA	0.00894795	1.16796	0.0194186		16754711	MYF6	0.0155089	1.14466	0.0318212
17124840	---	0.00894963	0.788959	0.0141247		16942866	CADM2	0.0155347	1.31575	0.0259238
16735348	RIC3	0.00896506	0.851336	0.0187806		17121960	---	0.0155368	0.846311	0.0298845
17123146	---	0.00896764	0.831981	0.0178305		16801665	LOC105370844	0.0155482	1.09702	0.0475383
16874267	SLC6A16	0.00898267	0.844206	0.0176644		16981474	LOC101928288	0.0155772	0.88605	0.0338951
17073824	TONSL-AS1	0.00901262	1.13322	0.0235141		16771624	---	0.0155831	1.19831	0.028968
16656691	---	0.00901538	0.781864	0.0142631		16706006	---	0.0155913	1.10713	0.0403453
16747034	DYRK4	0.00901694	0.926531	0.0454906		17048563	PEG10	0.015598	0.827953	0.0294628
17123950	---	0.00901923	0.924236	0.0376375		16932217	CLTCL1	0.0156067	1.14587	0.0315705
17086496	DAPK1	0.00902386	1.18999	0.0189753		16891116	CDK5R2	0.0156073	0.801436	0.0284743
16749504	REP15	0.0090283	0.894963	0.0268802		17060983	POLR2J	0.0156107	0.739355	0.0259238
17041345	---	0.00904157	0.928982	0.0526013		16791197	TINF2	0.0156379	0.856254	0.0305705
16752715	LRP1	0.00904765	1.22287	0.0166055		16920169	B4GALT5	0.0156387	0.773418	0.0277064
17102855	---	0.00904853	0.906457	0.0289553		16962264	MAGEF1	0.0156663	0.811937	0.0296479
16928428	ADRBK2	0.0090674	1.18626	0.0178444		16697526	MIR4735	0.0156714	1.15936	0.0306228
16912401	MYLK2	0.00907173	0.855391	0.0201732		16745900	RPUSD4	0.0156887	0.843389	0.0298845
16773547	PDX1	0.0090869	1.19429	0.0177209		16960344	TM4SF18	0.0157066	0.905113	0.0445654
16945625	NEK11	0.00908912	0.831219	0.0171987		16981148	TRIM61	0.0157184	0.688969	0.0249051
17020617	LOC101928307	0.00909602	1.50005	0.0117136		17064220	ATP6V0E2-AS1	0.0157294	0.839941	0.0293287
16781970	TRAV36DV7	0.00911829	0.673721	0.011897		16807579	---	0.0157488	1.15444	0.030267
16742148	---	0.0091208	0.878025	0.0216398		16841130	RCVRN	0.0158065	0.897193	0.0371801
16781980	TRAV39	0.00914279	0.782611	0.0138623		16964673	---	0.0158283	0.856788	0.0307437
17122816	---	0.00914556	0.877687	0.0240136		17032433	---	0.0158464	0.835968	0.0302071
16835386	SNX11	0.00916108	1.1563	0.0210027		17123020	---	0.0158473	1.23547	0.0280246
16852218	C18orf25	0.0091656	0.937015	0.0621616		16983117	MIR4458 /// MIR4458HG	0.0158561	0.865521	0.0321037
16993302	ZFP2	0.00916739	0.804031	0.0155237		16811500	NPTN	0.01587	0.87781	0.0323943
16784256	STYX	0.00917635	0.861447	0.0208662		17022898	LOC105377959	0.0158787	1.17811	0.030267
16952455	---	0.00918115	0.909002	0.0322801		17093595	FANCG	0.015882	0.828912	0.0284743
16715785	---	0.00918655	1.09535	0.0324993		16954416	HYAL2	0.0158858	1.22896	0.0284743
17102424	MAGEB16	0.00920786	1.19051	0.0180601		17114435	DDX26B-AS1	0.0158873	0.841275	0.0301503
17007810	PPARD	0.00921415	0.916856	0.0346359		16671914	LMNA	0.0159012	0.874021	0.0326008
16917939	CST3	0.00922534	1.12637	0.0241604		16903160	---	0.0159079	0.823408	0.0279587
16823309	MEFV	0.00922927	1.24789	0.0154707		17046482	ZNF138	0.0159094	0.691763	0.0244699
16784333	SAMD4A	0.00926112	1.13408	0.0244117		16767225	LOC102724433	0.0159098	1.09748	0.0445735
17068606	---	0.0092729	1.29428	0.0143713		17080153	TMEM74	0.0159212	1.14975	0.0309076
16815108	C16orf59	0.00927642	1.14221	0.0216114		16927684	MIR130B	0.0159258	0.647046	0.0256296
16874327	NOSIP	0.0092843	0.831577	0.0169012		16921456	---	0.0159308	0.706303	0.0249051
17000858	DIAPH1	0.00930265	1.06598	0.0686461		17113463	LRCH2	0.0159387	1.36859	0.025797
16817839	SLX1A /// SLX1A-SULT1A3 /// SLX1B /// SLX1B-SULT1A4 /// SULT1A3 /// SULT1A4	0.00931936	1.11312	0.0270293		16883456	---	0.0159399	1.12667	0.0327485
17059955	PDK4	0.00935636	1.64114	0.0113014		16980156	LOC105377456	0.0159469	1.11217	0.0371801
16798222	SNORD116-25	0.00936513	0.851664	0.0193542		17124694	---	0.0159687	0.808528	0.0281778
16798755	ULK4P1 /// ULK4P2	0.00938133	1.30311	0.0143713		17002563	---	0.0159855	1.103	0.0409604
16813058	MFGE8	0.0094167	1.10637	0.0287317		16801428	GCOM1 /// MYZAP /// POLR2M	0.0159889	0.857281	0.0307437
16974121	AFAP1	0.0094283	0.845592	0.0188596		16987004	LOC101929380	0.0160079	1.15301	0.0310173
17034810	---	0.00943704	1.09399	0.0338098		16826681	LOC105371281	0.0160233	0.760171	0.02671
17039996	---	0.00943704	1.09399	0.0338098		16994385	CTD-2154B17.1	0.0160467	1.10405	0.0398231
17122442	---	0.0094409	0.880679	0.022082		16937050	EDEM1	0.0160633	0.823545	0.0284743
16967767	LOC105377272	0.00948811	0.86485	0.0221768		16656657	---	0.0160661	0.621928	0.0241005
16948150	---	0.00948901	0.890775	0.0262797		16741166	---	0.0160746	1.21183	0.028968
16786872	TMEM63C	0.00950028	1.13492	0.0235141		16892781	AGAP1	0.0160787	1.14482	0.0326406
16678680	ARV1	0.00950633	0.90408	0.0286973		16992836	CDHR2	0.0161071	1.19519	0.0294628
16720994	---	0.00951191	1.25856	0.0154487		17115994	---	0.0161113	1.1066	0.0442114
16842242	B9D1	0.00952613	1.13683	0.0244701		16931766	KLHDC7B	0.0161185	0.82188	0.028968
16938322	UBE2E2	0.00952705	1.11108	0.0273201		17006659	TNF	0.0161308	0.878583	0.0328427
16780358	UGGT2	0.00953434	1.3653	0.01371		17027794	---	0.0161308	0.878583	0.0328427
16806692	CHRFAM7A /// ULK4P1 /// ULK4P2 /// ULK4P3	0.00953822	1.27054	0.0148967		17030620	---	0.0161308	0.878583	0.0328427
16672946	FCRLA	0.00956183	0.832699	0.017411		17033337	---	0.0161308	0.878583	0.0328427
17008515	PRICKLE4	0.0095722	1.17087	0.0202474		17035418	---	0.0161308	0.878583	0.0328427
16809971	MYO1E	0.00957683	1.17357	0.0193542		17038117	---	0.0161308	0.878583	0.0328427
16704837	FAM21C	0.00959346	1.10126	0.0301688		17040712	---	0.0161308	0.878583	0.0328427
16869684	ADGRE2	0.0096245	1.3461	0.0137832		16983607	---	0.0161364	0.795934	0.0279587
17074725	DEFB130	0.00965132	1.07477	0.0545793		16657381	---	0.0161401	1.19745	0.0294628
17074768	DEFB130	0.00965132	1.07477	0.0545793		17075314	REEP4	0.016144	0.852493	0.0307437
16855734	LINC00305	0.00966686	1.11979	0.0264998		16930518	RBX1	0.0161627	0.870352	0.0327485
16659605	EFHD2	0.00967669	1.11185	0.0274421		16878098	ABHD1	0.0161718	0.831749	0.0293187
17001545	CSF1R	0.0096858	1.178	0.0192334		17101447	HCCS	0.0161936	0.829757	0.0298845
16775392	LINC00381	0.00971332	0.861486	0.0205179		16989547	---	0.0161973	0.902601	0.0413083
16850394	LOC105379280	0.00976003	1.26603	0.0152132		17073485	LOC642574	0.0162166	1.1462	0.0307437
16724235	GYLTL1B	0.00977145	0.804613	0.0155237		16811847	IMP3	0.0162269	0.867461	0.0318094
17097941	TRAF1	0.00977158	0.793664	0.0155237		17052542	MGAM2	0.0162355	1.11778	0.0385021
16975890	OCIAD2	0.00977638	0.776278	0.0140669		16977162	LOC105377294	0.0162398	1.10372	0.0423817
16920864	LOC105372697	0.00978782	1.14594	0.0211951		16920121	ZNFX1	0.0162419	0.821402	0.028528
16796607	SETD3	0.00980351	1.07544	0.0513466		16946966	MED12L	0.0162533	0.94389	0.142024
16815791	ATF7IP2	0.00980443	0.901389	0.0284187		16806279	HERC2	0.0162642	0.935623	0.0903044
16714531	---	0.00980461	0.87527	0.0227056		16915206	---	0.01628	1.10875	0.0390231
16662453	AGO1	0.00981704	1.108	0.028114		16703707	LOC105376480	0.0162801	1.07532	0.0686707
16771430	CAMKK2	0.00982359	1.11675	0.0266383		16992461	---	0.0162828	0.826823	0.0297363
16784760	DACT1	0.00983284	0.754678	0.0154487		16883255	VWA3B	0.0163212	1.12422	0.0334323
16832403	---	0.00983494	1.2396	0.0163104		16679785	OR2M1P	0.0163555	0.860478	0.0305705
16913806	PLCG1 /// RPL23AP81	0.00986281	0.80834	0.0163104		16780004	LINC00331	0.0163597	0.873797	0.0321792
16943983	GTPBP8	0.00987143	0.917626	0.0360279		16655035	---	0.0164028	1.54094	0.0259238
16768401	KERA	0.00988302	1.09233	0.0355977		16931813	---	0.0164052	1.15489	0.0307437
16801209	---	0.00990451	1.12355	0.0257331		16791280	DHRS1	0.0164312	0.808405	0.0283536
17027784	---	0.00990946	0.839395	0.0178338		16755094	LOC102724933	0.0164734	1.25313	0.0277064
16874512	SNAR-D	0.00993235	1.87527	0.0112639		16991710	---	0.0164911	1.32332	0.0260331
16877328	---	0.00995915	1.21338	0.0193889		16653697	---	0.0165093	0.662425	0.0240332
17069718	LOC102724708	0.00996047	1.18909	0.0185461		16805555	LRRC28	0.0165597	0.85987	0.0307437
17009235	---	0.00996467	0.784222	0.0152252		16825474	LOC105369257 /// LOC388242 /// LOC613038	0.0165868	0.856408	0.0307437
16893663	---	0.00997135	1.23542	0.0163357		17125286	---	0.0166064	1.3999	0.0260331
17055390	DGKB	0.00997194	1.12102	0.0258978		16955048	RFT1	0.0166224	0.851879	0.030267
17015919	KIF13A	0.00999462	1.21195	0.0174619		17093038	MOB3B	0.0166226	1.18477	0.028968
16653491	---	0.00999473	1.32262	0.0140669		16834441	VPS25	0.0166587	0.845379	0.030267
16989881	UBE2D2	0.00999774	0.899628	0.0273963		17109272	FIGF /// PIR	0.016669	0.831835	0.029624
16855244	MIR4320	0.0100095	0.86972	0.0223761		16690029	---	0.0166889	0.877889	0.0328427
17106051	MID2	0.0100164	0.852044	0.0190235		16699021	INTS7	0.0166893	0.833862	0.0285662
17108843	LOC389906 /// LOC441528	0.0100388	0.854061	0.019277		17023807	HMGA1P7	0.0167071	1.19878	0.028968
16939510	ZNF619	0.0100469	0.900931	0.028541		16688794	---	0.0167317	1.1422	0.032449
16836021	ABCC3	0.0100516	1.17713	0.019115		17072144	DEPTOR	0.0167367	1.20911	0.0290547
17003876	MIR340	0.0100568	1.39304	0.0132276		16838937	ASPSCR1	0.0167739	0.779586	0.0279587
16807324	BMF	0.0100586	1.15661	0.0216398		16886734	---	0.0167827	1.21083	0.0297882
17069479	---	0.0100611	0.566739	0.011447		16846259	HOXB3 /// HOXB6	0.0168035	0.80841	0.028968
16866285	---	0.0100635	0.813548	0.0161222		16771314	---	0.0168138	0.515045	0.0240009
17000854	TAF7	0.0100639	0.898901	0.0270297		16691619	LINC00622	0.0168252	0.653754	0.023482
16849274	ST6GALNAC2	0.010064	1.23677	0.0163357		17121752	---	0.0168645	1.1281	0.0335614
16864201	PRR12	0.0100695	0.871141	0.022017		16920013	---	0.0168905	1.56025	0.0266082
16656071	---	0.0100835	1.53271	0.0122708		16737048	---	0.0169166	1.09739	0.0444276
16915044	FAM209A /// RTFDC1	0.0101089	1.13925	0.0234965		17080497	LOC101927513	0.0169251	0.921624	0.0570694
16873999	---	0.010116	0.829	0.017172		17097369	ZNF883	0.0169276	1.28223	0.0278706
17063779	TRBV5-6	0.0101616	0.732968	0.0135501		16688796	---	0.0169476	1.35129	0.02671
16968314	PRDM8	0.0101892	0.831673	0.0179642		17120868	---	0.016949	0.848955	0.030267
17098395	PPP6C	0.0102135	0.925697	0.04751		16656035	---	0.0169596	1.3932	0.025797
17082898	COMMD5 /// ZNF250	0.0102328	0.884609	0.0244117		16940398	---	0.016968	1.16327	0.0307437
17006316	---	0.0102413	0.782002	0.0153551		16655603	---	0.0169702	1.59417	0.0241871
17055697	CDCA7L	0.0102439	0.809324	0.0158714		16896710	SOS1	0.0169779	0.8102	0.0291988
17103525	CCDC120	0.0102979	0.863546	0.0208636		17018299	IP6K3	0.0169886	1.18541	0.0302338
16675673	CAMSAP2	0.0102999	0.891578	0.0257913		16866379	LOC101927097 /// LOC105369157	0.0169987	0.844108	0.0307437
16827123	CMTM4	0.0103238	1.24623	0.0163104		17054145	LINC01022	0.0170077	0.78607	0.0278801
16769194	---	0.0103389	1.35904	0.0135466		17115891	AKAP17A /// ASMT	0.0170264	0.861761	0.0319861
16788741	MIR654	0.0103414	1.3216	0.0143713		16666045	HHLA3	0.0170329	0.892386	0.0378085
16886044	DARS-AS1	0.0103457	1.14551	0.0225649		16865522	KIR2DS4	0.0170339	1.23473	0.0284743
17010760	NT5E	0.0103496	0.744277	0.0131782		16889699	---	0.0170465	1.40931	0.0259944
16725511	PGA3 /// PGA4 /// PGA5	0.0103516	1.17331	0.0190235		17125734	---	0.0170522	1.22544	0.0284743
16662338	ZMYM1	0.0103694	0.876775	0.0226		16742454	PAK1	0.0170641	0.794737	0.0279733
16846218	HOXB2	0.0103817	0.828585	0.0175634		16756865	ANKRD13A	0.0170652	0.861779	0.0309654
16743517	MAML2	0.010406	0.877382	0.0234292		16739132	FADS1	0.0170892	0.814265	0.0292724
16965017	USP17L22 /// USP17L9P	0.0104104	1.18708	0.0192717		16754729	ACSS3	0.017101	1.26743	0.0282517
16800322	ELL3 /// HYPK /// SERF2	0.0104108	0.922181	0.0424395		16963665	---	0.0171218	1.25385	0.0278908
16786607	JDP2	0.0104115	1.20315	0.0180601		16778879	---	0.017129	1.21547	0.028968
17092747	---	0.0104188	0.814062	0.0168439		16795457	LOC105370603	0.0171356	0.773327	0.0280246
17012713	LINC00326	0.0104291	0.881202	0.0245886		16942055	LOC101929159	0.0171471	1.14167	0.0319861
16738400	APLNR	0.0104417	1.15653	0.0210456		16841553	---	0.0171507	1.17721	0.0305705
17020019	MCM3	0.0104613	0.876302	0.022453		16889160	PLCL1	0.0171608	0.827597	0.0302986
16862375	CYP2B7P	0.0104674	0.756022	0.0145179		16883530	---	0.0172009	1.10922	0.0388533
16914449	CD40	0.0104729	0.71415	0.0133609		17083625	LINC00583	0.0172015	1.12156	0.0357077
16827677	---	0.0104848	0.855022	0.0204783		16893349	SNED1	0.0172068	1.12947	0.0342565
17056734	AOAH-IT1	0.0105108	1.4359	0.0135466		16881918	---	0.017236	0.842226	0.0307437
16986913	VCAN	0.0105198	1.3034	0.0157622		17121068	---	0.0172782	1.10659	0.0392025
16869935	OR10H1	0.0105273	0.86527	0.022017		16666112	LOC105378797	0.0173237	1.09794	0.0455331
16924327	C21orf91	0.010553	0.891812	0.0257955		16818877	---	0.0173291	1.13531	0.0338951
16807337	C15orf56	0.010575	1.18593	0.0198002		17001446	---	0.017355	1.18626	0.030267
16706350	C10orf11	0.0105785	1.17303	0.0201521		16689246	LINC01364	0.0173566	0.853208	0.0305705
16820439	ZFP90	0.0105892	0.890069	0.0256754		16906440	OSGEPL1	0.0173654	0.817199	0.0292724
16653015	---	0.0105916	1.28194	0.0156167		16839510	---	0.0173903	1.17072	0.0307437
16881512	---	0.0105975	0.774731	0.0157622		16823255	HCFC1R1	0.0174445	0.815321	0.0293187
17123988	---	0.0106123	0.81034	0.0167448		16801669	LOC102724790	0.0174681	1.08771	0.0518366
17125612	---	0.0106298	0.828311	0.0177209		16684331	SDC3	0.017473	0.850504	0.0307437
16999584	---	0.0106502	0.813191	0.0169012		16678611	COG2	0.0174795	0.835841	0.0302142
16792954	NID2	0.0106623	1.13791	0.0235141		16724785	OR8K1	0.0174953	1.14747	0.0321037
17056825	TRGJP1	0.0106645	1.14286	0.0225832		17026211	---	0.0175005	0.842594	0.030267
16725252	MS4A1	0.0106667	0.71343	0.0134145		17030404	---	0.0175005	0.842594	0.030267
16688386	DEPDC1	0.0106704	0.879432	0.0237929		17033109	---	0.0175005	0.842594	0.030267
16650747	---	0.0106793	0.62625	0.0121857		17035229	---	0.0175005	0.842594	0.030267
16798244	IPW /// SNRPN	0.0106816	0.771741	0.0152403		17037888	---	0.0175005	0.842594	0.030267
16652125	---	0.0106943	0.666044	0.01237		17040602	---	0.0175005	0.842594	0.030267
16868912	RAB3D	0.010695	1.27015	0.0159513		16684391	NKAIN1	0.0175329	1.14933	0.0327485
16769690	CMKLR1	0.0107028	1.20831	0.0179642		17070177	ZFHX4	0.0175367	0.844413	0.0305705
16679064	ACTN2	0.0107032	0.801477	0.0170222		16821396	MIR3182	0.0175387	0.668885	0.0254751
16734826	---	0.0107064	0.907289	0.0315704		17094233	KGFLP2	0.0175425	0.721359	0.027
16875881	ZNF667	0.0107134	1.12031	0.0264378		16674841	---	0.0175434	1.1818	0.0302338
17019056	TREM1	0.010718	1.43729	0.0135466		16842171	TBC1D28	0.0175601	1.23221	0.0284743
17121104	---	0.0107196	1.18817	0.0191964		16650225	---	0.0175692	1.24384	0.0282517
16655391	---	0.0107715	0.559552	0.0117879		17052289	JHDM1D-AS1	0.0175933	1.24444	0.028528
17071969	LOC100132813	0.0107742	1.15252	0.0221633		16663533	---	0.0176065	1.14052	0.0327668
16686863	SPATA6	0.0107904	1.15322	0.0216114		16900041	LOC101928347	0.0176074	1.1543	0.0319861
16718687	C10orf82	0.0108	1.22634	0.0173599		16852132	SETBP1	0.0176105	1.15813	0.0309076
16820398	SLC7A6	0.0108146	0.861991	0.0215338		16658159	ARHGEF16	0.0176183	0.849726	0.0307437
16792510	DNAAF2	0.0108449	0.842465	0.0193542		17077423	---	0.0176361	1.12144	0.0359586
16685702	SNORA55	0.0108605	1.20985	0.0178233		16852349	ELAC1	0.0176364	0.808147	0.028968
17066845	CHMP7	0.0108605	0.809193	0.0163104		17122654	---	0.0176489	0.77627	0.0277064
17021407	SNHG5	0.0108844	0.844824	0.0197958		17124998	---	0.0176514	1.07845	0.0642641
16972710	WWC2	0.0108879	1.16515	0.0212178		16749626	---	0.0176936	0.926196	0.0777531
17009032	POLR1C	0.010893	0.870128	0.0215378		17034524	---	0.0177068	1.14338	0.0322245
16969686	CCDC109B	0.0108978	0.884827	0.0253394		16653599	---	0.017708	1.76366	0.0249604
16819244	MT1CP	0.0108987	1.27157	0.016127		16727207	---	0.0177365	0.756957	0.0277064
17084936	ZCCHC7	0.0109076	0.879588	0.0241057		16938151	---	0.0177457	1.41667	0.027
16782108	TRAJ7	0.0109436	0.769889	0.0152403		17006743	SNORA38	0.0177593	0.785869	0.0279587
16697221	TRMT1L	0.0109475	0.893875	0.0266563		16827677	---	0.0177607	0.62378	0.024948
16818980	RBL2	0.0109748	0.911807	0.0319683		17123716	---	0.0177899	0.748399	0.0275838
16949274	---	0.0109885	0.890508	0.0264378		17087679	LOC105376189	0.0178066	0.847873	0.0302338
16745139	---	0.0109969	0.806232	0.0172448		16952557	VIPR1-AS1	0.0178084	1.20082	0.0297363
17090911	LOC101928384	0.0110116	1.12541	0.0263673		16650953	---	0.0178091	1.19991	0.0297363
17049983	LOC101927870	0.011012	0.916856	0.0376088		16862368	CYP2G1P	0.0178493	0.843459	0.0308542
17080342	TRPS1	0.0110278	1.22745	0.0175045		16975947	ERVMER34-1	0.017855	1.17083	0.0305431
17033617	---	0.011041	0.89199	0.0267902		16974368	---	0.0178874	1.18334	0.030267
16654149	---	0.0110417	0.588154	0.0132627		16730259	LOC105369436	0.0178939	1.08025	0.066335
17124374	---	0.0110515	0.845787	0.0194867		16939637	VIPR1	0.0179188	1.20961	0.0293187
17123244	---	0.0111172	0.870598	0.0223277		16812897	KLHL25	0.0179998	0.774577	0.0280246
16790803	SLC22A17	0.0111196	0.903106	0.0305347		17001879	SLC36A2	0.0180195	0.896608	0.0398516
16798250	IPW /// SNRPN	0.0111224	0.868916	0.0223761		16967135	---	0.0180526	1.32566	0.0271019
17048574	---	0.0111251	0.846113	0.0194624		16900293	ANKRD36C	0.0180569	1.20496	0.029624
16651613	---	0.0111267	0.788273	0.0157622		16929610	RASD2	0.0180594	1.22988	0.0281778
16971415	---	0.0111305	0.671498	0.0133718		16848318	ABCA5	0.0180673	1.35701	0.0271019
17062804	MIR96	0.0111389	0.890851	0.0269613		16763902	OR10AD1	0.0180812	1.20341	0.029624
16989613	LOC100130172	0.0111635	1.16688	0.0200756		17021585	UBE2J1	0.0180898	0.897821	0.0397926
16815579	NUDT16L1	0.011177	1.10029	0.0332194		16818666	---	0.0181078	0.691451	0.0268362
17092003	VLDLR-AS1	0.0111788	0.846341	0.0202968		16988228	ARL14EPL	0.0181176	1.08046	0.0666354
16806145	ATP10A	0.0111805	0.873095	0.0222393		16919347	LOC105372622	0.0181232	1.13811	0.0327485
16715316	DNAJB12	0.0111995	1.08283	0.0461022		16655869	---	0.0181383	1.25455	0.0281465
16962491	---	0.011211	1.24413	0.017246		16818842	CYLD	0.0181393	0.85975	0.0309076
16908617	---	0.0112141	0.711274	0.0143619		17037746	---	0.0181501	0.816079	0.0294628
17094876	ZFAND5	0.0112223	1.09585	0.0348913		16941932	LOC105377096	0.018185	1.13787	0.0330621
17122390	---	0.0112241	0.792192	0.0162507		16693512	---	0.0181901	0.906664	0.0435737
16654807	---	0.011238	0.625094	0.0124433		17051578	---	0.0182045	0.683228	0.0265602
16676562	SRGAP2 /// SRGAP2B /// SRGAP2D	0.011238	1.24701	0.0166055		16902390	---	0.0182082	0.794352	0.0284743
17007417	HCG25	0.0112422	0.921634	0.03872		17124614	---	0.0182095	0.815915	0.028968
17028466	---	0.0112422	0.921634	0.03872		17025177	DYNLT1	0.0182106	0.868333	0.0319861
17031280	---	0.0112422	0.921634	0.03872		17121144	---	0.0182796	0.774276	0.0279587
17033765	---	0.0112422	0.921634	0.03872		16689650	FAM69A	0.0182884	0.801848	0.029358
17036029	---	0.0112422	0.921634	0.03872		16698984	NEK2	0.0183083	1.08044	0.0591854
17041336	---	0.0112422	0.921634	0.03872		16917397	---	0.0183094	0.916934	0.0568279
17052083	AKR1D1	0.0112431	0.87994	0.0238013		16799231	SPRED1	0.0183162	0.704192	0.02671
16746450	B3GAT1	0.0112549	1.20664	0.0178627		17004696	LOC105374913	0.0183341	1.12542	0.0365132
17047652	PTPN12	0.0112784	1.19685	0.0180601		17002664	---	0.0183562	0.940383	0.109394
16722570	GTF2H1	0.011292	0.938163	0.0711934		16780509	DOCK9	0.0183579	1.23643	0.0282517
16996234	PLPP1	0.0113057	0.819617	0.0178073		16823433	CREBBP	0.0183678	1.10124	0.0468914
16874922	SIGLEC14	0.0113253	1.17973	0.0202474		16656521	---	0.0183733	1.73032	0.024948
16781573	ANG /// RNASE4	0.0113324	1.23203	0.0174619		16956258	---	0.0183797	1.13638	0.0321331
16907044	SATB2	0.0114037	1.20403	0.0188025		16842286	LOC105371576	0.0183887	0.887279	0.0345803
16790493	SLC7A7	0.0114186	1.19127	0.0190439		16657435	---	0.0184041	1.1809	0.0306906
17108694	CRLF2	0.0114402	1.1382	0.024357		16856762	---	0.0184089	0.752582	0.0279587
17044442	SNX10	0.0114571	1.32274	0.0153551		17006863	HSPA1A /// HSPA1B	0.0184704	0.88489	0.0368169
16819813	LINC00920	0.0114696	0.83166	0.0185461		16715529	USP54	0.0184715	0.838103	0.0305705
17119482	---	0.0114778	0.842348	0.0194056		16664281	NSUN4	0.0184843	1.16158	0.0315705
16845222	EZH1	0.0115027	0.938893	0.0654358		16840769	LOC284023	0.0184996	0.834706	0.0305431
17122114	---	0.0115136	0.804253	0.0176644		16795128	TMED8	0.0185006	0.836217	0.0305431
16989534	SMAD5	0.0115267	1.15525	0.022453		16830839	CNTROB	0.0185134	0.875622	0.0342565
17091030	FCN2	0.0115377	1.33412	0.0155237		16735332	NLRP10	0.0185252	1.17371	0.0305866
16841941	SREBF1	0.0115538	0.800607	0.0165063		17046313	LOC100653233	0.0185593	1.20975	0.028968
16723668	---	0.0115615	0.8382	0.0188596		17016663	OR2B3	0.0185704	0.912458	0.048542
16715219	LOC102723377	0.0115674	1.10408	0.0309568		17026508	---	0.0185704	0.912458	0.048542
16961681	NAALADL2-AS1	0.0115779	0.887905	0.0266383		17028567	---	0.0185704	0.912458	0.048542
16958786	MGLL	0.0115902	1.10376	0.0298429		17031348	---	0.0185704	0.912458	0.048542
16876116	A1BG	0.0116107	1.21322	0.0180601		17033804	---	0.0185704	0.912458	0.048542
17104186	LINC01420	0.0116147	0.836446	0.0186586		17038853	---	0.0185704	0.912458	0.048542
16763928	---	0.0116281	1.24575	0.0174619		17041468	---	0.0185704	0.912458	0.048542
16683607	RCAN3AS	0.0116286	0.82589	0.0177122		16950838	---	0.0185863	0.76001	0.0279733
16781908	TRAV18 /// TRAV20	0.0116287	0.833957	0.0186586		16996054	LOC100287592	0.0186122	1.16157	0.0310173
17121528	---	0.01163	0.861413	0.0212673		16965756	LOC105374549	0.0186169	0.896857	0.03898
17087034	MFSD14B	0.0116458	1.12314	0.02585		16965072	---	0.0186345	1.22457	0.0282684
16650321	---	0.0116534	1.14856	0.0237287		17070307	FABP5	0.0186388	0.802387	0.0280246
16658414	TAS1R1	0.0116594	1.11978	0.0268108		16836896	ACE	0.0186513	0.738654	0.0275838
16732026	---	0.0116608	0.82176	0.0186431		17120430	---	0.0186707	0.934891	0.0917634
16906235	LOC105373782	0.0116674	0.889987	0.026357		16790127	LOC100507513	0.0186722	1.05349	0.150122
16696657	RFWD2	0.0116768	1.1823	0.0198063		16774162	NHLRC3	0.0186953	0.889101	0.0376887
16866081	ZIK1	0.0116994	0.834181	0.0186586		17069879	LOC101926892	0.0187182	0.862347	0.0313543
16786738	GPATCH2L	0.0117531	1.06787	0.0598198		16741437	---	0.0187275	0.823774	0.0292724
16829602	DPH1 /// OVCA2	0.011767	0.943242	0.0843046		16826631	LOC105371279	0.0187349	1.07658	0.0704005
16759652	ZNF140	0.0117961	0.74601	0.0147825		16798659	LOC727808	0.0187441	0.814773	0.0297363
16784498	PELI2	0.0118294	1.1364	0.0244701		16653773	---	0.0187513	1.39647	0.027
16753585	---	0.0118502	1.19313	0.0193542		16734163	CHID1	0.0187583	0.828871	0.0301503
16889411	CFLAR	0.0118587	1.11871	0.0268802		16754910	---	0.0187694	1.12474	0.0363626
16927409	LOC101928891	0.0118659	1.16926	0.0212485		17024418	SF3B5	0.0187954	0.919913	0.0636364
16927775	IGLV3-32	0.0118691	0.783684	0.0168364		16995461	GDNF	0.0188026	0.868851	0.0319861
16887810	ZAK	0.011873	1.20648	0.0184394		16897112	PREPL	0.0188098	0.890421	0.0400745
17121622	---	0.0118731	1.16318	0.0213179		17051536	CPA2	0.0188213	0.793631	0.0284743
16790468	---	0.0118803	0.791137	0.0164656		16661995	CCDC28B	0.0188363	0.868056	0.032588
16732037	CXCR5	0.0119036	0.681019	0.0138506		17026176	---	0.0188406	0.814028	0.028968
16863589	C5AR1	0.0119238	1.19816	0.0188596		17030260	---	0.0188406	0.814028	0.028968
16655359	---	0.0119266	0.697635	0.0141987		16909165	IRS1	0.0188424	0.730158	0.0279587
17008534	PRICKLE4 /// TOMM6	0.011939	0.905704	0.029978		16704040	LOC100129055	0.0188575	1.13868	0.0327668
17097388	FKBP15	0.0119557	1.09219	0.0346997		16890122	IDH1-AS1	0.0188587	0.88345	0.034678
16761877	EPS8	0.0119697	1.2526	0.017246		16762370	CASC1	0.0188921	1.12642	0.0349485
16728857	PLEKHB1	0.0119952	0.846185	0.0205154		16902404	LOC105373600	0.0188944	0.900152	0.0403348
17038687	---	0.0120053	1.14151	0.0216114		16997279	LINC01336	0.0189096	1.19555	0.0302658
16704320	RASSF4	0.0120176	1.28628	0.0163104		17011028	---	0.0189107	1.15123	0.0319861
17049149	CNPY4	0.0120302	0.875337	0.0225809		17124164	---	0.0189299	1.11296	0.0392878
17065343	---	0.0120317	1.10972	0.0295801		17078424	---	0.0189351	1.23468	0.0285007
16992387	---	0.0120361	1.19357	0.0194624		16965311	---	0.0189724	0.793147	0.0281778
16683551	IFNLR1	0.0120445	1.176	0.0203387		16991149	NDST1	0.0189834	1.18242	0.0317322
16836564	CLTC	0.0120735	1.08784	0.0394438		16946439	RNF7	0.0189875	0.866409	0.0345569
16671791	MSTO1	0.0120791	0.819756	0.0184716		16896708	LOC375196	0.019005	1.16505	0.0307437
17069412	YTHDF3	0.0120812	1.11678	0.0272357		16676008	PPP1R12B	0.0190134	1.19591	0.0305705
16833433	CCL4L1	0.0120818	1.39351	0.0152403		17025697	MIR3939	0.0190257	0.871933	0.0328427
16712046	NMT2	0.0120903	0.849024	0.0205179		17005276	SOX4	0.0190434	0.7727	0.0281778
16651253	---	0.0120929	1.36433	0.0155237		17079986	LOC105375687	0.0190453	1.15399	0.0321037
17123150	---	0.0121065	0.834342	0.0193916		16993235	N4BP3	0.0190548	0.813244	0.0292724
16676988	HSD11B1	0.0121071	0.861049	0.0210456		17040321	---	0.0190686	1.17891	0.0302496
16895101	LOC105374323	0.0121149	1.14113	0.0247577		17127285	---	0.0190787	1.10537	0.0405282
16899680	---	0.0121229	0.877268	0.0252821		16844177	---	0.0190878	1.10192	0.0444507
16886151	---	0.0121368	1.35689	0.0155237		16982839	LOC105374627	0.0190969	1.11657	0.0378085
16922031	---	0.0121508	1.25338	0.0169012		16979956	ELF2	0.0191092	1.11016	0.0363626
17122058	---	0.0121612	0.932171	0.048957		16653013	---	0.0191137	0.584036	0.0256296
16901411	LOC285000	0.0121791	1.16692	0.021181		17065362	---	0.0191173	0.839185	0.030267
16694928	FCRL3	0.0121915	0.842498	0.0195462		17058303	---	0.0191187	1.25578	0.0284743
16698618	SRGAP2	0.0122143	1.13231	0.0252545		16955822	ADAMTS9	0.0191315	0.782493	0.0284743
16735988	LOC101928132	0.0122179	1.24216	0.0176239		16760136	---	0.0191625	1.12003	0.0370388
16945664	NUDT16	0.0122238	1.20708	0.0186431		16766923	PPM1H	0.0191932	0.776593	0.0279733
16653963	---	0.0122242	1.31648	0.0159513		16846742	---	0.0192106	1.12314	0.0378085
16694529	CCT3	0.0122412	0.895011	0.0272011		16799492	INAFM2	0.0192126	0.73492	0.0277064
16891555	SGPP2	0.0122475	0.853785	0.0203387		17004450	LOC100507506	0.0192183	1.22268	0.0294628
16871966	MAP4K1	0.0122495	0.873438	0.0227056		16763293	---	0.0192219	0.83554	0.030267
16775588	SLAIN1	0.0122507	0.826864	0.018556		16874778	KLK14	0.0192311	1.14014	0.033144
16695216	IGSF9	0.0122573	1.13267	0.0248897		16885484	LOC105373612	0.0192344	1.10325	0.0465575
16810958	---	0.0122577	0.912214	0.032035		17000040	CDKL3	0.0192499	0.816282	0.0295536
16964027	FGFR3	0.0122648	1.19904	0.0194624		16654025	---	0.0192517	0.475873	0.0249604
16927261	TMEM191B	0.0122656	1.18196	0.0200756		16655631	---	0.0192547	1.42839	0.0257377
16952152	LRRFIP2	0.0123317	1.17111	0.0212485		16692448	PPIAL4A	0.0192592	0.71245	0.0271053
16901456	RGPD3	0.0123446	0.834921	0.0177122		17119024	---	0.0192697	0.721494	0.0285662
16966911	TMEM165	0.0123446	1.1493	0.0231943		17060989	RASA4 /// RASA4B	0.0192906	0.87507	0.0342565
16774789	SETDB2	0.0123676	0.913655	0.0357093		16794297	COX16 /// SYNJ2BP /// SYNJ2BP-COX16	0.019311	0.882263	0.0351776
16791555	LOC105370425	0.0123696	0.855931	0.0215338		17121538	---	0.0193466	1.15796	0.0313603
16865244	TSEN34	0.0123731	0.906283	0.0302879		16933665	---	0.0193476	1.15008	0.0321037
16868187	MYO1F	0.0123889	1.17809	0.0204172		17016494	HIST1H4J /// HIST1H4K	0.019357	0.848837	0.0307437
16744698	---	0.0124135	1.13992	0.0242682		16862186	---	0.0193764	1.08499	0.0568279
16944304	LOC105374058	0.0124252	1.1935	0.0198063		16711413	LOC105376382	0.0193834	0.90077	0.0407266
16857567	ARHGEF18	0.0124346	0.906639	0.0315436		17125754	---	0.019421	1.16517	0.0309076
16709783	LINC00867	0.0124559	1.16124	0.0216451		16966582	SLC10A4	0.0194431	1.10871	0.0401925
16726598	---	0.0124602	0.866564	0.0231441		16872767	PAFAH1B3	0.0194678	0.821197	0.0298845
16782076	TRAJ24	0.0124615	0.795929	0.0175045		17098535	PTRH1	0.0194769	0.919684	0.0651797
17037192	---	0.0124723	1.0687	0.0622482		17125288	---	0.0194805	1.38804	0.0277064
16836409	OR4D1	0.0124735	0.860916	0.0229991		16837377	---	0.0194853	1.13146	0.0340917
17088296	LOC105376223	0.0124831	0.885754	0.0272357		17073125	LOC105375787	0.0194974	0.869218	0.0328271
17124556	---	0.0124837	0.835725	0.0190513		16667105	BTBD8	0.0194999	1.14765	0.0321037
16761139	LOC728715	0.0125148	1.17144	0.021876		17064459	ABCF2	0.0195071	0.875149	0.033361
16944798	KALRN	0.0125374	0.898368	0.0285523		16729638	LOC102724712	0.0195248	0.871631	0.0321037
16999773	LOC105379175	0.0125593	1.19815	0.0194292		17082976	PGM5P3-AS1	0.0195357	0.81763	0.0297041
17119962	---	0.0125664	0.875958	0.024043		16959386	SLCO2A1	0.0195379	1.24584	0.0284743
16921096	SLCO4A1-AS1	0.0125675	1.19422	0.0194863		17072047	RAD21-AS1	0.0195417	0.899391	0.0411549
16954669	ABHD14B	0.0125699	0.91362	0.0346355		16743912	CARD16	0.0195502	0.819406	0.028968
17068093	TACC1	0.0125828	1.12956	0.0257913		16830326	ELP5	0.0195628	0.82739	0.0305705
16787047	---	0.0125987	0.910179	0.0344922		16712292	HACD1	0.0195753	1.25515	0.0285662
17038031	---	0.0126146	1.19561	0.0201521		16927840	IGLL5 /// IGLV3-1	0.0195803	0.768752	0.0280526
16786167	PSEN1	0.0126182	1.11114	0.0289803		17093441	C9orf24 /// FAM219A	0.0195951	0.81488	0.0302142
16934432	---	0.0126205	1.3031	0.016127		16805795	OR4F15 /// OR4F6	0.0196207	1.20219	0.030267
16901427	UXS1	0.0126237	0.859247	0.0218774		16670387	HIST2H3A /// HIST2H3C	0.0196472	0.875494	0.0345569
17007352	HLA-DPB1	0.0126285	1.11725	0.0264378		16692616	HIST2H3A /// HIST2H3C	0.0196472	0.875494	0.0345569
17031219	---	0.0126285	1.11725	0.0264378		16756475	PWP1	0.0196536	0.909213	0.0506366
17041318	---	0.0126285	1.11725	0.0264378		17015158	TUBB2B	0.0196642	1.21499	0.0293287
16992053	MIR103B1	0.0126341	1.10326	0.032272		17056550	---	0.0196727	0.828664	0.0302142
17012299	LOC643623	0.0126424	1.08172	0.0441971		16717562	SEC31B	0.0196754	0.885184	0.037522
16859018	MIR639 /// TECR	0.0126536	0.874569	0.0232511		16800989	MIR4712	0.0196876	1.08815	0.0599596
16781838	TRAV5	0.0126642	0.715037	0.0151092		16946787	HPS3	0.0197236	0.805351	0.0293234
17045258	EPDR1 /// GPR141	0.0126672	1.32271	0.0162507		16650895	---	0.019734	1.23637	0.0293187
16971344	---	0.0126732	1.16978	0.0210027		16675376	MIR1278	0.0197822	1.19329	0.030267
16898518	PPP3R1	0.0127355	1.06934	0.0546889		17000744	---	0.0198457	1.15692	0.0319861
17124418	---	0.0127362	1.16067	0.0223151		17027559	---	0.0198503	0.832435	0.0305431
16782094	TRAJ14	0.0127419	0.793957	0.0174872		16705039	---	0.0198614	0.826216	0.0305705
16896836	SLC8A1	0.0127713	1.31607	0.0164791		17021754	MAP3K7	0.0198624	0.92103	0.0713055
16727976	ALDH3B1	0.012772	1.14853	0.023667		17124630	---	0.0198666	0.803979	0.028968
17125106	---	0.0127746	1.27964	0.0169012		16883477	PDCL3	0.0198728	0.778506	0.0285662
16880942	PLEK	0.0127795	1.09781	0.0320011		16650841	---	0.0198952	1.52183	0.0271053
16771432	---	0.0127994	1.25724	0.0174678		17105319	---	0.0199211	1.11263	0.0378085
16725041	FAM111B	0.0128004	0.584911	0.0131948		16933314	HPS4	0.0199492	0.887414	0.0369849
16990787	SPINK7	0.0128413	0.883682	0.0257913		16929648	LOC105377199	0.0199592	1.13135	0.0350767
17046673	LOC100996437	0.012847	0.925953	0.0480304		16781889	TRAV9-2	0.0199611	1.09462	0.0485777
16781695	ARHGEF40	0.0128604	1.21257	0.0190513		16795192	SPTLC2	0.0199812	1.19739	0.0304698
17118058	LOC643784 /// LOC728093	0.0128862	1.4312	0.0153551		16832268	MAP2K3	0.0199912	0.852469	0.0319769
17118066	LOC441081	0.0128862	1.4312	0.0153551		16844200	MIEN1	0.0199971	0.891236	0.03898
17118104	---	0.0128862	1.4312	0.0153551		16655449	---	0.0200266	1.28297	0.0280246
17118127	LOC101929599 /// LOC101929812 /// LOC102724994 /// LOC102724995 /// LOC105369229	0.0128862	1.4312	0.0153551		16655479	---	0.0200266	1.28297	0.0280246
16664748	GPX7	0.0128968	0.816266	0.0178233		16810061	---	0.0200295	1.08909	0.05449
16936137	CERK	0.0129104	0.910263	0.0330202		17120378	---	0.0200529	0.894727	0.0394059
16681775	MTHFR	0.0129219	1.10073	0.031883		16725742	FADS2	0.0200576	0.809089	0.0293187
17078976	LINC01030	0.0129309	1.15132	0.023904		16751795	AMHR2	0.0200604	0.895323	0.0373956
16747363	LOC100127974	0.0129491	0.902049	0.0283322		17004339	PSMG4	0.0200963	1.1448	0.0328427
16652015	---	0.0129593	0.587036	0.0152403		17062486	LOC101928211	0.0201098	0.839743	0.0307437
16652679	---	0.0129593	0.587036	0.0152403		16796561	---	0.0201115	1.09551	0.0473142
16743647	MMP7	0.012969	0.900134	0.0306964		16914478	EYA2	0.0201288	1.2655	0.0279587
16817883	ITGAL	0.0129712	1.11453	0.028075		16778644	---	0.0201516	0.822433	0.0299014
16911336	RNU105B	0.0129747	1.55693	0.0147825		16771533	---	0.0201531	0.465268	0.0253597
16782054	TRAJ35	0.0129904	0.82283	0.0173177		16768297	DUSP6	0.0201669	0.800099	0.0293948
16779305	LINC00282	0.0129915	0.868501	0.0247157		16883690	IL1RL1	0.0201799	1.26016	0.0284743
17052598	TRBV5-1	0.013016	0.818387	0.0186061		16664569	CDKN2C	0.0201933	0.770475	0.028968
16941809	CACNA1D	0.013023	1.13002	0.026357		17081822	LOC101927963	0.0202328	1.13238	0.0347578
17076344	---	0.0130259	1.12625	0.0252821		16752014	---	0.0202421	0.498508	0.025609
16868481	OLFM2	0.0130371	0.778325	0.0169012		16725589	TMEM138	0.0202576	0.837116	0.0307323
17075589	NEFL	0.0130404	0.814545	0.0178233		16870493	COPE	0.0202646	0.81156	0.030267
16969528	AIMP1	0.0130435	0.910859	0.0328869		16983432	LOC105374663	0.0202873	1.20161	0.030267
16935366	DNAJB7	0.0130507	1.13497	0.0252545		16980693	FBXW7	0.0202954	0.832608	0.029624
16665674	AK4	0.0130677	1.13164	0.0253394		17123610	---	0.0202972	0.941094	0.127634
16910070	MIR4441	0.0130859	1.25928	0.0176239		17043633	PER4	0.0203031	0.895404	0.0388225
16787213	LINC01146	0.0131044	1.12225	0.0266563		17002753	FBXW11	0.0203144	0.839371	0.0307437
16929529	TOM1	0.0131087	1.12392	0.0263673		16673652	LOC100127910	0.0203197	0.77648	0.028528
16941781	PRKCD	0.0131253	1.08442	0.0420735		16956956	---	0.0203273	1.23096	0.0293948
17123758	---	0.0131358	0.953511	0.145239		16964985	FAM90A26	0.0203312	0.923523	0.0651043
16916261	PCMTD2	0.0131458	0.895149	0.0279385		16723461	LOC105376619	0.0203363	0.904279	0.0438781
16724358	ATG13	0.013158	0.931489	0.057229		16662132	---	0.0203608	1.13916	0.0331274
17117878	LOC729164	0.0131745	1.14522	0.0246953		16985599	CCNB1	0.0203652	0.822581	0.030267
16749722	---	0.0131805	0.708268	0.0155006		16881427	---	0.0203792	1.15949	0.0317162
17121236	---	0.0131815	0.828598	0.0194292		16713187	NRP1	0.0203815	0.868014	0.0322881
16809923	LOC101928725	0.0131926	0.861725	0.0223151		16803059	CSK	0.020388	0.83926	0.0308542
16922327	ITSN1	0.0131947	1.198	0.0195462		16870443	CRLF1	0.0203935	0.905672	0.0487542
17013694	PLEKHG1	0.0131956	0.698775	0.0149155		16971494	---	0.0203935	1.1902	0.030267
16906285	CALCRL	0.0132214	1.25108	0.0180601		17044424	---	0.0203988	0.371906	0.0259238
16708533	PPRC1	0.0132367	0.880327	0.0248897		17125542	---	0.0204271	1.14516	0.0328636
16947974	FNDC3B	0.0132521	1.25596	0.0178233		16763138	KIF21A	0.0204309	0.791944	0.0293234
16880362	---	0.0132654	1.13821	0.0253394		16725240	MS4A5	0.0204507	1.10565	0.0425799
16961308	GOLIM4	0.013281	1.24521	0.0180601		17092748	---	0.0204808	1.44596	0.0279059
17111005	LOC105373204	0.0132929	0.789409	0.0174031		17004266	LINC01011 /// NQO2	0.0205202	0.887993	0.0370084
16650195	---	0.0133017	1.61981	0.0143595		16699171	LOC102723802	0.0205453	1.11291	0.0393656
16663792	ATP6V0B	0.0133021	1.14504	0.0234292		17005197	RNF144B	0.0205489	1.45694	0.0270752
17124068	---	0.0133036	1.24555	0.0184394		17110125	---	0.0205497	1.12508	0.0367067
17069272	CHD7	0.0133161	0.89733	0.0289088		16654789	---	0.0205534	1.27557	0.028528
17097869	MEGF9	0.0133222	1.30382	0.0166055		16800748	---	0.0205562	1.08953	0.0535235
16706389	---	0.0133235	0.86571	0.0240132		17081249	LOC105375759	0.0205606	1.17754	0.0297388
16745113	BCL9L	0.0133313	0.851172	0.0207351		16852371	SMAD4	0.0205962	0.637046	0.0275785
16652459	---	0.0133588	1.46166	0.0151512		16897401	LHCGR	0.0205992	0.801142	0.030267
16920169	B4GALT5	0.0133701	1.19194	0.019639		16960512	LOC101928105	0.0206183	1.20475	0.030267
16865684	---	0.0133768	0.799664	0.0176965		16678824	MAP10	0.0206444	0.885768	0.0360604
16672893	FCGR2A	0.0133785	1.39956	0.0152403		16981760	AGA	0.0207008	0.845197	0.0319861
16875042	---	0.013379	0.844973	0.0209358		17004747	PAK1IP1	0.0207067	0.74342	0.0279587
16993412	---	0.0133919	1.10318	0.0322801		16821139	MON1B	0.0207097	0.779802	0.028968
17124388	---	0.0133963	0.792809	0.0178642		16985964	MIR4803	0.0207107	1.29276	0.0284743
16858592	ZNF844	0.0133984	0.797217	0.0175391		17046133	---	0.0207345	1.14193	0.0332689
16703919	---	0.0134077	1.1538	0.0226639		16806461	NDNL2	0.0207566	0.788428	0.0297363
16958704	TXNRD3 /// TXNRD3NB	0.0134103	0.866177	0.0225501		16651519	---	0.0207592	0.689939	0.0277284
16824307	---	0.0134296	1.16291	0.0216114		16872884	PSG6	0.020771	1.23534	0.028968
16831958	PRPSAP2	0.013438	0.90696	0.0320126		16728429	---	0.0207913	1.21098	0.0298845
16894053	---	0.0134441	1.17608	0.02083		16798208	SNORD116-20 /// SNORD116-21 /// SNORD116@	0.0208162	1.18485	0.0306677
17094893	ALDH1A1	0.013449	1.27896	0.0178233		16651297	---	0.0208774	1.62398	0.0271053
16840169	---	0.0134497	1.16134	0.0216398		16845427	MEOX1	0.0208965	0.784644	0.0292724
16815787	---	0.0134623	0.815135	0.019115		17123452	---	0.0209142	0.905195	0.0448968
16697196	FAM129A	0.0134718	1.21288	0.0194624		16836860	LOC101927877	0.020915	1.11461	0.0401614
17056957	---	0.0134782	0.816769	0.019639		17063446	---	0.0209406	1.16033	0.0318094
16716870	TCTN3	0.0134807	0.859922	0.0221124		16971272	EDNRA	0.0209635	0.641633	0.027
17061759	NRCAM	0.013496	0.684026	0.0156219		16693291	TCHH	0.0209786	1.14954	0.0322881
16883534	RPL31 /// TBC1D8	0.0135009	0.875607	0.0244701		16724795	OR5AR1	0.0210214	1.1293	0.0355049
16810954	RPL4	0.0135026	0.947516	0.0889211		16900530	---	0.0210291	0.531533	0.0264231
16992557	CPEB4	0.0135053	1.12823	0.0264266		17126098	---	0.0210513	0.788728	0.0285662
16701921	LOC105376367	0.0135182	0.862582	0.0227056		17085379	FAM27B	0.0210618	0.865695	0.0333643
16849982	ALYREF	0.013556	0.874495	0.0246632		16719506	CLRN3	0.0210635	0.926357	0.0746023
17126232	---	0.0135603	1.16425	0.021876		16900100	IGKV1-5	0.0210655	1.12566	0.0361205
16662664	MANEAL	0.0135821	0.851873	0.0212331		16839482	---	0.0210691	1.18026	0.0308371
16934045	PIK3IP1	0.0135908	1.13231	0.0253394		17056891	FAM183BP	0.0210722	0.7969	0.0305431
17121540	---	0.0136155	1.12418	0.0256754		16813270	IDH2	0.0210941	0.843108	0.0309652
16826110	IGHV3OR16-7	0.0136223	0.757018	0.0165182		16914839	---	0.0211048	0.775823	0.0285662
16931463	TBC1D22A	0.0136417	1.08628	0.0391264		16885183	LOC105373587	0.0211156	1.14285	0.0330428
16793800	---	0.0136658	0.818803	0.018556		16676983	G0S2	0.021117	0.824762	0.0319861
16654907	---	0.0136744	1.43909	0.0155237		16671901	RAB25	0.021121	0.804581	0.029624
17095345	SLC28A3	0.0136787	1.15861	0.021896		16758107	RNF34	0.021127	0.881963	0.0338951
16692834	CTSS	0.0136798	1.14702	0.024905		16866940	LSM7	0.0211298	0.835065	0.0307437
16922102	SOD1	0.0136866	0.881901	0.0249087		17090646	GTF3C4	0.021138	1.10885	0.0465575
17125750	---	0.0136869	0.760407	0.0167314		16661862	TINAGL1	0.0211385	1.19076	0.0317322
16701311	---	0.0137009	0.800823	0.0194186		17064791	CNPY1	0.0211461	1.09217	0.0483896
16860626	LRP3	0.013718	0.835886	0.0195939		16655911	---	0.0211546	0.748482	0.0284743
16695490	F11R	0.0137417	1.06379	0.0698904		16877667	FKBP1B /// MFSD2B	0.0211569	0.844009	0.0307528
16798240	IPW /// SNRPN	0.0137454	0.836291	0.0195481		17080688	LOC105375735	0.0211965	0.873876	0.0345019
16838073	AANAT	0.013748	1.17589	0.0221124		16935560	CYP2D6	0.0212011	0.876545	0.0329105
17043154	---	0.0137487	1.22727	0.0199624		16828599	LOC102724084	0.0212046	1.10109	0.0437395
16838094	SNHG16	0.0137665	0.858023	0.0214986		16771515	---	0.021242	0.382073	0.02671
17006984	SKIV2L	0.0137919	1.08654	0.0401242		16952737	KIAA1143	0.0212525	0.860567	0.0328636
16755028	LOC101928617	0.0137932	1.14103	0.0252821		16797098	LOC105370690	0.0212735	1.15189	0.0321037
17052681	TRBJ2-6	0.0137966	0.838833	0.0201521		17078059	---	0.0212827	1.12733	0.035276
17119660	---	0.0137966	0.838833	0.0201521		17021736	---	0.0212968	0.908709	0.0475803
16866815	KLF16	0.0138035	1.17917	0.0207614		16669930	RNF115	0.0213104	1.22762	0.0306845
17076063	GSR	0.0138234	1.09814	0.0338331		17092754	SLC24A2	0.021338	1.10109	0.0437986
16777331	---	0.013825	1.19391	0.0201521		16766655	---	0.021349	0.829969	0.0307437
16796810	LOC105370676	0.0138514	1.24529	0.0186213		16978024	---	0.0213545	1.1244	0.0361284
16943404	TRMT10C	0.0138681	0.886266	0.0264378		16713309	FZD8 /// MIR4683	0.0213629	0.851843	0.0319861
17123246	---	0.0138715	0.870309	0.0231441		16990949	CARMN /// MIR143 /// MIR145	0.0213666	0.793086	0.0293187
16813029	HAPLN3	0.0138748	0.799603	0.0175137		16988861	ISOC1	0.0213778	0.849626	0.0319861
17074342	LINC00965	0.0138996	0.832481	0.0198245		16699009	LPGAT1	0.0213803	0.75716	0.0285662
16760018	LOC283440	0.0139103	0.825318	0.0194624		16881239	LOC105374796	0.0213813	1.16145	0.0321331
16738058	---	0.0139178	0.747926	0.0163104		16993538	BTNL8	0.0213884	0.906048	0.0527605
16650423	---	0.01395	0.65002	0.0145193		16650027	---	0.0213886	1.17131	0.030872
16712368	---	0.0139566	1.12218	0.0269223		16693844	KCNN3	0.021424	1.12033	0.0371801
16970068	SNHG8	0.0139953	0.843777	0.0205154		16920671	PMEPA1	0.0214457	0.772834	0.028968
16838480	LOC101928738	0.0140019	1.15754	0.0227578		17115617	FAM3A	0.0214521	0.825111	0.0303668
16668969	HIPK1	0.014005	1.08299	0.042164		16927198	RANBP1	0.0214947	0.882256	0.0366754
17061117	RASA4 /// RASA4B	0.014022	1.17731	0.0212673		16942825	---	0.0215097	1.16049	0.0327485
16873991	---	0.0140316	0.890624	0.0255508		16983498	LOC102725105	0.0215417	0.930624	0.0916778
16839602	SNORD91B	0.0140356	0.778235	0.0174619		16721529	OR10A4	0.0215459	0.871209	0.0364948
16695700	FCGR3A	0.0140373	1.4252	0.0163104		16857237	TNFAIP8L1	0.021547	1.14307	0.0319861
16828705	MPHOSPH6	0.0140497	0.884997	0.0263421		16840550	DVL2	0.0215501	0.87708	0.034678
16977807	---	0.0140582	0.826597	0.0201982		16674965	LOC102724830	0.0215713	1.16611	0.0318519
17077594	ASPH	0.0141045	1.15559	0.0228089		16998532	ST8SIA4	0.0216123	0.708795	0.0279587
17112364	ITM2A	0.0141071	0.873445	0.0245527		16820508	TANGO6	0.0216267	0.831628	0.0307437
16983765	NPR3	0.0141199	1.12424	0.0269071		16673502	LOC105371603	0.021657	1.17515	0.0310173
17074673	CTSB	0.014133	1.11179	0.0277222		16746520	LOC101929384	0.0216586	0.912553	0.0556504
16775856	DNAJC3	0.0141647	1.15379	0.0228561		16764102	---	0.0216727	0.706627	0.0284743
16949864	---	0.0141779	1.19693	0.0205154		16836181	---	0.0216828	0.861899	0.0321037
16680274	AURKAIP1	0.0141869	1.15916	0.0221768		16933140	GGT5	0.0216946	1.24092	0.0284743
16992122	DOCK2	0.0142137	1.08009	0.0482976		17115934	XG /// XGY2	0.0216995	1.2817	0.0284743
16950340	---	0.0142396	0.906513	0.0322798		16815985	MKL2	0.0217068	1.2564	0.0293187
16878994	RASGRP3	0.0142527	0.729544	0.0163104		17122502	---	0.0217255	0.933557	0.0985412
17124134	---	0.0142645	1.17174	0.0223761		16752023	---	0.0217276	0.692008	0.0271019
16746696	ADIPOR2	0.0142715	1.16865	0.0223906		16821330	PLCG2	0.0217363	0.795531	0.0285662
17061123	RASA4 /// RASA4B	0.014296	1.12599	0.0268802		17035334	---	0.0217369	0.874179	0.0343668
17116908	---	0.014306	1.13446	0.026357		16802942	---	0.0217618	1.59318	0.0271053
16736215	---	0.0143138	0.872228	0.0243331		17027581	---	0.0217685	1.26027	0.0278706
16793222	---	0.0143293	0.819598	0.0194292		17019916	DEFB113	0.0218066	1.1894	0.0308542
17095248	UBQLN1	0.01435	0.947363	0.112918		16843567	CCL23	0.0218439	1.15759	0.0318094
17090042	C9orf106	0.0143858	1.18188	0.0210456		16939703	ZBTB47	0.0218445	1.20164	0.0303754
16968497	ARHGAP24	0.0143867	1.20404	0.0193542		16746591	WNK1	0.0218511	1.15458	0.0333731
16770461	---	0.0143893	0.681465	0.0157566		17061853	LOC105375451	0.0218604	1.10644	0.0417222
16959178	LOC339874	0.0144342	1.18394	0.0210456		16701615	OR2T29 /// OR2T5	0.0218692	0.868357	0.0328427
16713045	---	0.0144397	1.1107	0.0308517		17085523	ANKRD20A4	0.0218717	1.22349	0.0302496
17079338	C8orf37	0.01447	0.878288	0.0251781		17121608	---	0.0218828	0.732759	0.0281465
16797326	LOC100507437	0.0144871	1.16831	0.021896		16705008	---	0.0219245	0.727611	0.028968
17002743	MIR3912	0.0144876	0.877376	0.0257955		16743614	ANGPTL5	0.0219368	1.13582	0.0350767
16887179	CERS6	0.0144877	1.07549	0.0532855		16812451	LOC102723985	0.0219627	1.21741	0.030267
17125202	---	0.0144985	0.920117	0.043923		17120586	---	0.0219674	1.0831	0.0694426
16769039	GOLGA2P5	0.0144993	0.830847	0.0200245		16725134	---	0.0219723	1.09564	0.0511931
17125182	---	0.0145423	1.22392	0.019639		17012859	PDE7B	0.0219823	0.821521	0.0297363
16968378	ENOPH1	0.0145904	0.870249	0.0238462		16687273	ECHDC2	0.0219838	1.23402	0.0302142
16692724	ANP32E	0.0145926	0.874428	0.0248892		16742517	---	0.021993	0.833105	0.0305705
16860808	---	0.0145965	1.1305	0.0269223		16779278	---	0.0219948	1.15926	0.0327485
16845290	---	0.01462	0.752965	0.0163104		17063817	TRBV10-1	0.0220068	1.1959	0.0307437
17033279	---	0.0146325	0.906443	0.0322798		16983587	LOC105374692	0.0220189	0.84569	0.0319861
16748875	LOC105369679	0.0146346	1.11343	0.0294894		16967139	IGFBP7-AS1	0.022019	1.06782	0.109669
16998007	CETN3	0.0146759	0.722621	0.0167314		16662692	UTP11L	0.0220206	0.868182	0.0342565
16883733	IL18RAP	0.0146765	1.31603	0.0175045		16748477	CDKN1B	0.0220277	1.09547	0.0478057
16823201	PRSS33	0.0146893	1.14872	0.0234965		16839261	GLOD4	0.0220365	0.861648	0.0328636
16996771	SGTB	0.0146961	0.892341	0.0278332		17122650	---	0.0220431	0.852972	0.0319769
16752103	PDE1B	0.0147035	1.19865	0.0204702		16977251	ANTXR2	0.0220568	1.21357	0.0307437
17065870	---	0.0147086	0.847659	0.0205154		16703108	---	0.0220684	1.10122	0.0433287
16856299	CFD	0.0147485	1.20949	0.0200708		17121302	---	0.0220833	0.880967	0.0357625
16712076	FAM171A1	0.0147645	0.819226	0.0203108		16687618	DHCR24	0.0221172	0.875883	0.0344803
16868968	CCDC151	0.0147657	1.09826	0.0322798		16985059	LOC105378987	0.0221393	1.11198	0.0397268
16818272	ITGAX	0.0147814	1.26615	0.0180601		16669814	ANKRD34A	0.0221398	0.800565	0.0297363
16840224	ZNF232	0.0148018	0.878674	0.0252618		16657261	---	0.0221543	0.723026	0.027
17005211	MIR548A1	0.0148156	0.768455	0.0175137		17087118	LOC102724478	0.0221602	0.891885	0.0387435
17125810	---	0.0148156	0.768455	0.0175137		16787360	---	0.022208	1.1921	0.0307437
16818733	HEATR3	0.0148232	1.12876	0.0266383		17050622	CAPZA2	0.0222138	0.884645	0.037353
16740539	AP5B1	0.0148249	1.24894	0.0185412		17062679	IMPDH1	0.0222306	1.13511	0.035214
16667903	---	0.014845	0.880646	0.0262804		17007349	BRD2	0.0222613	1.08301	0.0619616
16684056	FGR	0.014858	1.16693	0.0228867		17028404	---	0.0222613	1.08301	0.0619616
16960536	CLRN1 /// FAM188B2	0.0148617	1.1491	0.0240132		17033701	---	0.0222613	1.08301	0.0619616
16837377	---	0.0148798	0.915141	0.040722		17035966	---	0.0222613	1.08301	0.0619616
16864244	PRMT1	0.0148861	0.874569	0.0256608		17038684	---	0.0222613	1.08301	0.0619616
16857703	STXBP2	0.0148931	1.15809	0.023957		17041315	---	0.0222613	1.08301	0.0619616
16696777	---	0.0148967	1.16508	0.0221124		17067970	ASH2L	0.0222638	1.12345	0.037522
17077517	---	0.0148978	1.22065	0.0184716		16851395	---	0.022289	1.20875	0.0302071
16894181	LINC00299	0.014902	1.20613	0.019839		16870367	KIAA1683	0.0222892	0.852842	0.0319861
16784157	GNG2	0.0149288	1.20164	0.0210456		16924797	KRTAP24-1	0.0222897	1.08434	0.0619616
16909720	LOC105373934	0.0149442	0.773222	0.0180601		17042860	GPER1	0.0222949	0.798675	0.0299014
17013375	LOC105378037	0.0149545	0.807587	0.0194624		16803966	GOLGA6L9 /// UBE2Q2P2	0.0223013	0.818702	0.0305705
16696589	---	0.01496	0.81109	0.0201521		16651749	---	0.0223212	0.615201	0.0280246
16817603	SLX1A /// SLX1A-SULT1A3 /// SLX1B /// SLX1B-SULT1A4 /// SULT1A3 /// SULT1A4	0.0149621	1.11202	0.028761		17018382	NUDT3	0.0223226	0.880045	0.0363626
16845589	UBTF	0.0149829	0.859233	0.0225278		17015741	GFOD1	0.0223315	1.20378	0.0302142
16998892	REEP5	0.0149836	1.04718	0.157443		17093463	CNTFR	0.0223339	1.34097	0.0284743
16772074	NCOR2	0.0149856	1.0676	0.0702299		16764081	---	0.0223471	0.755818	0.028528
16690535	PSRC1	0.0150012	1.10925	0.0306634		16908307	CXCR1	0.0224272	1.17983	0.0318094
16931361	TTC38	0.0150101	1.14937	0.0236779		16790143	NDRG2	0.0224304	1.16127	0.0321792
16982754	LOC105374617	0.0150249	0.903043	0.0312954		17097464	HDHD3	0.0224546	0.825826	0.0307437
16995797	LOC102723740	0.0150395	0.894922	0.0294013		16983447	BASP1	0.0224626	1.11848	0.0407669
17106993	OR13H1	0.0150534	0.87969	0.026357		16974078	LOC339988	0.022473	0.898705	0.0439512
17034269	---	0.015066	0.833071	0.0216051		16915262	NPEPL1 /// STX16 /// STX16-NPEPL1	0.0224777	0.860722	0.032668
16722270	---	0.01508	1.32236	0.0174678		16884517	---	0.0224869	0.859786	0.032561
16967278	LOC105377261	0.0150839	0.87358	0.0253394		17105008	---	0.022508	1.17258	0.0318094
16663800	---	0.0150881	1.23366	0.0192015		16922200	OLIG2	0.0225177	1.15713	0.0327485
16707673	TBC1D12	0.015095	1.1855	0.0205179		17076829	MIR4469 /// RNF170	0.0225321	0.759599	0.028968
16740778	SLC29A2	0.0150958	0.828254	0.0201185		17018908	MOCS1	0.0225329	1.37841	0.0281465
17080991	LINC00861	0.0150984	0.839583	0.0213498		16748553	---	0.0225334	0.888923	0.0400745
16691431	---	0.0151111	1.27778	0.0185461		16740608	FIBP	0.0225344	0.859894	0.0321037
16813849	---	0.0151116	0.76913	0.0163104		16655419	---	0.0225469	1.27161	0.028968
16898157	FAM161A	0.0151145	1.18027	0.0229991		16706128	CHCHD1	0.022553	0.821311	0.030267
17123862	---	0.0151283	1.30967	0.0163357		17103750	MIR500B	0.0225639	1.33981	0.0279587
16917446	---	0.0151541	0.928538	0.0621978		16941268	IQCF2	0.0225862	1.14835	0.0319861
16655383	---	0.0151695	0.743394	0.0154487		17117467	GOLGA7B	0.0226018	1.18801	0.0307437
16796650	MIR151B	0.0151712	0.823001	0.0198002		16855044	TCEB3CL2	0.0226298	1.2932	0.0280246
16991659	---	0.0151742	1.15402	0.0240273		17013728	MTHFD1L	0.0226582	0.896553	0.0392483
16693898	SHC1	0.0151754	0.900127	0.0294894		17097778	---	0.0226632	1.13134	0.0348917
17008209	---	0.0151861	1.33972	0.0172804		17120610	---	0.0227025	0.725169	0.0280246
16781315	RASA3	0.0151898	0.918545	0.040722		17121908	---	0.0227077	0.780998	0.028968
17023298	RNF217-AS1	0.0152063	1.17255	0.0221124		16693280	S100A11	0.0227099	0.854078	0.032034
16660521	---	0.0152262	1.21065	0.0218467		16954796	SEMA3G	0.0227106	1.27367	0.028968
16864760	ZNF649-AS1	0.0152294	1.20226	0.0208662		17058947	---	0.0227282	1.11274	0.0403453
16855329	MBD2	0.0152368	1.08868	0.0396967		17069937	MSC-AS1	0.0227345	0.845613	0.0319861
16869562	SAMD1	0.015252	0.88809	0.0271145		16752007	---	0.022757	1.88101	0.0271406
16690566	SORT1	0.0152561	1.27927	0.0182589		16656663	---	0.0228202	1.37856	0.0281778
16767081	WIF1	0.0152647	1.09596	0.0361296		17126140	---	0.022845	0.844951	0.0322881
16806757	FMN1	0.0152792	1.22316	0.0205154		16656183	---	0.0228634	1.52689	0.0279587
17124838	---	0.0152863	0.743074	0.0171987		16805870	NBEAP1	0.0228725	1.11681	0.0376887
16970016	---	0.0153212	0.834239	0.0211734		16732319	---	0.0228733	0.802398	0.030086
16817337	SGF29	0.015328	0.892361	0.0281682		16979944	---	0.0228865	0.548274	0.0278908
16905353	MIR933	0.0153301	1.27026	0.0182645		16711797	NUDT5	0.0228885	0.81609	0.0305431
16689828	ARHGAP29	0.0153421	1.1594	0.0238679		16664476	LOC105379778	0.022892	1.13049	0.0350169
16811791	SIN3A	0.0153461	0.927273	0.0487187		16697662	MIR181A1	0.0228956	1.10972	0.0403453
17114745	SLITRK4	0.0153556	1.06556	0.0866372		17045540	---	0.0229221	0.853948	0.0327588
16923586	TRPM2	0.0153967	1.19279	0.0208801		16700233	HIST3H3	0.0229334	0.916807	0.0503528
16715228	C10orf54	0.0154231	1.18635	0.0218467		16748425	BCL2L14	0.0229344	1.0759	0.0777623
16760889	C3AR1	0.0154319	1.1409	0.0257913		17124294	---	0.0229508	0.709399	0.0279733
16995177	PRLR	0.0154804	1.27904	0.0187806		16967875	PARM1	0.0229596	1.27079	0.0301503
17092813	IFNW1	0.0154839	1.14448	0.0252821		16854016	SPIRE1	0.0229779	0.890495	0.0394199
16858820	NACC1	0.0154913	0.812246	0.0193713		17092167	---	0.0229812	1.12089	0.0385021
16798307	SNORD115-14	0.0154997	0.848024	0.0223151		16857211	MIR4746	0.0229899	0.691639	0.0282517
17069816	SULF1	0.0155049	1.12818	0.0269223		16841934	RAI1-AS1	0.0230617	0.900226	0.0425441
17120628	---	0.0155056	0.842225	0.022624		16991991	WWC1	0.0230882	1.08739	0.058795
17030610	---	0.0155173	0.875661	0.0224865		17072638	---	0.0230961	0.872925	0.0347373
17035408	---	0.0155173	0.875661	0.0224865		17059702	PEX1	0.0231091	0.821994	0.0305431
17038107	---	0.0155173	0.875661	0.0224865		16869221	WDR83OS	0.0231138	0.891422	0.0426779
17056291	SCRN1	0.0155299	1.18596	0.021965		17063267	DGKI	0.0231178	0.820389	0.030267
16893931	---	0.0155334	0.908722	0.0347953		16667590	SLC35A3	0.0231611	0.826851	0.0309797
16731105	C11orf1	0.0155428	0.85318	0.0215816		16795051	LOC105370580	0.0231726	1.13964	0.034678
17104226	ZC3H12B	0.0155515	0.813705	0.0193713		16926383	KRTAP10-1	0.0231954	1.31604	0.028968
16960271	HLTF	0.0155578	0.878999	0.0263842		16688086	LOC105378769	0.0232465	0.889527	0.0386559
16733045	EI24	0.0155585	0.883512	0.0258946		17067941	ADGRA2	0.0232555	0.827918	0.0307437
16916492	SIRPB1	0.015587	1.1643	0.023557		16767590	---	0.0232612	1.16157	0.0321037
16996089	MOCS2	0.0155983	0.88467	0.0267579		16690553	MYBPHL	0.0232688	1.1434	0.0328427
16987335	---	0.0156066	1.18931	0.0234292		16774991	---	0.0233285	1.17479	0.0318094
16929817	SH3BP1	0.0156071	1.10124	0.0334345		16917259	LOC105372532	0.0233415	0.846822	0.030872
16875478	LAIR1	0.0156244	1.11683	0.0287007		16744289	PPP2R1B	0.0233847	0.807514	0.0305705
17022588	CDK19	0.0156299	1.10814	0.032035		16807172	---	0.0233888	0.531606	0.0271053
16816020	BFAR	0.0156302	0.889171	0.0275438		16820822	IL34	0.0233915	0.820463	0.0307437
16692775	MCL1	0.0156324	1.09675	0.0319683		17117521	LOC102723539	0.0233919	1.29468	0.028968
16877946	CENPA /// SLC35F6	0.0156611	1.12425	0.0269796		16651619	---	0.0233926	1.40499	0.0284743
17125004	---	0.0156642	0.817612	0.0201749		16999472	LINC01184	0.023413	1.15796	0.0324685
16818696	---	0.0156697	0.903516	0.0342766		16686458	CCDC163P	0.0234349	1.0964	0.0472445
16782068	TRAJ28	0.01568	0.796953	0.018556		17076415	FGFR1	0.023445	1.14046	0.0357311
17119902	---	0.0156933	0.842653	0.0213195		17025879	LOC105378147	0.0234485	1.17075	0.0307437
16819155	LOC102725116	0.015708	1.09764	0.0343596		17017184	---	0.0235142	1.5479	0.0279587
17123728	---	0.0157119	0.854614	0.0225752		16912140	ENTPD6	0.0235167	0.891033	0.0406424
16658058	---	0.0157324	1.10977	0.0300116		16698756	C1orf116	0.0235417	0.86328	0.0340184
16679697	NLRP3	0.0157334	1.19022	0.0217828		16928127	CABIN1	0.0235445	0.841666	0.0310758
16811151	ANP32A-IT1	0.0157409	1.28808	0.0182845		16829111	---	0.0235482	1.13378	0.0332507
16769141	---	0.015747	0.889267	0.0276069		16984189	EGFLAM	0.0235643	1.12521	0.0345417
16734985	OR52B2	0.0157493	1.14622	0.0253685		16894557	---	0.023578	0.647728	0.0279733
16962752	---	0.0157615	1.13292	0.0269727		17057864	GS1-278J22.2	0.0235905	0.908885	0.0488393
16767991	LIN7A	0.0157632	1.23182	0.0194624		17045555	BLVRA	0.0236256	0.774265	0.0292724
16686176	KDM4A-AS1	0.0157835	0.877741	0.0255508		16851768	DSG2	0.0236394	1.23532	0.0301685
17106183	TMEM164	0.0157895	1.18081	0.0219573		16655943	---	0.023673	0.744808	0.0284743
16760139	---	0.0158325	1.18734	0.0221124		16835612	---	0.0237255	1.11494	0.0389155
16656095	---	0.0158395	1.32673	0.0175391		16946053	---	0.023731	0.741711	0.028903
16651195	---	0.0158683	0.794734	0.0190235		16774362	AKAP11	0.0237392	0.80979	0.030267
16752023	---	0.015891	1.47001	0.017411		16653071	---	0.0237418	0.6789	0.0281778
16785838	PLEKHD1	0.015893	1.12137	0.0283322		17090786	ADAMTS13	0.0237422	0.847421	0.0317162
16961232	SERPINI2	0.0158985	1.47505	0.0167314		17123680	---	0.023753	1.17521	0.0319861
16770065	ARPC3	0.0159075	1.08942	0.0380801		16990920	GRPEL2	0.0237597	0.818265	0.0307437
17092615	PSIP1	0.0159143	0.88963	0.0278788		16720353	PNPLA2	0.0237637	1.20167	0.0318094
17104259	MSN	0.0159209	1.04375	0.164729		16966680	LOC105377652	0.0237724	1.16086	0.0321792
16989423	C5orf66	0.0159299	1.18111	0.021896		17125896	---	0.023815	0.72535	0.0279587
16860912	FXYD7	0.0159379	0.867118	0.0236042		17020145	---	0.0238324	1.15136	0.0328427
16988960	---	0.0159471	1.11185	0.0301004		16975309	---	0.0238344	1.72112	0.0271053
16840919	CTC1	0.0159524	0.87862	0.0254674		16768478	EEA1	0.0238407	0.874136	0.0358665
17010316	MTO1	0.0159555	0.897289	0.0294013		16665069	LEXM	0.0238409	1.12838	0.0367067
16975203	TLR10	0.015965	0.767503	0.0178233		17117560	---	0.0238431	0.809616	0.029624
16738265	OR4C45 /// OR4C4P	0.0160091	0.902258	0.0320539		16690427	HENMT1	0.0238439	0.855476	0.032651
16854660	---	0.016013	1.19005	0.0209223		16948348	---	0.0238523	1.09574	0.0505014
16983533	LOC105374685	0.0160135	0.898617	0.029321		17123902	---	0.0238683	1.16298	0.0327485
16753498	TBK1	0.0160148	1.18976	0.0221823		16963111	---	0.0238785	1.28848	0.028968
17121298	---	0.0160405	0.836311	0.0223151		16742056	---	0.0238799	0.681115	0.0277064
16839194	DOC2B	0.0160525	1.11878	0.0285523		17085495	LINC00537	0.0239049	0.87826	0.0366706
17003180	MXD3 /// RAB24	0.016054	1.12624	0.0274421		16664118	NASP	0.0239177	1.17958	0.030872
16690789	DENND2D	0.0160812	0.906834	0.0320497		16706177	---	0.0239237	1.13759	0.0345569
16719973	---	0.0160824	1.22221	0.0205154		16815023	MLST8	0.0239627	0.872508	0.0370054
16846042	LOC101927060	0.0161041	0.769308	0.0179304		17125382	---	0.0239676	0.883315	0.0378488
17016467	ZNF204P	0.0161238	0.858017	0.0223761		16937152	LINC00312 /// LMCD1	0.0239947	1.60205	0.0278908
16976926	CDKL2	0.0161275	0.883546	0.0268802		16919388	---	0.0240061	1.10106	0.0462876
17121614	---	0.0161716	1.24894	0.0192717		17061189	NAPEPLD	0.0240127	0.83554	0.0307437
17004081	---	0.0161866	1.13343	0.0263781		16719638	LOC102725247	0.024017	1.26978	0.029624
16903919	ERMN	0.0162064	1.30916	0.0179642		16710245	ACADSB	0.0240253	0.838527	0.0318094
16686538	IPP	0.0162084	0.898063	0.0300898		16761535	PRB3	0.0240309	0.884001	0.037353
16888444	LOC105373781	0.0162102	1.15879	0.0247344		16818545	LINC01566	0.0241203	1.10235	0.045958
16975394	RBM47	0.0162216	1.1983	0.0209223		16786964	---	0.0241208	1.12614	0.0374768
17015106	SERPINB9	0.0162358	1.12539	0.0274147		16740524	RNASEH2C	0.0241499	0.862897	0.0328427
17044967	---	0.0162675	0.890391	0.0286973		16768890	---	0.0241583	1.107	0.0437986
16937503	EMC3-AS1	0.0162946	0.893352	0.0287373		17122300	---	0.0241707	1.0757	0.0835327
16908897	EPHA4	0.0163	0.89486	0.0279885		16881353	DYSF	0.0241777	0.805033	0.0300779
16689618	EVI5	0.0163007	1.30947	0.0184394		17080897	MTSS1	0.0241808	1.22234	0.030267
16720109	---	0.0163197	0.80465	0.0195188		17076081	---	0.0241855	1.1343	0.0358283
17007837	RPL10A	0.0163223	0.894178	0.028252		17122648	---	0.0242022	0.83908	0.0310363
16736167	PLEKHA7	0.0163295	1.15965	0.0242338		17109109	---	0.0242088	0.841415	0.0321331
16759531	LOC101928416	0.0163863	1.15959	0.0242338		16873826	PLA2G4C	0.0242089	0.79212	0.0293948
16729660	---	0.0163896	0.843569	0.0223906		16759280	---	0.0242123	1.16714	0.0321037
17119516	---	0.0164038	0.817027	0.0205179		16910111	OR6B2	0.0242183	1.16439	0.0320967
17119602	---	0.0164038	0.817027	0.0205179		16847839	DDX5 /// MIR5047	0.0242281	0.707023	0.0284743
17121358	---	0.0164043	0.818041	0.0206585		16847840	---	0.0242281	0.707023	0.0284743
17124220	---	0.0164104	1.15429	0.0246632		17101063	---	0.0242425	1.18504	0.031373
17044485	HOTAIRM1	0.0164117	1.236	0.0203368		16920198	TRERNA1	0.0242453	1.17666	0.0327485
16930271	MIEF1	0.0164157	1.08394	0.0449475		16927973	---	0.0242485	1.222	0.0305866
17110902	FOXP3	0.0164164	0.860028	0.0231441		16730690	---	0.0242773	1.1502	0.0331274
17096931	TMEM245	0.016425	0.902077	0.0320539		16767540	ZFC3H1	0.0243036	0.910847	0.0550141
17047268	GTF2IRD2 /// GTF2IRD2B	0.016436	0.875634	0.0253394		16789330	LOC105370689	0.0243232	0.897815	0.0435685
17001763	TNIP1	0.0164794	0.885215	0.0268802		17088957	LOC100129034	0.0243358	0.849002	0.0319769
17123652	---	0.016496	0.773342	0.0185461		16836863	---	0.0243452	0.871988	0.0328427
16773748	EEF1DP3	0.0165368	1.19728	0.0213498		17084736	CREB3	0.0243658	0.850469	0.0323402
16853443	---	0.0165376	1.18478	0.0223151		16651237	---	0.0243697	0.607961	0.0281778
17112469	MIR548I4	0.0165704	0.83988	0.0220507		16892826	ACKR3	0.0244062	0.789248	0.0307437
16676999	TRAF3IP3	0.0165735	0.926196	0.0530052		16786264	ACOT4	0.0244171	0.76277	0.029339
16950877	TMEM40	0.0165776	1.1654	0.023963		16651089	---	0.0244246	1.30444	0.028968
17123764	---	0.0165819	1.14721	0.0253956		16677535	---	0.0244249	1.09545	0.0500436
16964731	LOC93622	0.0165838	0.825286	0.0205154		16914891	---	0.0244503	1.11164	0.0415236
16853498	LPIN2	0.0165874	0.902584	0.0305154		17074893	LOC105379292	0.0244528	1.18348	0.0315687
16798242	SNORD116-30	0.0165876	0.688211	0.0169195		16874978	ZNF350	0.0244708	0.896111	0.0393924
17058640	---	0.0165913	1.15729	0.026357		16849306	---	0.0244824	1.28994	0.0293187
16782008	TRAJ61	0.0166053	0.670935	0.0163357		17120832	---	0.0244964	1.12153	0.0382205
16856757	OAZ1 /// SPPL2B	0.0166059	1.0665	0.0845256		16707026	CFL1P1	0.0245286	0.882642	0.0367656
16932831	MAPK1	0.0166183	1.07721	0.0559938		16708192	ABCC2	0.0245485	1.20102	0.0309652
17117533	ZBTB16	0.0166231	1.47707	0.0169363		16866431	C2CD4C	0.0245535	0.781393	0.030267
17044773	LINC01176 /// ZNRF2	0.0166396	1.18147	0.0223761		16701689	---	0.0245869	0.799173	0.0305705
17052645	TRBV28	0.0166425	0.736482	0.017362		16743797	LOC105369464	0.0245885	1.10063	0.0491345
16972961	C4orf47	0.0166446	0.883036	0.0272357		17050765	KCND2	0.0245944	0.692372	0.0285662
16671472	TDRD10	0.0166681	0.901938	0.0318801		17023924	LOC105378011	0.0246337	1.07984	0.0679564
16687723	LOC105378741	0.0167066	1.10154	0.0336116		16653029	---	0.0246353	1.13677	0.0370299
16720728	LOC100505570	0.0167176	1.24667	0.0194045		16874228	KCNA7	0.024636	1.16121	0.0327485
17117641	LOC101929634	0.0167193	1.20127	0.0212673		16773154	---	0.0246458	1.1387	0.0358772
16656453	---	0.0167207	0.787138	0.0203387		16654539	---	0.0246697	0.72419	0.0284743
16931553	FLJ44385	0.0167219	1.18348	0.0222631		16893761	---	0.0247398	1.25124	0.030095
16979400	PRDM5	0.0167378	1.16533	0.0246632		16746696	ADIPOR2	0.0247463	0.867924	0.0334106
16734287	KRTAP5-3	0.0167494	1.35513	0.0178604		16933158	ADORA2A-AS1	0.0247539	0.87694	0.0348917
16717290	MIR1287 /// PYROXD2	0.0167668	1.08975	0.03872		16699055	LOC101929541	0.0247714	0.81138	0.0305705
17023467	---	0.0167798	0.89457	0.0287373		16897872	LOC100129434	0.0247991	1.31516	0.0297363
16780055	---	0.0168106	0.891668	0.0294191		16963396	---	0.024846	1.20831	0.0307437
16695205	TAGLN2	0.0168142	1.08473	0.0390437		17110122	MID1IP1-AS1	0.0248481	0.814	0.0305705
16856315	ARID3A	0.0168333	1.1799	0.0225832		16876941	LOC105373418	0.0248702	1.09475	0.058455
16962519	ADIPOQ-AS1	0.0168386	1.19991	0.0221124		16748117	---	0.0248861	1.19981	0.0310173
17022736	TUBE1	0.0168477	0.817927	0.0202474		16798801	ARHGAP11B	0.0248936	0.790743	0.0305705
16917872	---	0.0168492	1.18071	0.0216398		17107097	SMIM10	0.0248978	0.736241	0.0293187
16804709	LOC105370966	0.0168503	1.17731	0.0223761		16763295	PRICKLE1	0.0248991	0.80281	0.0297363
17014599	---	0.0168516	1.20212	0.0210605		16867680	KHSRP /// MIR3940	0.0249097	0.935273	0.112405
17122676	---	0.016882	1.07293	0.0613431		17122200	---	0.0249241	0.829371	0.0307437
16871662	ZFP82	0.0168871	0.830783	0.0207935		17089446	CDK9	0.0249319	1.16482	0.0320257
17120000	---	0.01689	0.858109	0.0235487		16864934	ZNF525	0.0249387	1.19902	0.030776
16767225	LOC102724433	0.0168968	1.1122	0.0298116		16862677	CIC	0.0249653	0.843255	0.0319861
16773086	FGF9	0.0169148	0.826329	0.0201312		16920036	---	0.0249698	1.28072	0.0294628
16990145	---	0.0169276	0.734731	0.0176985		17120708	---	0.0250213	0.832187	0.0318519
17015217	---	0.0169294	1.14154	0.0274421		16781970	TRAV36DV7	0.0250317	1.11388	0.0438781
16935121	---	0.0169398	0.885795	0.0274147		17087976	LOC105376208	0.0250399	1.09624	0.0487166
16749759	BICD1	0.0169488	0.928581	0.0528096		16878676	LBH	0.0250478	0.913616	0.0530048
17122642	---	0.0169602	1.15086	0.0241604		17112439	RPS6KA6	0.0250792	1.08424	0.0571468
16960803	LINC00880	0.0169689	1.10489	0.0335723		17069782	C8orf34	0.0251124	0.749448	0.030267
17120912	---	0.0169734	0.849332	0.0225832		16850487	ADCYAP1	0.0251207	1.16286	0.0328427
16796564	LINC01550	0.016993	0.818097	0.0205154		16750256	LOC105369738 /// LOC105369739	0.0251251	0.909824	0.0518366
16781873	TRAV12-2	0.0170054	0.746286	0.0178986		17120070	---	0.0251266	1.19473	0.030872
16970713	---	0.0170284	0.921258	0.0476048		16674580	---	0.0251593	0.871813	0.0350767
16911143	---	0.0170301	1.14928	0.025617		16873557	PNMAL2	0.0251656	0.818498	0.0300631
16804867	CRTC3	0.0170343	0.883254	0.0257913		17072979	KHDRBS3	0.0251794	0.797646	0.0305431
16697660	MIR181B1	0.0170413	1.25682	0.0194624		16918294	TSPY26P	0.0251796	1.30542	0.028968
16763280	ZCRB1	0.0170447	0.920429	0.0428815		16917281	---	0.0251973	1.05734	0.128585
17068136	---	0.017075	1.28908	0.019839		17012428	LOC101928140	0.0252115	0.916902	0.0589541
16899062	DUSP11	0.0170819	0.923354	0.0473035		16653943	---	0.0252243	0.766762	0.0297041
16653085	---	0.0171148	0.612503	0.0169412		16822649	LOC100130430	0.0252671	0.838731	0.0321037
17007475	PHF1	0.0171188	0.925411	0.0486265		16972100	LINC01207	0.025321	0.938761	0.110931
17004518	LY86	0.0171276	1.0753	0.0584634		16707951	SLIT1-AS1	0.0253329	1.09309	0.0543252
17059323	SEMA3A	0.0171359	0.836987	0.0218774		16757776	CCDC60	0.0253397	0.890545	0.0388546
16671334	UBAP2L	0.0171436	0.958851	0.167289		16778378	LINC00598	0.0253485	1.11085	0.0421171
16846976	VEZF1	0.0171501	0.902834	0.0318748		16930138	---	0.0253785	0.895937	0.0433897
16916270	PCMTD2	0.0171738	0.765986	0.0179626		17124538	---	0.0254151	0.80306	0.0305705
16986734	FAM151B	0.0171761	1.35292	0.0178233		16997636	---	0.0254504	0.755608	0.029624
16655111	---	0.0171776	0.674977	0.017246		16997178	LOC105379036	0.0254545	1.13383	0.0374693
17084182	---	0.0171872	1.15198	0.0247786		16987265	LOC105379080	0.0254783	0.906362	0.0465356
16936452	PLXNB2	0.0172081	1.20736	0.021404		17099674	---	0.0255134	1.15432	0.0314108
17071852	---	0.017235	1.1799	0.0227056		16835401	HOXB-AS1 /// HOXB-AS3	0.0255137	0.924099	0.082792
16769838	MIR619	0.0172391	1.14087	0.0248897		16877834	---	0.0255243	1.10864	0.0444389
16781893	TRAV12-3	0.0172522	0.754347	0.0180601		17024549	UST-AS1	0.0255419	1.13037	0.0371801
16961670	NAALADL2-AS3	0.0172612	0.859697	0.0244701		16650353	---	0.0255763	0.74787	0.029624
16877085	---	0.0172665	1.13779	0.0272357		17022354	---	0.0255993	0.570773	0.0281778
17075248	GFRA2	0.0172794	1.1239	0.0283375		17112337	---	0.0256675	0.796502	0.030267
17113707	---	0.0172944	1.24486	0.0210027		17018615	ETV7	0.0256945	1.09014	0.0579348
17078388	CASC9	0.017296	1.18441	0.0223761		17025844	THBS2	0.0257033	1.20231	0.0307437
16751401	ACVR1B	0.017303	1.10265	0.0333331		17088780	LOC105376262	0.0257163	0.847691	0.033361
16834766	GRN	0.01732	1.10267	0.0319761		17019338	DNPH1	0.0257208	0.88707	0.0382205
16729290	TSKU	0.0173378	1.2	0.0214566		16934233	---	0.0257258	0.713933	0.028968
16877849	GAREM2	0.0173508	0.880449	0.0264266		16757806	PRKAB1	0.0257484	1.1359	0.0359567
17017935	HLA-DOB	0.0173671	0.823432	0.0202474		17042883	UNCX	0.025759	0.858714	0.0327485
16995713	---	0.0173714	0.798255	0.0192717		17100281	---	0.025763	1.14588	0.0328427
16721223	OR52J3	0.0173852	0.825801	0.0211243		16800209	TUBGCP4	0.0257813	0.902983	0.0455549
16677167	LOC105748977	0.0173852	0.884316	0.028252		17117515	LINC01166	0.0257919	1.18474	0.0322881
16798085	IPW /// SNRPN	0.0174232	0.825096	0.0207847		16737316	LOC100507144	0.0258396	1.11172	0.0395238
16703715	ZEB1	0.0174265	0.845566	0.0228848		16981538	SCRG1	0.0258584	1.13843	0.0357437
16781168	LOC102725228 /// LOC440149	0.0174364	0.883927	0.0267902		16829629	SRR	0.0258649	0.814361	0.030267
16811464	HIGD2B	0.0174488	0.922309	0.0482445		16705959	---	0.0258748	1.23131	0.030267
16769159	GNPTAB	0.0174747	1.08444	0.0456418		16836788	METTL2A	0.0258792	0.60356	0.0281778
16923347	RRP1B	0.0174887	0.924564	0.0462731		16834975	---	0.0258862	0.871076	0.033144
16729550	LOC105369413	0.017502	1.08912	0.0427852		16918199	---	0.0258866	1.18781	0.0319861
16933413	LOC105372978	0.0175141	1.14198	0.0259205		16976842	PPBPP2	0.0258867	0.850876	0.0327588
17013520	SASH1	0.0175209	1.2183	0.0207127		16844533	KRT40	0.0258913	1.16544	0.0327485
17095375	AGTPBP1	0.0175283	1.12597	0.028114		16678998	---	0.0258962	1.13556	0.0359586
17006299	---	0.017535	0.719572	0.0177209		16881802	DOK1	0.0259034	0.780451	0.0305431
17042519	---	0.0175461	1.05912	0.0990856		16775375	---	0.0259684	0.881761	0.0371801
16858435	CCDC159	0.017547	1.15035	0.0263709		16853791	LOC105371976	0.0259801	1.14626	0.0332284
16889103	LOC101927596	0.017582	0.77482	0.0192015		17120434	---	0.0259821	1.12158	0.0398105
16979983	---	0.0175872	1.16275	0.0228089		16801636	LOC105370839	0.0260064	1.11224	0.0415315
16801473	AQP9	0.0176005	1.48539	0.017362		16831313	MGC12916	0.0260081	1.20428	0.0309076
17127681	---	0.0176029	0.784832	0.0192717		16825196	NSMCE1	0.0260096	0.85486	0.035214
16743336	SNORA8 /// TAF1D	0.0176268	0.879019	0.0263781		17122242	---	0.0260357	0.86704	0.0340184
16885118	RALB	0.0176285	1.13617	0.0264266		17116080	---	0.0260542	1.13952	0.0357437
17100871	---	0.0176634	0.913142	0.0390437		17108953	VCX2	0.0260661	0.78453	0.030267
16781885	---	0.0176839	0.777977	0.0189062		16688790	---	0.0260796	1.11028	0.0436642
16764078	---	0.017691	1.13721	0.026357		16804625	LOC105371031	0.0261011	0.853918	0.0333731
16985748	LOC102725182 /// LOC643784 /// LOC728093	0.0176958	1.40145	0.0179642		17086596	SPIN1	0.0261038	0.809807	0.0305705
17122274	---	0.0176991	0.903161	0.0338222		16962858	---	0.0261153	0.834191	0.0318094
16775732	SLITRK5	0.0177233	1.20295	0.0214566		17064379	SLC4A2	0.0261199	0.857846	0.0328271
16772808	---	0.0177399	0.894136	0.0307103		16897487	---	0.0261403	1.26327	0.0304698
16875366	LILRA6 /// LILRB3	0.0177412	1.20638	0.021255		16670469	C1orf54	0.0261433	0.765784	0.0294628
17008196	ZFAND3	0.0177565	1.1068	0.0312009		17065169	MIR3674	0.0261817	0.869839	0.0358283
16756307	LOC101929132	0.01779	0.849253	0.0225501		16915974	---	0.0262156	1.14189	0.0359586
16984394	CCDC152	0.0177918	0.767509	0.0185461		16751996	---	0.0262503	2.05477	0.0284743
17102418	FAM47B	0.0177941	1.17335	0.0244636		16942100	LOC105377104	0.0262728	0.821669	0.0319861
16925570	---	0.017798	0.84858	0.0225832		16728994	POLD3	0.0263039	0.908665	0.0465575
16872407	C19orf47	0.017801	0.851152	0.0223906		16988469	ZNF474	0.0263105	1.26426	0.030267
17038243	---	0.017813	1.14926	0.025055		16852431	---	0.0263116	1.20715	0.0309654
16955939	LRIG1	0.0178186	0.912952	0.036218		16835299	TBKBP1	0.0263365	0.858333	0.0328427
16865383	LILRA1	0.0178389	1.15319	0.0253685		16795664	FOXN3	0.0263668	1.1593	0.0365208
17003781	C5orf45	0.0178924	0.897662	0.0301869		16817685	MVP /// PAGR1	0.0263785	0.842594	0.0319861
16676682	IL24	0.0178981	0.857191	0.0234821		17104674	---	0.0263942	0.535627	0.0284743
16922047	---	0.0179154	1.22761	0.0205154		17118384	C9orf3	0.0264029	0.83983	0.0321037
16857972	ZNF177 /// ZNF559 /// ZNF559-ZNF177	0.0179211	0.830777	0.021404		17121776	---	0.0264084	1.18773	0.0321792
16798228	SNORD116-26	0.0179366	0.742851	0.0181748		16773681	MEDAG	0.0264184	1.30538	0.0293948
[truncated: 2,429 more rows]

## Sheet: S file 1h - Gene Ontology
Supplementary file 1h. Biological pathways associated with differential gene expression in peripheral blood mononuclear cells (PBMCs) between hydrocortisone and saline treated patients at 7 AM on the second intervention day. Right sided Fisher's exact test, P < 0.05 (equivalent to a –log (P-value) =1.3)
Canonical Pathways	-log(P-value)	Molecules
Human Embryonic Stem Cell Pluripotency	3.61	FOXO1,GAB1,S1PR1,LEF1,PDGFD,SMAD1,NOG
Sphingosine-1-phosphate Signaling	3.18	GAB1,S1PR1,PLCB1,PLCL1,PDGFD,ASAH1
Dendritic Cell Maturation	2.88	GAB1,TYROBP,LTB,PLCB1,LTBR,PLCL1,IL23A
UVA-Induced MAPK Signaling	2.72	GAB1,TIPARP,PARP8,PLCB1,PLCL1
IGF-1 Signaling	2.65	FOXO1,GAB1,IGF1R,IGFBP7,PRKAR1A
Superpathway of Inositol Phosphate Compounds	2.48	CDC25B,CD28,PTPRJ,GAB1,TRAT1,PLCB1,FIG4
iCOS-iCOSL Signaling in T Helper Cells	2.42	CD28,GAB1,CD3E,ICOS,TRAT1
Natural Killer Cell Signaling	2.38	NCR1,GAB1,TYROBP,CD300A,KLRC1
3-phosphoinositide Biosynthesis	2.28	CDC25B,CD28,PTPRJ,GAB1,TRAT1,FIG4
Crosstalk between Dendritic Cells and Natural Killer Cells	2.13	CD28,TYROBP,LTB,LTBR
CTLA4 Signaling in Cytotoxic T Lymphocytes	1.97	CD28,GAB1,CD3E,TRAT1
Glucocorticoid Receptor Signaling	1.91	GAB1,CD3E,ANXA1,NR3C2,CD163,FKBP5,TSC22D3
Axonal Guidance Signaling	1.8	DPYSL2,GAB1,CXCR4,PLCB1,PLCL1,PDGFD,ABLIM1,ARPC4,PRKAR1A
Phospholipases	1.79	PLBD1,PLCB1,PLCL1
Flavin Biosynthesis IV (Mammalian)	1.77	RFK
NF-κB Signaling	1.7	GAB1,IGF1R,IRAK3,LTBR,IGF2R
Lymphotoxin β Receptor Signaling	1.7	GAB1,LTB,LTBR
Eicosanoid Signaling	1.7	PLBD1,TBXAS1,PTGER4
Role of NFAT in Regulation of the Immune Response	1.67	CD28,GAB1,CD3E,RCAN3,PLCB1
Sperm Motility	1.64	PLBD1,PLCB1,PLCL1,PRKAR1A
Melatonin Signaling	1.63	PLCB1,PLCL1,PRKAR1A
GPCR-Mediated Integration of Enteroendocrine Signaling Exemplified by an L Cell	1.62	PLCB1,PLCL1,PRKAR1A
CD28 Signaling in T Helper Cells	1.59	CD28,GAB1,CD3E,ARPC4
14-3-3-mediated Signaling	1.58	FOXO1,GAB1,PLCB1,PLCL1
P2Y Purigenic Receptor Signaling Pathway	1.56	GAB1,PLCB1,PLCL1,PRKAR1A
BMP signaling pathway	1.55	SMAD1,NOG,PRKAR1A
Adipogenesis pathway	1.54	FOXO1,TXNIP,TCF7,SMAD1
G-Protein Coupled Receptor Signaling	1.53	P2RY13,GAB1,S1PR1,PLCB1,PTGER4,PRKAR1A
Cytotoxic T Lymphocyte-mediated Apoptosis of Target Cells	1.51	CD3E,GZMB
Uracil Degradation II (Reductive)	1.47	DPYSL2
Phenylethylamine Degradation I	1.47	ALDH2
Thymine Degradation	1.47	DPYSL2
FLT3 Signaling in Hematopoietic Progenitor Cells	1.43	GAB1,FLT3LG,FLT3
GPCR-Mediated Nutrient Sensing in Enteroendocrine Cells	1.43	PLCB1,PLCL1,PRKAR1A
Synaptic Long Term Depression	1.42	PLBD1,IGF1R,PLCB1,PLCL1
D-myo-inositol-5-phosphate Metabolism	1.42	CDC25B,PTPRJ,PLCB1,FIG4
IL-4 Signaling	1.41	GAB1,IL13RA1,NR3C2
Galactose Degradation I (Leloir Pathway)	1.37	GALT
Netrin Signaling	1.35	ABLIM1,PRKAR1A
Factors Promoting Cardiogenesis in Vertebrates	1.35	LEF1,SMAD1,NOG
Death Receptor Signaling	1.35	TIPARP,PARP8,SPTAN1
Pyruvate Fermentation to Lactate	1.3	LDHB
Ceramide Degradation	1.3	ASAH1

## Sheet: S file i - Network robustness
Supplementary file 1i. The central gene in each network module arranged in hierarchical order as ranked by network centrality score. The conectivity of each module central gene is listed (network degree) within the glucocorticoid network model (size = 2467 nodes) and compared to the interactome degree within the overall human interactome (BioGRID 3.4.137 = 21274). P-Value and odds ratio (OR) are …
	Cluster center	Network degree	Network size	Interactome degree	Interactome size	P-Value	OR
	SMAD1	117	2467	119	21274	2.2e-16	8.475
	NSFL1C	77	2467	81	21274	2.2e-16	8.19474
	LEF1	34	2467	40	21274	8.512e-15	7.32842
	TXNIP	24	2467	42	21274	2.078e-08	4.92717
	CDC25B	33	2467	34	21274	1.603e-15	8.36661
	FKBP5	93	2467	106	21274	2.2e-16	7.56407
	TP53BP1	127	2467	140	21274	2.2e-16	7.82052
	ZBTB16	113	2467	121	21274	2.2e-16	8.05072
	IGF1R	65	2467	73	21274	2.2e-16	7.67647
	GAB1	25	2467	28	21274	1.365e-11	7.69755
	FOXO1	53	2467	56	21274	2.2e-16	8.15871
	EPB41L3	93	2467	99	21274	2.2e-16	8.09815
	LDHB	128	2467	135	21274	2.2e-16	8.17347
	CYLD	58	2467	62	21274	2.2e-16	8.06451
	USP1	51	2467	57	21274	2.2e-16	7.71373
	SPTAN1	148	2467	168	21274	2.2e-16	7.59501
	PER1	27	2467	42	21274	4.168e-10	5.54292
	LTBR	69	2467	75	21274	2.2e-16	7.93123
	UBASH3A	20	2467	23	21274	2.011e-09	7.49696
	IGF2R	27	2467	30	21274	1.863e-12	7.75905
	TIRAP	40	2467	41	21274	2.2e-16	8.40982
	BMP2K	30	2467	50	21274	1.595e-10	5.17346
	DYRK2	50	2467	51	21274	2.2e-16	8.45095
	PRDM1	24	2467	31	21274	2.631e-10	6.67517
	DYNLT1	99	2467	101	21274	2.2e-16	8.44925

## Sheet: S file 1j - Causal N A
Supplementary file 1j. Causal network analysis of the differential gene expression in peripheral blood mononuclear cells (PBMCs) associated with glucocorticoid action. Master regulator = A predicted reulator, Exp.fold change = differential gene expression fold change where present, molecule type = type of regulator, activation Z score = Z-score of activation based on the known literature, P-value…
Master regulator	Exp. Fold change	Molecule type	Activation z-score	P-value of overlap
IL2		cytokine	-0.128	1.57e-11
MAFK		transcription regulator	-0.686	1.29e-10
CLNK		other	0.507	1.39e-10
Esr1-Estrogen-Fos-Jun		complex	-0.333	2.6e-10
IL2		cytokine	1.342	2.83e-10
IL15		cytokine	1.604	1.45e-09
GNRH1		other	1.234	1.49e-09
Progesterone-PGR		complex	-2.06	1.95e-09
CSK		kinase	-0.169	2.13e-09
Nrgn		other	-1.131	2.86e-09
Tlr		group	0.309	3.23e-09
MMP12		peptidase	-0.438	3.39e-09
FLT3LG	-1.402	cytokine	-0.784	8.53e-09
MMP13		peptidase	-0.447	1.44e-08
STAT4		transcription regulator	0.174	1.49e-08
IL10RB		transmembrane receptor	0.7	1.52e-08
SIM2		transcription regulator	-0.617	1.53e-08
LY96		transmembrane receptor	1.897	2.43e-08
PDLIM5		other	1.236	2.55e-08
UBE2G2		enzyme	-0.845	2.69e-08
CCL20		cytokine	1.195	3.13e-08
CaMKII		complex	-1.021	4.03e-08
PRMT2		enzyme	-0.525	4.13e-08
Ubiquitin		group	1.27	4.18e-08
HPN		peptidase	0	4.4e-08
ZNF366		transcription regulator	0.48	6.07e-08
GNRH2		other	1.147	6.73e-08
IL20		cytokine	0.152	7.76e-08
HMMR		transmembrane receptor	0	8.17e-08
PDGFRA		kinase	0	8.42e-08
LILRA2		other	-1.234	8.6e-08
KITLG		growth factor	0.164	8.62e-08
SOSTDC1		other	0.928	9.14e-08
PTPRK		phosphatase	0.186	1.13e-07
CALCA		other	0.302	1.16e-07
IL13RA2		transmembrane receptor	0.816	1.18e-07
IL13		cytokine	-0.143	1.22e-07
SRC (family)		group	-1.26	1.24e-07
IL13RA2		transmembrane receptor	-0.218	1.41e-07
SCGB3A2		other	0.59	1.42e-07
Hsp70		group	1.567	1.61e-07
UGT1A1		enzyme	0.365	1.64e-07
TG		other	-0.649	1.77e-07
APOH		transporter	-1.54	1.91e-07
Stat1-Stat3		complex	1.265	1.97e-07
Stat1/3		group	1.265	1.99e-07
IL26		cytokine	1.265	2.02e-07
Igg3		complex	0.926	2.06e-07
LCP2		other	0.186	2.15e-07
GATA3		transcription regulator	0.365	2.16e-07
RECK		other	-0.397	2.28e-07
CSF1		cytokine	1.18	2.31e-07
HMMR		transmembrane receptor	-0.408	2.43e-07
CHRNA1		transmembrane receptor	0.438	2.44e-07
USP2		peptidase	0	2.58e-07
G3BP1		enzyme	1.732	2.6e-07
PTPRJ	1.162	phosphatase	0	2.72e-07
SMARCA1		transcription regulator	-0.289	2.74e-07
SOCS5		cytokine	-0.137	2.75e-07
PGR		ligand-dependent nuclear receptor	0	2.83e-07
FOXP3		transcription regulator	1.131	2.89e-07
FGR		kinase	0.378	2.89e-07
LCK		kinase	-2.188	3.01e-07
CBLC		enzyme	-0.471	3.1e-07
Fcer1		complex	0.507	3.13e-07
HCK		kinase	-1.915	3.53e-07
IL22RA2		transmembrane receptor	-1.121	3.59e-07
S100A7		other	-0.209	3.91e-07
PTK2B		kinase	0	4.04e-07
DNAJA3		other	0.962	4.37e-07
GATA1		transcription regulator	1.265	4.48e-07
CYP27A1		enzyme	1.093	4.6e-07
TNFRSF1B		transmembrane receptor	0	4.63e-07
KLRD1		transmembrane receptor	0	4.67e-07
TREM2		transmembrane receptor	-1.095	4.71e-07
SOCS5		cytokine	-0.447	5e-07
PLG		peptidase	1.093	5.16e-07
ARRDC3		other	-0.469	5.16e-07
PTPN21		phosphatase	0.822	5.39e-07
AREG	1.866	growth factor	-0.845	5.4e-07
ACVRL1		kinase	-1.581	6.06e-07
IL12 (complex)		complex	1.206	6.13e-07
STAT3		transcription regulator	0.667	6.32e-07
CTLA4		transmembrane receptor	0.365	6.65e-07
RRM1		enzyme	0.555	6.77e-07
PROC		peptidase	0.392	6.92e-07
RPS6KA4		kinase	-1.131	6.99e-07
IL31		other	-0.2	7.09e-07
NCF1C		other	-2.412	7.18e-07
IgG		complex	0.164	7.24e-07
ETV7		transcription regulator	-0.6	7.47e-07
NEK2		kinase	-2.03	7.67e-07
Plexin B		group	0	7.69e-07
FKBP1A		enzyme	-0.943	7.91e-07
DNMT1		enzyme	0	7.92e-07
IL1R1		transmembrane receptor	1.061	7.92e-07
GHR		transmembrane receptor	0	7.92e-07
growth factor receptor		group	0	8.19e-07
ESR1		ligand-dependent nuclear receptor	-0.866	8.42e-07
LIFR		transmembrane receptor	0	8.53e-07
IQGAP1		other	0.686	8.89e-07
DDOST		enzyme	-0.535	9.2e-07
ASGR1		transmembrane receptor	0.258	9.22e-07
Tyrobp dimer		complex	-0.557	9.57e-07
ADRBK1		kinase	1	1e-06
Ifn gamma		complex	0.507	1.06e-06
ADCYAP1		other	-0.48	1.09e-06
CELA2A		peptidase	-0.149	1.11e-06
CAP1		other	-0.603	1.2e-06
NR0B1		ligand-dependent nuclear receptor	0.522	1.2e-06
ZBTB20		transcription regulator	-1.219	1.22e-06
BPI		transporter	-2.556	1.22e-06
FLT1		kinase	0.577	1.26e-06
SOCS4		other	0.229	1.26e-06
Smad		complex	0.962	1.29e-06
Ifn		group	0	1.29e-06
Growth hormone		group	-0.316	1.29e-06
SCD5		enzyme	-0.243	1.29e-06
TH2 Cytokine		group	0.378	1.29e-06
TOPORS		enzyme	0.98	1.42e-06
SRA1		transcription regulator	-1.372	1.42e-06
GP1BA		transmembrane receptor	0.973	1.46e-06
YES1		kinase	0.186	1.49e-06
VAV/TIAM		group	-0.469	1.52e-06
SOCS2		other	1.886	1.63e-06
SLPI		other	-2.263	1.66e-06
BCAR1		enzyme	0.894	1.66e-06
SMURF1		enzyme	0.714	1.69e-06
MGP		other	0.146	1.69e-06
ADAM17		peptidase	-0.6	1.75e-06
CDH1		other	1.257	1.78e-06
FGFR1		kinase	-1.808	1.78e-06
TRIM8		other	-0.98	1.79e-06
HDAC3		transcription regulator	0.522	1.81e-06
Hdac		group	-1.279	2.04e-06
Tgf beta		group	0.289	2.06e-06
F2RL1		G-protein coupled receptor	0	2.12e-06
CR1L		other	0.218	2.14e-06
IFNAR2		transmembrane receptor	1.342	2.26e-06
NR1I3		ligand-dependent nuclear receptor	0.59	2.28e-06
SH3KBP1		other	0.243	2.34e-06
CD3E	-1.247	transmembrane receptor	-0.898	2.35e-06
IL17a dimer		complex	1.236	2.35e-06
IL6ST		transmembrane receptor	-1.134	2.4e-06
RELA		transcription regulator	-1.414	2.41e-06
IL12 (family)		group	0.87	2.44e-06
IL2RG		transmembrane receptor	0.229	2.48e-06
VEGFA		growth factor	-0.152	2.51e-06
Endothelin		group	0.756	2.54e-06
HBEGF		growth factor	0	2.54e-06
LRIG1		other	-0.98	2.55e-06
STAT		group	0.626	2.57e-06
Immunoglobulin		complex	-2.111	2.6e-06
Flt3 dimer		complex	-0.378	2.64e-06
EPO		cytokine	-1.067	2.74e-06
THPO		cytokine	0	2.76e-06
MUC20		other	-0.243	2.84e-06
HPSE		enzyme	-0.392	2.89e-06
HAVCR1		other	0.686	2.9e-06
Ifi202b		other	0.962	2.91e-06
SCNN1A		ion channel	-1.093	2.91e-06
SCNN1B		ion channel	-1.093	2.94e-06
PCSK5		peptidase	0.649	3e-06
RAG2		enzyme	-0.48	3.05e-06
CBL		transcription regulator	-0.822	3.06e-06
MMP9		peptidase	0.152	3.14e-06
PITX1		transcription regulator	2.191	3.15e-06
IFNGR		complex	0	3.21e-06
AMFR		transmembrane receptor	0.343	3.22e-06
JAK		group	-0.577	3.25e-06
DUOX1		enzyme	0.688	3.25e-06
LEMD3		other	0.469	3.33e-06
PPIA		enzyme	-0.853	3.33e-06
ETS		group	0.784	3.36e-06
histone deacetylase		complex	-0.853	3.45e-06
NOS2		enzyme	1	3.62e-06
IBTK		other	1.067	3.64e-06
IFI6		other	-0.295	3.78e-06
Rac		group	0	3.79e-06
AGTR1		G-protein coupled receptor	-0.928	3.88e-06
OTUD7B		peptidase	1.605	3.97e-06
PTK2		kinase	0.169	3.99e-06
SUMO1		enzyme	1.569	4.02e-06
DNAJB4		other	1.671	4.04e-06
MOG		other	-1.155	4.06e-06
RNF41		enzyme	0.816	4.07e-06
ALB		transporter	0.539	4.08e-06
LYN		kinase	-0.557	4.09e-06
IL3RA		transmembrane receptor	-1	4.24e-06
IL12B		cytokine	0.408	4.27e-06
IL19		cytokine	-0.243	4.3e-06
MSH2		enzyme	-0.135	4.34e-06
PGR		ligand-dependent nuclear receptor	0.905	4.4e-06
EZH2		transcription regulator	0	4.4e-06
TRAIP		enzyme	1.605	4.42e-06
ITGB6		other	-0.186	4.43e-06
SORBS3		other	0	4.49e-06
PDGFB		growth factor	0.577	4.58e-06
CD300LF		other	1.131	4.59e-06
Cg		complex	0.507	4.62e-06
PCOLCE		other	-0.469	4.81e-06
PDGFRB		kinase	-0.522	4.86e-06
SH3GLB2		other	-1.155	4.89e-06
PTK6		kinase	0	4.93e-06
STAT1		transcription regulator	1.134	5.02e-06
ZFP36		transcription regulator	0	5.05e-06
USP8		peptidase	0.832	5.2e-06
p85 (pik3r)		group	-0.928	5.26e-06
SIGLEC7		transmembrane receptor	-0.557	5.33e-06
ADGRF5		G-protein coupled receptor	0.566	5.49e-06
IL9R		transmembrane receptor	0	5.53e-06
IL18		cytokine	0	5.54e-06
DUSP3		phosphatase	-1.225	5.74e-06
Pdgfr		group	-0.192	5.81e-06
WWP2		enzyme	-0.566	5.87e-06
IL7		cytokine	-1.414	5.96e-06
MMP14		peptidase	-1.414	5.99e-06
GREM1		other	-1.155	6.23e-06
NPPB		other	-0.756	6.31e-06
SPP1		cytokine	-0.469	6.33e-06
NOTCH1		transcription regulator	0.354	6.51e-06
CD80		transmembrane receptor	-0.898	6.77e-06
Nuclear factor 1		group	-1.512	6.83e-06
ERG		transcription regulator	-0.577	6.85e-06
IL-2R		complex	0.853	7.05e-06
NF2		other	0.209	7.28e-06
CD46		other	-0.5	7.31e-06
SMAD3		transcription regulator	-0.324	7.32e-06
NCOA2		transcription regulator	-0.152	7.33e-06
CYP2E1		enzyme	0.392	7.35e-06
DNMT1		enzyme	-1.569	7.35e-06
CER1		cytokine	1.177	7.46e-06
IL10R		group	-0.603	7.47e-06
SHC4		other	0.258	7.48e-06
GAS6		growth factor	-0.192	7.53e-06
ADRA2A		G-protein coupled receptor	0.218	7.63e-06
HSD11B2		enzyme	-2.324	7.66e-06
NRP1		transmembrane receptor	0	7.81e-06
GAB1	1.259	kinase	0.365	7.97e-06
POMC		other	2.401	8.04e-06
BEX3		other	-1.857	8.04e-06
FKBP1B		enzyme	1	8.17e-06
TEK		kinase	-0.894	8.39e-06
XDH		enzyme	-0.539	8.49e-06
IL5RA		transmembrane receptor	0.707	8.52e-06
IFNE		cytokine	0.816	8.52e-06
SERPINB4		other	0.822	8.6e-06
Syndecan		group	-0.354	8.62e-06
CARD10		other	-0.885	8.98e-06
CTNNBIP1		other	-0.447	9.03e-06
CD24		other	-0.209	9.05e-06
estrogen receptor		group	0	9.1e-06
PLD2		enzyme	0	9.31e-06
ADRB2		G-protein coupled receptor	-0.164	9.43e-06
NLR		group	-1.265	9.56e-06
BMP		group	-0.894	9.67e-06
IL5		cytokine	-0.898	9.9e-06
Igh (family)		group	0.365	9.92e-06
NKX2-5		transcription regulator	1.043	9.93e-06
CDK5-p25		complex	0.169	1.02e-05
CEACAM1		other	0.577	1.02e-05
G protein beta gamma		complex	-0.6	1.04e-05
SPINK7		other	-0.169	1.05e-05
Casp12		peptidase	0.762	1.06e-05
Igm		complex	1.177	1.07e-05
USP11		peptidase	-1.443	1.07e-05
Fc gamma receptor		group	-0.577	1.09e-05
DES		other	-0.132	1.1e-05
OSMR		transmembrane receptor	-1	1.1e-05
NAMPT		cytokine	-0.6	1.13e-05
Mmp		group	0.649	1.14e-05
TH17 Cytokine		group	0	1.15e-05
SERPINB1		other	0.973	1.16e-05
GAB2		other	0.756	1.16e-05
GNGT1		enzyme	-1.857	1.17e-05
PLAUR		transmembrane receptor	0.218	1.2e-05
ITGB3		transmembrane receptor	-0.16	1.21e-05
PRDM1	1.445	transcription regulator	1.508	1.22e-05
NFAT (complex)		complex	-0.801	1.26e-05
IRF		group	0.164	1.27e-05
FCGR2B		transmembrane receptor	0.655	1.28e-05
IL21		cytokine	-0.577	1.3e-05
SERP1		other	-0.16	1.31e-05
CDK5R2		other	0.169	1.32e-05
IRAK1BP1		other	-1.474	1.32e-05
15-LOX		group	-0.894	1.32e-05
ELF3		transcription regulator	0.258	1.33e-05
RGS12		other	0.845	1.33e-05
F9		peptidase	-0.928	1.33e-05
Angiotensin II receptor type 1		group	-0.5	1.36e-05
SLC6A3		transporter	-0.169	1.39e-05
ZIC1		transcription regulator	-0.447	1.39e-05
TICAM1		other	-2.401	1.44e-05
TCF7	-1.359	transcription regulator	-0.535	1.45e-05
KNG1		other	-0.18	1.48e-05
CD44		enzyme	-1.342	1.49e-05
ARRB1		other	-0.186	1.51e-05
BCR (complex)		complex	-0.378	1.51e-05
USP2		peptidase	0.471	1.53e-05
TGFA		growth factor	0.18	1.53e-05
G-protein gamma		group	-0.229	1.56e-05
PLAU		peptidase	0.343	1.56e-05
CD28	-1.377	transmembrane receptor	1.093	1.57e-05
INSR		kinase	-0.962	1.57e-05
KRAS		enzyme	-1.567	1.58e-05
ADAM9		peptidase	0	1.6e-05
IRF4		transcription regulator	1.528	1.61e-05
Tnfsf9		other	-0.365	1.61e-05
signal peptidase		complex	-1.567	1.62e-05
CTTN		other	0.5	1.65e-05
Nfatc		group	-0.973	1.66e-05
USP10		peptidase	0.98	1.75e-05
CD244		transmembrane receptor	-0.218	1.8e-05
DMRT1		transcription regulator	-0.333	1.81e-05
PTPRB		phosphatase	-0.962	1.83e-05
IL17A		cytokine	0.169	1.84e-05
WIF1		other	1.347	1.9e-05
BMPER		other	-1.155	1.91e-05
CYP1B1		enzyme	0	1.94e-05
ADRA1D		G-protein coupled receptor	-0.5	1.95e-05
Tnf receptor		group	0.365	1.98e-05
PTPN6		phosphatase	0.617	1.99e-05
G-protein beta		group	-0.229	1.99e-05
IL27RA		transmembrane receptor	-0.229	1.99e-05
UBE2E2		enzyme	1.732	2e-05
PDGF BB		complex	-1.947	2e-05
IFN type 1		group	0.655	2.01e-05
CCND3		other	0.729	2.04e-05
CD247		transmembrane receptor	-0.728	2.06e-05
RGS3		other	0.853	2.08e-05
Lfa-1		complex	0.535	2.09e-05
S100a7a		other	-1	2.16e-05
Fc receptor		group	-1.147	2.17e-05
FGF21		growth factor	-1.46	2.17e-05
RAP1GDS1		other	-1.234	2.23e-05
CMKLR1		G-protein coupled receptor	1.26	2.24e-05
EBI3		cytokine	-0.218	2.24e-05
SLIRP		other	1.134	2.25e-05
CD9		other	0.5	2.25e-05
IL10RA		transmembrane receptor	0.894	2.29e-05
CSF		group	0.258	2.33e-05
C/ebp		group	0	2.34e-05
FUT8		enzyme	-0.5	2.35e-05
NLRC4		other	-1.441	2.35e-05
FSH		complex	1.667	2.36e-05
TNFRSF13C		transmembrane receptor	-0.135	2.37e-05
PI3		other	1.313	2.43e-05
TNFSF4		cytokine	-1.769	2.47e-05
ITSN1		other	-1.606	2.49e-05
STAT6		transcription regulator	0.392	2.5e-05
WNT3A		cytokine	-2.353	2.56e-05
Fibrinogen		complex	-0.6	2.57e-05
ADAMTS1		peptidase	0.756	2.63e-05
FHIT		enzyme	-0.135	2.65e-05
PTPN2		phosphatase	-0.378	2.66e-05
IL4		cytokine	-0.617	2.67e-05
JAK2		kinase	-0.822	2.68e-05
TNFRSF12A		transmembrane receptor	-1.372	2.69e-05
CD38		enzyme	-0.426	2.71e-05
EIF2AK1		kinase	-1.474	2.71e-05
IFNG		cytokine	-0.209	2.72e-05
SETDB1		enzyme	0.392	2.73e-05
FLOT1		other	0.5	2.81e-05
RUVBL2		transcription regulator	-1.18	2.82e-05
LASP1		transporter	-1.069	2.83e-05
GDNF		growth factor	0.209	2.84e-05
HIF1AN		enzyme	-1.896	2.84e-05
ACKR3		G-protein coupled receptor	-0.243	2.85e-05
TYROBP	1.144	transmembrane receptor	-1.279	2.88e-05
IL11		cytokine	-0.209	2.88e-05
VAV1		transcription regulator	-0.186	2.89e-05
CCDC88A		other	0	2.89e-05
LAT		kinase	0.2	2.89e-05
CD5		transmembrane receptor	0.229	2.89e-05
PTH		other	-0.522	2.96e-05
FOXO1	-1.122	transcription regulator	3	3e-05
PPP2R5B		phosphatase	0.277	3.03e-05
ZNF335		other	-0.2	3.04e-05
PRLR		transmembrane receptor	-0.174	3.05e-05
EGR2		transcription regulator	0.655	3.08e-05
IL10RB		transmembrane receptor	0	3.1e-05
BAG1		other	-1.671	3.13e-05
VAV2		transcription regulator	-1.043	3.13e-05
CISH		other	0.894	3.15e-05
PNMT		enzyme	1	3.16e-05
PIK3R2		kinase	0.229	3.19e-05
ALOX5		enzyme	-0.801	3.2e-05
TAL1		transcription regulator	0	3.21e-05
EDN1		cytokine	0.905	3.27e-05
ZC3HAV1		other	-1.021	3.27e-05
TGFBR3		kinase	0.535	3.36e-05
NPPA		other	-0.192	3.36e-05
NGFR		transmembrane receptor	-0.343	3.38e-05
KLF10		transcription regulator	0.365	3.49e-05
SP4		transcription regulator	-0.289	3.52e-05
FGF19		growth factor	-0.728	3.55e-05
PLPP3		phosphatase	-1.342	3.56e-05
Integrin		complex	0	3.61e-05
PPM1E		phosphatase	0.667	3.61e-05
TFF3		other	0	3.61e-05
Plk		group	-1.291	3.71e-05
KCND2		ion channel	-0.775	3.71e-05
CD80/CD86		group	-1.508	3.71e-05
Atrial Natriuretic Peptide		group	-0.258	3.79e-05
IL23A	-1.519	cytokine	0	3.82e-05
Pdgf (complex)		complex	-0.905	3.87e-05
Prl3d1 (includes others)		other	-0.535	3.88e-05
B2M		transmembrane receptor	-0.18	3.9e-05
Calcineurin A-Calcineurin B-Runx1		complex	-0.333	3.93e-05
IGF2R	1.199	transmembrane receptor	-0.756	3.98e-05
KHDRBS1		transcription regulator	0	3.99e-05
EPHA2		kinase	-0.209	3.99e-05
TH17 Cytokine		group	0.577	3.99e-05
ADRA1		group	-0.243	4.03e-05
Ggt		group	-1.64	4.03e-05
SNIP1		other	1.342	4.07e-05
RET		kinase	-0.169	4.07e-05
OPRM1		G-protein coupled receptor	0.447	4.09e-05
USP43		other	-1.342	4.1e-05
ZC3H18		other	-1.342	4.1e-05
TNPO2		transporter	-1.342	4.1e-05
CTF1		cytokine	-0.6	4.12e-05
CDK5		kinase	0.343	4.19e-05
IFNGR1		transmembrane receptor	0.426	4.22e-05
CCKBR		G-protein coupled receptor	-0.728	4.25e-05
Cr3		complex	-0.277	4.25e-05
PTPRD		phosphatase	0.832	4.25e-05
ST3GAL1		enzyme	-1.342	4.3e-05
ICOS	-1.325	transmembrane receptor	0.218	4.32e-05
TIAM1		other	0.243	4.33e-05
AMOTL1		other	-1.64	4.33e-05
TRIM21		enzyme	0.152	4.34e-05
CD40		transmembrane receptor	-0.469	4.44e-05
CSNK1E		kinase	0.365	4.46e-05
CSRP3		other	-1.061	4.48e-05
CHRM2		G-protein coupled receptor	-0.218	4.51e-05
ROCK2		kinase	-0.6	4.55e-05
ANXA4		other	1.406	4.56e-05
MST1R		kinase	-0.209	4.56e-05
C3AR1		G-protein coupled receptor	-1.938	4.57e-05
IL27		cytokine	1.225	4.59e-05
NFKB1		transcription regulator	1	4.59e-05
AMIGO2		other	0	4.61e-05
EFNA1		other	0	4.71e-05
GALNT2		enzyme	0	4.72e-05
FLT4		transmembrane receptor	-0.5	4.73e-05
UCHL5		peptidase	-1.234	4.74e-05
PECAM1		other	0	4.76e-05
MET		kinase	-0.378	4.81e-05
TNFRSF8		transmembrane receptor	-0.655	4.85e-05
KDR		kinase	-0.577	4.88e-05
IFNA4		cytokine	1.091	4.92e-05
MYB		transcription regulator	0	4.93e-05
NTF3		growth factor	0	4.95e-05
GNRH		group	0.928	4.96e-05
ARRB2		other	0.333	4.99e-05
ALDH1A2		enzyme	0.944	5.02e-05
FN1		enzyme	0	5.07e-05
GMFB		growth factor	-1.896	5.08e-05
FGFR4		kinase	0	5.09e-05
SMARCA1		transcription regulator	0.707	5.1e-05
chemokine		group	0.894	5.2e-05
IFNL3		other	-0.229	5.24e-05
CEBPA		transcription regulator	-0.853	5.25e-05
FOXM1		transcription regulator	0	5.25e-05
HSP90AB1		enzyme	-0.5	5.29e-05
TFRC		transporter	1.18	5.3e-05
Glucocorticoid-GCR-DHT-AR		complex	0.784	5.31e-05
IL12 (complex)		complex	0	5.32e-05
NOTCH4		transcription regulator	-0.429	5.33e-05
ANXA1	1.235	enzyme	0.218	5.43e-05
IFNAR1		transmembrane receptor	1.342	5.44e-05
CTSG		peptidase	-1.461	5.5e-05
TRAF2-TRAF5		complex	0.469	5.55e-05
IL21		cytokine	0	5.55e-05
CXCR2		G-protein coupled receptor	0.471	5.59e-05
KCNIP3		transcription regulator	-1.333	5.61e-05
IL20RA		transmembrane receptor	-0.258	5.66e-05
Ifnz (includes others)		cytokine	0	5.72e-05
GC-GCR dimer		complex	1.961	5.76e-05
TRPC1		ion channel	0.258	5.88e-05
IFNA2		cytokine	0.73	5.91e-05
ATF6		transcription regulator	0	5.93e-05
PTPN9		phosphatase	0	5.96e-05
CXCL8		cytokine	-0.522	6.01e-05
ITK		kinase	0.2	6.01e-05
Stat1-Stat3		complex	0.277	6.02e-05
C5		cytokine	-0.756	6.06e-05
CYCS		transporter	-2.359	6.07e-05
TRIM25		transcription regulator	-1.64	6.12e-05
Stat1/3		group	0.277	6.16e-05
SPARC		other	0.2	6.23e-05
CREB-NFkB		complex	-1.265	6.23e-05
TNIP1		other	1.508	6.25e-05
BNIP2		other	-1.581	6.29e-05
IL26		cytokine	0.277	6.3e-05
ITGB2		transmembrane receptor	-1	6.3e-05
NTRK3		kinase	0.392	6.32e-05
SERPINC1		enzyme	-0.218	6.34e-05
HSPD1		enzyme	-1	6.38e-05
TNFSF13B		cytokine	-0.192	6.4e-05
IL6R		transmembrane receptor	-0.218	6.43e-05
PRDX3		enzyme	-1.938	6.46e-05
BUB1		kinase	-0.962	6.47e-05
CYP27A1		enzyme	0	6.48e-05
TNFRSF11A		transmembrane receptor	-0.426	6.51e-05
ATP6AP2		transporter	-0.408	6.52e-05
ITGAV		ion channel	0	6.59e-05
IFNL2		other	-0.229	6.6e-05
PPP2R5E		phosphatase	0	6.74e-05
HTRA1		peptidase	-1.387	6.74e-05
LGALS9		other	-1.206	6.75e-05
RNASE2		enzyme	-0.243	6.79e-05
Oct1/2		group	1.569	6.85e-05
Ras		group	-0.146	6.88e-05
TIMP2		other	-1.387	6.89e-05
CAMK4		kinase	-0.557	6.89e-05
TNF		cytokine	0.192	6.91e-05
ETS1		transcription regulator	1.213	7.02e-05
IL13RA1	1.814	transmembrane receptor	0.535	7.04e-05
TNFSF15		cytokine	-0.655	7.08e-05
OSM		cytokine	0.822	7.14e-05
CASP10		peptidase	-2.064	7.2e-05
ID2		transcription regulator	-1.633	7.23e-05
Vacuolar H+ ATPase		complex	0.577	7.31e-05
mediator		complex	1.257	7.31e-05
SMURF2		enzyme	-1.372	7.36e-05
TGFBR2		kinase	0	7.4e-05
HTATIP2		transcription regulator	-0.775	7.41e-05
SERPINA1		other	0.816	7.45e-05
DYNLL1		other	-1.3	7.49e-05
VWC2		other	-0.164	7.58e-05
Adaptor protein 2		complex	0	7.59e-05
PLCG2		enzyme	-0.6	7.61e-05
TCF/LEF		group	0	7.72e-05
TRB		transmembrane receptor	-0.218	7.79e-05
MATK		kinase	0.905	7.9e-05
HGS		other	0	8e-05
Raf		group	0.522	8.12e-05
TNFSF10		cytokine	0	8.13e-05
CSF3		cytokine	-0.557	8.14e-05
ELANE		peptidase	-0.392	8.21e-05
TEX11		other	-0.535	8.28e-05
GRN		growth factor	-0.5	8.29e-05
NEU2		enzyme	1.508	8.33e-05
PTGER2		G-protein coupled receptor	0.655	8.34e-05
UHMK1		kinase	-1.474	8.34e-05
B-cell receptor		complex	-1.043	8.45e-05
KIT		transmembrane receptor	-0.218	8.45e-05
PTGDR		G-protein coupled receptor	-1.18	8.46e-05
SYK		kinase	-0.18	8.47e-05
RTKN		other	-1.18	8.52e-05
NFkB (complex)		complex	-1.508	8.54e-05
Collagen(s)		complex	0.853	8.57e-05
TMF1		transcription regulator	-0.258	8.61e-05
NEU1		enzyme	-1.155	8.65e-05
CCL2		cytokine	-0.962	8.7e-05
IFNL1		cytokine	-0.229	8.77e-05
IGF2		growth factor	0.343	8.9e-05
ADRB1		G-protein coupled receptor	0.218	9.04e-05
PDGFD	1.302	growth factor	-0.277	9.16e-05
CD274		enzyme	0.277	9.16e-05
FGF1		growth factor	-0.192	9.18e-05
REN		peptidase	0	9.2e-05
C1D		transcription regulator	-0.156	9.26e-05
Gm-Csf Receptor		complex	0.258	9.27e-05
NRTN		growth factor	-0.728	9.29e-05
BMP4		growth factor	0.962	9.38e-05
SMAD2-SMAD4-TOB		complex	0.507	9.48e-05
CTSD		peptidase	-0.365	9.49e-05
LRPAP1		transmembrane receptor	0.535	9.52e-05
FRS2		kinase	-0.535	9.52e-05
C1QBP		transcription regulator	0.218	9.53e-05
CTNNβ-LEF1		complex	0.469	9.63e-05
S1PR		group	-1.508	9.74e-05
LTBP3		other	-1.508	9.74e-05
GRIN2C		ion channel	-1.567	9.76e-05
AXL		kinase	-0.756	9.78e-05
BECN1		other	-0.688	0.000101
ARTN		growth factor	0	0.000102
YWHAH		transcription regulator	1	0.000102
FCGR2A		transmembrane receptor	0.626	0.000103
IFNA5		cytokine	1.147	0.000104
IFNA6		cytokine	1.147	0.000104
CCL3		cytokine	0	0.000105
CX3CL1		cytokine	0.426	0.000105
GNAI2		enzyme	0	0.000106
Iga		complex	0	0.000106
Calcineurin protein(s)		complex	-1.257	0.000107
MPL		transmembrane receptor	-0.775	0.000107
MEF2		group	0.894	0.000108
MRAS		enzyme	-0.218	0.000109
NRIP1		transcription regulator	0	0.000111
CR2		transmembrane receptor	-0.258	0.000111
NOS3		enzyme	0	0.000112
TEC/BTK		group	0.365	0.000112
FBLIM1		other	1.265	0.000112
SOX11		transcription regulator	-0.781	0.000112
CCK		other	0.378	0.000113
IFNGR2		transmembrane receptor	0.277	0.000113
HTR2A		G-protein coupled receptor	0.905	0.000113
FABP4		transporter	-1.147	0.000114
Interferon alpha		group	0.507	0.000115
PTPN12		phosphatase	-0.73	0.000116
ADRA1A		G-protein coupled receptor	-1	0.000117
SFRP1		transmembrane receptor	-1.213	0.000118
THBS1		other	-1.257	0.000119
AGTRAP		G-protein coupled receptor	0.577	0.00012
NTRK2		kinase	-1	0.000122
IL17a dimer		complex	1.155	0.000122
CTLA4		transmembrane receptor	-1.342	0.000123
GH1		growth factor	0.174	0.000123
FGFR2		kinase	1.043	0.000125
ADAM15		peptidase	0.535	0.000127
IL22RA2		transmembrane receptor	-0.277	0.000128
BMP2		growth factor	0.333	0.000129
PIK3CG		kinase	0.2	0.00013
STAT3/5		group	-0.277	0.000131
LAG3		transmembrane receptor	-0.302	0.000132
IRAK3	1.463	kinase	0.447	0.000132
ZBTB17		transcription regulator	-1.732	0.000132
KISS1		other	-0.5	0.000133
Muscarinic cholinergic receptor		group	0.832	0.000134
EFNB1		other	-0.728	0.000134
CNTF		cytokine	-0.378	0.000136
TLR9		transmembrane receptor	-0.365	0.000136
CAMK2A		kinase	-0.378	0.000137
LTBP1		other	0.302	0.000138
Glucocorticoid-GCR		complex	1.8	0.000139
ID3		transcription regulator	-1.633	0.000139
MMP8		peptidase	0.277	0.000139
VCAM1		transmembrane receptor	0	0.000139
ODC1		enzyme	-0.243	0.00014
IFNA1/IFNA13		cytokine	0.816	0.00014
Ins1		other	-1.021	0.000141
Fgfr		group	0.2	0.000142
Vegf		group	0.277	0.000142
ETV6		transcription regulator	-0.277	0.000142
AHR		ligand-dependent nuclear receptor	1.219	0.000142
SCARB1		transporter	0	0.000143
PPARGC1B		transcription regulator	0	0.000144
PRKG2		kinase	0	0.000145
RNF40		enzyme	0.302	0.000145
ITGAM		transmembrane receptor	-0.626	0.000145
LINGO1		other	-1.155	0.000146
2003-03-14		group	0.258	0.000148
AGK		kinase	0.277	0.000148
NCK1		kinase	0	0.000148
MVP		other	0.632	0.000148
Nodal receptor		complex	-0.756	0.000148
Hsp27		group	0.522	0.000149
MAGI3		kinase	0	0.000149
TRAF2/3/5		group	1.347	0.00015
RUNX1		transcription regulator	-0.365	0.000151
IL4R		transmembrane receptor	0.229	0.000151
FCGR1A		transmembrane receptor	-1.5	0.000152
PTPN11		phosphatase	-1.095	0.000152
ANGPTL1		other	0.302	0.000152
INSIG1		other	1.177	0.000153
PARM1		other	-0.277	0.000154
SOD2		enzyme	1.043	0.000154
APOA2		transporter	0.655	0.000156
VTCN1		other	0	0.000156
PTP4A2		phosphatase	-0.302	0.000156
NECTIN1		other	0	0.000156
CD81		other	0	0.000156
ETK1/2		group	-0.192	0.000157
RNF31		enzyme	1.177	0.000157
PDCD1		phosphatase	-0.775	0.000158
FCER1G		transmembrane receptor	0.426	0.000162
UBASH3A	-1.319	enzyme	0	0.000162
PROK2		other	-0.277	0.000163
KLB		enzyme	-0.832	0.000163
IFN Beta		group	1	0.000163
ALK		kinase	-0.688	0.000166
CTNNB1		transcription regulator	0.632	0.000167
STAT3		transcription regulator	-0.302	0.000168
Smad1/5/8-Smad4		complex	0.354	0.000168
LIMK1		kinase	0.218	0.000168
SNW1		transcription regulator	-1.225	0.000168
FGF18		growth factor	0	0.000168
ST13		other	2.333	0.000169
PLCB1	1.565	enzyme	-1.291	0.000169
RANBP9		other	0.258	0.000169
KSR1		kinase	-0.218	0.00017
PTPRC		phosphatase	-0.784	0.000171
Collagen type IV		complex	0.775	0.000172
ZIC2		transcription regulator	0	0.000173
MIF		cytokine	1.633	0.000173
PRMT2		enzyme	-0.816	0.000176
Fcgr2		group	0	0.000178
RGCC		other	-0.822	0.000179
c-Src		group	0.229	0.000183
GRIP1		transcription regulator	-0.209	0.000183
C1GALT1C1		other	-0.302	0.000184
PDGF-AA		complex	-0.243	0.000187
BAD		other	0.258	0.000191
TREM1		transmembrane receptor	0.471	0.000191
IRF8		transcription regulator	0	0.000191
Retnla		other	0.557	0.000193
PPP1R2		phosphatase	-0.378	0.000199
CHAF1A		other	0.378	0.000199
ADAM28		peptidase	-0.186	0.000205
CD82		other	-1.213	0.000205
EPHB4		kinase	1.069	0.000205
MLK1/2/3		group	0	0.000207
Ubiquitin		group	0.928	0.000208
HDAC7		transcription regulator	0.6	0.000209
PPP2R2C		phosphatase	-0.5	0.000209
LRP4		other	2.5	0.000209
STAT5A		transcription regulator	-0.973	0.000211
acid phosphatase		group	1.279	0.000213
PROK1		growth factor	0.535	0.000213
MAP3K5		kinase	1.768	0.000214
OTUB1		enzyme	-0.87	0.000215
CD14		transmembrane receptor	2.335	0.000216
CLEC7A		transmembrane receptor	0	0.000216
PDCD10		other	0.333	0.000221
P2RY6		G-protein coupled receptor	-0.775	0.000221
ATG16L1		enzyme	-0.258	0.000221
Laminin		complex	-0.2	0.000222
NCAM1		other	-1.147	0.000226
PELI2		other	-0.258	0.000229
INS		other	-0.169	0.000231
MST1		growth factor	-0.655	0.000231
ANGPT2		growth factor	0.539	0.000232
CTGF		growth factor	-0.18	0.000232
NPPB		other	-0.378	0.000234
GNB1		enzyme	0.229	0.000235
EED		transcription regulator	-1.265	0.000237
Rock		group	-1.095	0.000245
PRDX2		enzyme	1.528	0.000245
PRDM1	1.445	transcription regulator	0.707	0.000247
PLEKHO1		other	-0.5	0.000247
PTPRE		phosphatase	0.229	0.000248
CSF2		cytokine	-0.905	0.000248
GC-GCR dimer		complex	1.732	0.000254
AGPAT2		enzyme	0.728	0.000255
PPME1		enzyme	-0.775	0.000256
FCER1A		transmembrane receptor	-0.6	0.000257
GDF2		growth factor	-1.604	0.000258
LAMC2		other	1.069	0.000258
FSCN1		other	0	0.000262
TNFRSF11B		transmembrane receptor	-1.698	0.000262
ERBB		group	1.069	0.000262
MTCH2		other	1.134	0.000263
SULF1		enzyme	1.213	0.000266
LOX		enzyme	1.091	0.000266
VIM		other	-0.5	0.000271
TRAF		group	-0.688	0.000275
TAC4		other	-0.688	0.000275
ALDH1A2		enzyme	0.333	0.000277
CRP		other	0.243	0.000277
Dexamethasone-GR		complex	2.6	0.000279
LY9	-1.21	other	-0.707	0.000281
HSP90AA1		enzyme	0.6	0.000285
CXCR1		G-protein coupled receptor	-1.291	0.000291
MAP3K		group	1.789	0.000292
NTRK1		kinase	-0.73	0.000295
GNG2		enzyme	0.471	0.000296
CCL20		cytokine	1.5	0.000296
PLAT		peptidase	-0.816	0.000298
Mre11		group	-0.898	0.000298
STK26		kinase	-0.707	0.0003
EGFR		kinase	1	0.000301
SERPINB8		other	-0.186	0.000303
HGF		growth factor	0.905	0.000309
PTPase		group	0	0.00031
AXIN1		other	0.756	0.00031
ZP3		transporter	-1.134	0.00031
LPAR2		G-protein coupled receptor	-0.832	0.000311
YAP/TAZ		group	-0.243	0.000315
IL4		cytokine	0.535	0.000316
Cebp		complex	0.535	0.000316
GPS2		transcription regulator	0.277	0.000317
FGF4		growth factor	0.894	0.000317
MGEA5		enzyme	0	0.000324
ARHGAP32		other	0.577	0.000328
EPHB6		kinase	0.832	0.000328
HOXB7		transcription regulator	1.387	0.000328
Klra1 dimer		complex	-0.832	0.000328
CITED1		transcription regulator	-1.091	0.000329
COL18A1		other	-0.408	0.00033
CSF1R		kinase	0.447	0.000333
ACTN2		transcription regulator	-1.043	0.000336
SHC1		other	0.408	0.000337
PPP2R1A		phosphatase	0.471	0.000338
BUB3		other	-1.177	0.000338
XBP1		transcription regulator	0.18	0.000338
ROCK1		kinase	-0.655	0.00034
Lh		complex	0.2	0.000344
WWOX		enzyme	0.229	0.000345
ASIP		other	-0.728	0.000347
farnesyl transferase		complex	-0.156	0.000348
NBN		other	-0.962	0.000348
SULT1A1		enzyme	0.894	0.000349
RGS2		other	-0.302	0.000352
NFATC4		transcription regulator	-1.091	0.00036
SPINT2		other	0.707	0.000362
Hip1-Ift57		complex	-0.408	0.000362
Beta Arrestin		group	-0.905	0.000367
CNR2		G-protein coupled receptor	0.302	0.000367
SH2D1B		other	2.324	0.000368
TSC22D3	1.857	transcription regulator	0.577	0.000368
FGF7		growth factor	0.853	0.000374
PIM1		kinase	-0.962	0.000382
UBE2H		enzyme	0.667	0.000383
SNCG		other	-0.471	0.000385
IL1RL1		transmembrane receptor	0.471	0.000385
PSMC5		transcription regulator	1.091	0.000386
RXRG		ligand-dependent nuclear receptor	-1.298	0.00039
DEF6		other	0	0.000393
Lectin		group	-0.632	0.000402
RASSF1		other	-0.728	0.000403
MEMO1		other	-0.853	0.000403
PDCD6IP		other	1	0.000405
BTK		kinase	0.756	0.000407
RLN2		other	0	0.000411
NOX1		ion channel	0.277	0.00042
MGP		other	1	0.000424
BGN		other	0	0.000426
CAMK2N1		kinase	0.577	0.000428
SH2D1A		other	-0.577	0.000428
ICOSLG/LOC102723996		other	-0.728	0.000431
RHOC		enzyme	0	0.000432
GZMH		peptidase	0.209	0.000432
CAPN1		peptidase	0.243	0.000437
MAP3K11		kinase	0	0.000439
NUMB/NUMBL		group	0.784	0.000441
S100A9		other	-0.894	0.000442
MTMR6		phosphatase	1.508	0.000442
CCND3		other	-0.243	0.000443
Relaxin		group	-0.577	0.000445
Pld		group	0	0.000446
UBE2M		enzyme	1.091	0.000446
C3		peptidase	0.243	0.000449
Lefty		group	0.6	0.000453
RHOG		enzyme	0.577	0.000462
PLD1		enzyme	0	0.000463
UBXN1		other	0.277	0.000474
HOXD10		transcription regulator	-0.192	0.00048
PC-PLC		group	0.632	0.000482
CSPG4		other	0	0.000482
SUFU		transcription regulator	-1	0.000484
ZAP70		kinase	-0.218	0.000487
MAP4K5		kinase	0	0.00049
MMP1		peptidase	-1.069	0.000498
FOXP3		transcription regulator	0.243	0.000505
DOK2		other	0	0.000506
TR-RXR		complex	0.853	0.00051
TNFSF14		cytokine	-0.728	0.000512
NFE2		transcription regulator	1.4	0.000518
NCOA7		transcription regulator	-1.147	0.000521
GRB2		kinase	0	0.000522
IL17F		cytokine	-0.535	0.00053
CD19		transmembrane receptor	0.2	0.000532
FAM160B2		other	-1	0.000533
CDK4		kinase	-0.577	0.000535
IL17B		cytokine	-0.943	0.000535
IL6		cytokine	1.387	0.000542
TNFSF12		cytokine	0	0.00055
RASSF1		other	-0.447	0.000551
HTR1B		G-protein coupled receptor	0.277	0.000552
F7		peptidase	-1.091	0.000555
ADRBK2		kinase	0.277	0.000561
glycogen phosphorylase		group	0.943	0.000562
CEBPA		transcription regulator	0.632	0.000562
PKN1		kinase	-1.043	0.000563
NEK1		kinase	0.209	0.000563
TRAF4		other	-0.2	0.000563
TNIK		kinase	1.604	0.000564
HMGCR		enzyme	-1.147	0.000566
CSNK1G2		kinase	1.147	0.000566
PDCD1		phosphatase	-2	0.000566
DUSP10		phosphatase	-1.569	0.000571
S100A4		other	-0.209	0.00058
GNB2		enzyme	-0.258	0.000584
TAB3		other	0.229	0.0006
WBSCR22		enzyme	1.414	0.000615
RTN4R		other	-0.302	0.00062
DGCR8		enzyme	1.213	0.000629
ITGA7		other	-0.302	0.000632
PPARGC1A		transcription regulator	0.801	0.000635
PIP5K1B		kinase	1.155	0.000639
RHOH		enzyme	0.258	0.000645
ARNT		transcription regulator	-1.46	0.000647
Iti		complex	0.192	0.000649
ACP1		phosphatase	1.414	0.00065
BDKRB1		G-protein coupled receptor	0	0.00065
SULF2		enzyme	0.632	0.000654
FURIN		peptidase	0.209	0.000654
NT5E		phosphatase	-0.707	0.000664
CAMP		other	-0.655	0.000665
ERG		transcription regulator	-0.218	0.000665
VDR		transcription regulator	-0.229	0.000666
HABP2		peptidase	0.277	0.000671
Ptch-Shh		complex	1.633	0.000672
NCOA4		transcription regulator	-0.209	0.000673
DPP4	-1.223	peptidase	-0.243	0.000679
ROBO 1/2		group	-0.5	0.000679
PDLIM2		other	-1.671	0.000679
PAK1		kinase	0	0.000683
TBXA2R		G-protein coupled receptor	0.258	0.000692
NR3C1		ligand-dependent nuclear receptor	1.521	0.000698
C5AR1		G-protein coupled receptor	0.209	0.0007
LRRFIP1		other	-1	0.000707
PRNP		other	0.192	0.000707
ERBIN		other	0	0.000719
Pdgf Ab		complex	0.688	0.000721
IL-1R		group	0	0.000723
LGR4		transmembrane receptor	0.408	0.000725
NOS1		enzyme	0.894	0.000731
RGS16		other	-0.258	0.000732
EMILIN1		other	1.155	0.000734
TCF7L2		transcription regulator	1.387	0.000739
PPP1R15B		phosphatase	0.728	0.000741
NODAL		growth factor	-0.905	0.00075
MAP2K2		kinase	0.243	0.00075
NR1H4		ligand-dependent nuclear receptor	0.447	0.000755
VEGFC		growth factor	-1.069	0.000763
TSLP		cytokine	-2	0.000764
BRCA1		transcription regulator	0	0.000766
CD5		transmembrane receptor	0	0.000768
Il15r		complex	-0.728	0.000769
TICAM2		other	-0.243	0.000769
Hd-Map3k10		complex	-0.186	0.000774
CNKSR1		other	0.333	0.000781
MECOM		transcription regulator	0	0.000786
IL10R		group	0.832	0.000787
FNG		group	-0.277	0.000787
GLP1R		G-protein coupled receptor	0.905	0.000793
ARAF		kinase	-0.5	0.000795
LCN2		transporter	-1	0.000798
TDGF1		growth factor	0.535	0.000809
IRAK2		kinase	0	0.000814
NLRP12		other	0	0.000816
TCF7L2		transcription regulator	1	0.000818
KSR2		kinase	0	0.000821
AKR1B1		enzyme	1.061	0.000821
FAM120A		other	0.632	0.000821
IL18R1		transmembrane receptor	0.5	0.000837
PLA2G2A		enzyme	0	0.000845
TOLLIP		other	0	0.000848
RAP1GAP		other	-0.243	0.000848
RAB7B		peptidase	0.943	0.000863
TRAF5		transporter	0.655	0.000871
CDH5		other	0.535	0.000883
Klra7 (includes others)		transmembrane receptor	-0.577	0.000885
DGKA	-1.186	kinase	0.728	0.00089
TMEFF2		other	-1	0.000895
FGFR3		kinase	-0.535	0.000908
PELP1		other	-0.894	0.000915
TRIB3		kinase	0.243	0.000923
CAPN2		peptidase	0.192	0.000927
MMP3		peptidase	0.632	0.000927
SNAI2		transcription regulator	-0.632	0.000927
NOX5		ion channel	-0.707	0.000935
LCP1		other	0	0.000935
ID1		transcription regulator	0.894	0.000944
TRPC6		ion channel	-0.577	0.000945
Actin		group	-0.408	0.000947
CD3-TCR		complex	-0.832	0.000948
HTT		transcription regulator	-0.557	0.000959
STK24		kinase	-0.707	0.000959
VLDLR		transporter	0	0.000959
TGFBR1		kinase	-1.606	0.000973
KLRB1		transmembrane receptor	-0.333	0.000979
PBK		kinase	-1.886	0.00099
ZBED6		other	1.732	0.000991
JINK1/2		group	-0.853	0.000999
A2M		transporter	-0.655	0.001
CHAD		other	-0.632	0.001
STYX		phosphatase	0.632	0.001
MARK4		kinase	0	0.00102
SHH		peptidase	1.279	0.00102
TRIP6		cytokine	-0.277	0.00102
TRIM21		enzyme	-0.5	0.00103
Gata		group	-1.155	0.00103
S100P		other	-0.277	0.00104
DAPP1		other	0.302	0.00104
ONECUT1		transcription regulator	-1.897	0.00104
CDK1		kinase	-1.219	0.00105
PAQR3		other	-0.277	0.00105
TNFSF8		cytokine	-0.707	0.00106
F5		enzyme	-0.707	0.00106
SPRED2		cytokine	0.632	0.00106
TGFB3		growth factor	-1.789	0.00107
ADK		kinase	0.277	0.00107
Gm-csf		group	-0.471	0.00107
MERTK		kinase	0.775	0.00108
IL18RAP		transmembrane receptor	0.775	0.00108
PDPK1		kinase	-0.577	0.00108
KIDINS220		transcription regulator	-0.632	0.00108
ITGA5		transmembrane receptor	-0.655	0.00109
RXRA		ligand-dependent nuclear receptor	0.655	0.00109
EIF2S1		translation regulator	-0.277	0.00109
PPP1R3A		phosphatase	-0.333	0.00109
LANCL2		other	-0.302	0.0011
JAM3		other	0.302	0.0011
Hdac		group	-1.633	0.00111
HNRNPK		transcription regulator	-1.732	0.00111
LAMA1		other	0	0.00111
Gef		group	0.333	0.00112
TEAD		group	-0.333	0.00112
JAM2		other	0.302	0.00112
BTRC		enzyme	0.756	0.00112
GRB7		other	-0.775	0.00114
YAP1		transcription regulator	0.258	0.00114
Collagen type II		complex	0	0.00114
SERPINH1		other	-0.577	0.00115
ITCH		enzyme	-1.225	0.00115
GABBR1		G-protein coupled receptor	-0.577	0.00117
ESR1		ligand-dependent nuclear receptor	-0.943	0.00117
GRM5		G-protein coupled receptor	-0.471	0.00117
DTX1		transcription regulator	-0.577	0.00119
HAVCR1		other	1.633	0.00119
ARID1A		transcription regulator	1.897	0.00119
SMURF1		enzyme	-0.535	0.0012
DDIT4	2.953	other	-0.853	0.00121
IGFBP5		other	-0.277	0.00122
DUSP5		phosphatase	0.707	0.00123
NSF		transporter	0.426	0.00124
AGA		enzyme	-1.095	0.00125
STAB2		transmembrane receptor	-0.832	0.00126
CCL19		cytokine	-0.775	0.00128
CAMK2B		kinase	-1.155	0.00128
RPTOR		other	1.069	0.00129
HTR2B		G-protein coupled receptor	0	0.00129
RhoGap		group	0	0.00129
C4A/C4B		peptidase	0.707	0.00129
CNR1		G-protein coupled receptor	1.213	0.0013
RHEB		enzyme	0	0.00131
PTPN22		phosphatase	-1.604	0.00132
PLCD1		enzyme	0.333	0.00132
Sfk		group	-2.558	0.00133
FTO		other	0.775	0.00133
ENG		transmembrane receptor	1.387	0.00133
STK4		kinase	0.943	0.00134
DLK1		other	0	0.00134
ERK		group	-0.378	0.00135
STK40		kinase	-0.832	0.00135
SYK/ZAP		group	0	0.00136
HSPE1		enzyme	-0.258	0.00136
DGKD		kinase	-0.577	0.00139
Calcineurin B		group	-0.277	0.00139
IL16		cytokine	-0.832	0.00139
Gm21596/Hmgb1		transcription regulator	1	0.00141
PIK3R6		kinase	0	0.00142
NFATC1		transcription regulator	-0.302	0.00142
SMPD2		enzyme	-0.832	0.00143
SMARCD3		transcription regulator	-0.302	0.00144
DESI2		other	-0.707	0.00145
PP1 protein complex group		complex	-1.213	0.00145
AHSA1		other	0.302	0.00147
IRF3-IRF7		complex	0.728	0.00149
MED24		transcription regulator	-0.905	0.00149
GIPC1		other	-0.577	0.0015
GRB10		other	1.732	0.0015
CSF1		cytokine	1.633	0.00151
Ferritin		complex	-0.832	0.00152
Pmaip1		other	-0.471	0.00152
FAF1		other	0	0.00155
PTPRO		phosphatase	-1.213	0.00155
PLA2		group	-0.905	0.00157
PPP2R2D		phosphatase	-0.302	0.00157
TGFBR3		kinase	0.577	0.00157
HCAR2		G-protein coupled receptor	-0.535	0.00157
CXCR5		G-protein coupled receptor	0.302	0.00159
PTPRG		phosphatase	-0.5	0.0016
PAWR		transcription regulator	-0.243	0.00166
SMAD3-SMAD4-TOB		complex	-0.707	0.00167
Syntaxin		group	0	0.00167
CYLD	-1.181	transcription regulator	-1.606	0.00167
DNA-methyltransferase		group	0	0.0017
RLN1		other	-1.414	0.0017
SULF1		enzyme	1.414	0.0017
CBL		transcription regulator	-0.577	0.0017
RPS6KB2		kinase	0	0.0017
GNA12		enzyme	-0.816	0.00173
SELL		transmembrane receptor	-1.265	0.00179
SFN		other	-1.897	0.00179
CD80		transmembrane receptor	-0.577	0.00187
SNCB		other	-0.655	0.00188
ADRA2B		G-protein coupled receptor	0.577	0.0019
Apaf1-Cycs		complex	-0.277	0.00195
MPZL1		other	0	0.00195
TMPRSS4		peptidase	0.707	0.00195
GEM		enzyme	0.832	0.00197
CD69		transmembrane receptor	-0.333	0.00198
TARBP2		other	1.265	0.00199
RALGDS		other	1	0.00202
Ifnar		group	1.732	0.00202
C3AR1		G-protein coupled receptor	-1.732	0.00205
NPR1		enzyme	0.832	0.00205
WNK4		kinase	-1	0.00205
LRRC8A		ion channel	1.414	0.00208
SEMA3F		other	0.707	0.00208
FGF10		growth factor	0.632	0.00209
PRLHR		G-protein coupled receptor	1	0.00209
TRAT1	-1.223	kinase	0.302	0.00213
ADORA3		G-protein coupled receptor	-0.707	0.00213
DMAP1		transcription regulator	-1.387	0.00214
ASXL2		other	-1.265	0.00216
IL27		cytokine	0.447	0.00217
PIAS2		transcription regulator	0	0.00217
MAP4K4		kinase	0.905	0.00219
SIRT6		enzyme	-0.192	0.0022
MEF2C		transcription regulator	-1.155	0.0022
NTN4		other	-0.302	0.00223
KIR-L		group	0.632	0.00224
POU2AF1		transcription regulator	0.707	0.00227
VWC2		other	0.378	0.00228
GFI1		transcription regulator	-0.775	0.00233
DISC1		other	-1	0.00235
PIBF1		other	0.632	0.00236
MSX2		transcription regulator	0.277	0.00241
HK1		kinase	0	0.00242
Ncx		group	-0.333	0.00243
NDRG1		kinase	-0.905	0.00244
NR3C1		ligand-dependent nuclear receptor	1.89	0.00252
AVPR1A		G-protein coupled receptor	-0.333	0.00253
MC3R		G-protein coupled receptor	0	0.00257
PDIA2		enzyme	0.707	0.00257
ICAM2		other	0	0.0026
ANGPTL3		growth factor	0.707	0.00263
PHF1		transcription regulator	0	0.00264
TNK2		kinase	0.302	0.00271
CD28	-1.377	transmembrane receptor	-1.414	0.00274
B4GALT6		enzyme	0	0.00274
MAP3K8		kinase	1.342	0.00281
SIGLEC9		other	-0.707	0.00285
P2rx7		ion channel	-0.333	0.00287
Growth hormone		group	0.447	0.00291
EIF2A		translation regulator	-0.632	0.00292
SHOC2		other	-1	0.00297
RRM1		enzyme	2	0.003
ITLN1		other	0	0.00303
TRAF2-TRAF5		complex	0.378	0.00304
SOX11		transcription regulator	-1	0.00314
MLST8		other	1	0.00348
LAMC1		other	-0.333	0.00354
CXCL12		cytokine	0.816	0.00364
BMP2		growth factor	0	0.00364
ERK1/2		group	-0.378	0.00364
CLK2		kinase	-1.134	0.00364
DOCK3		other	1.89	0.00364
FGF2		growth factor	1.414	0.00368
BMP15		growth factor	-0.378	0.00389
DOCK1		other	1.414	0.0039
BACH2		transcription regulator	-1.732	0.0039
SULF2		enzyme	1.414	0.00391
Ank2		other	-1.414	0.00391
NKX2-1		transcription regulator	0	0.00394
GLRX2		enzyme	-0.378	0.00398
RAF1		kinase	0.816	0.00404
CCKAR		G-protein coupled receptor	-0.378	0.00424
EZH2		transcription regulator	-1.342	0.00434
IL10		cytokine	2.828	0.00436
PRKAR1A	1.115	kinase	-0.378	0.00443
SYVN1		transporter	-0.447	0.00448
PI3K (family)		group	0	0.0045
TYR		enzyme	1.414	0.0046
CD46		other	-1.414	0.0046
TAF4B		transcription regulator	0	0.0046
ACKR3		G-protein coupled receptor	0	0.0046
Tcf7		transcription regulator	0	0.0046
TREM1		transmembrane receptor	0.816	0.0047
NACA		transcription regulator	-0.447	0.00477
SMARCE1		transcription regulator	-0.632	0.00482
EGR2		transcription regulator	0.447	0.00492
Ncoa6		transcription regulator	-1.414	0.00495
IL12RB2		transmembrane receptor	0.707	0.00495
SFRP		group	-0.378	0.00502
PTGER4	1.25	G-protein coupled receptor	0.447	0.00507
GCNT1		enzyme	0.447	0.00507
CXCR4	1.708	G-protein coupled receptor	1.732	0.00579
PDLIM2		other	-1	0.00597
COL1A1		other	1.342	0.00605
RGS1		other	1.414	0.00613
TNFSF13B		cytokine	0.577	0.00615
SCP2		transporter	-0.577	0.00615
SH2D2A		other	0.816	0.00626
IL3		cytokine	0.447	0.00677
IL12B		cytokine	1.732	0.00691
KLRC4-KLRK1/KLRK1		transmembrane receptor	-1.414	0.00697
estrogen receptor		group	0	0.007
SMAD2-SMAD4-TOB		complex	0	0.007
S100A9		other	-0.447	0.00735
FOXC1		transcription regulator	0	0.00786
Rab11		group	-1	0.00793
FOXD2		transcription regulator	1	0.00793
MYLIP		enzyme	1	0.00793
SPAST		enzyme	1	0.00793
CHMP3		other	-1	0.00793
ZG16B		other	1	0.00793
MLXIP		other	1	0.00793
MBNL2		other	-1	0.00793
SLA	1.247	other	1	0.00793
CSRP3		other	1	0.00793
PLCB4		enzyme	1	0.00793
TIMELESS		other	-1	0.00793
ANK2		other	-1	0.00793
RAB9A		enzyme	-1	0.00793
CD164		other	1	0.00793
RC3H1		enzyme	1	0.00793
SV2C		other	-0.447	0.00817
LRP5		transmembrane receptor	0	0.00879
S100A8		other	-0.447	0.00883
ZAP70		kinase	1.732	0.00903
GATA3		transcription regulator	0.447	0.00977
CBX7		other	-1.414	0.00978
CENPA		other	1.414	0.00978
Lh		complex	1	0.00981
HMGB2		transcription regulator	1.342	0.0103
IRF8		transcription regulator	0	0.0105
MAFK		transcription regulator	0	0.0105
SPDEF		transcription regulator	0.577	0.0105
SOCS6		other	1.414	0.0108
NFAT5		transcription regulator	1.414	0.0119
IL15RA		transmembrane receptor	0	0.0119
TNFRSF8		transmembrane receptor	0.577	0.012
CD40		transmembrane receptor	-2.236	0.0124
BMP		group	0	0.013
RNF31		enzyme	1.414	0.013
ANXA1	1.235	enzyme	1.414	0.013
LCN2		transporter	-0.577	0.0132
NEUROG1		transcription regulator	-1.732	0.0137
USP7		peptidase	0	0.0142
NOD2		other	0.577	0.0143
IKZF1		transcription regulator	1	0.015
SLC4A5		transporter	1	0.0158
MBNL3		other	-1	0.0158
SMPD3		enzyme	-1	0.0158
CERS3		transcription regulator	1	0.0158
SP6		transcription regulator	1	0.0158
HSD17B14		enzyme	1	0.0158
ZNF366		transcription regulator	-1	0.0158
STAT3/5		group	-1	0.0158
PACS1		other	1	0.0158
CSNK1E		kinase	1	0.0158
HSPE1		enzyme	-1	0.0158
ATP1A1		transporter	1	0.0158
RILP		other	-1	0.0158
PHLDA1		other	-1	0.0158
STAMBP		enzyme	-1	0.0158
CNPY2		other	-1	0.0158
Bhlhe41		transcription regulator	-1	0.0158
WTAP		other	-1	0.0158
Fgf		group	0	0.0166
Raf		group	1.414	0.0166
SCARB1		transporter	0	0.0179
WNT4		cytokine	1.414	0.0179
UHRF2		enzyme	-1.414	0.0206
PAX5		transcription regulator	-1.414	0.022
WHSC1L1		enzyme	-1	0.0236
MAGEA11		other	-1	0.0236
PRMT7		enzyme	1	0.0236
CERS4		transcription regulator	1	0.0236
SFRP5		transmembrane receptor	-1	0.0236
Ap1 gamma		group	1	0.0236
EMP2		other	-1	0.0236
LY9	-1.21	other	-1	0.0236
Ank2		other	-1	0.0236
AKAP13		other	1	0.0236
ITGAD		other	-1	0.0236
CD226		other	-1	0.0236
CYCS		transporter	1	0.0236
SLAMF7		other	1	0.0313
IgD		complex	-1	0.0313
HDAC10		transcription regulator	-1	0.0313
SLA2		other	1	0.0313
SNIP1		other	-1	0.0313
OPRD1		G-protein coupled receptor	-1	0.0313
H2AFX		transcription regulator	-1	0.0313
IGL		other	-1	0.0313
SET		phosphatase	0	0.033
TOX		other	-1	0.039
Ifna4		other	1	0.039
AMER1		other	1	0.0466
FXR2		other	1	0.0466
Ncoa6		transcription regulator	-1	0.0466
EDA		cytokine	1	0.0466
CBLB		enzyme	-1	0.0617
IL18BP		other	1	0.0617
